# Supplementary material for: The Time-Dependent Dynamics of Gut Microbiota and the Interaction With Host Metabolism in Mouse Pulmonary Fibrosis Models
Source: Research Square preprint supplement (doi:10.21203/rs.3.rs-882650/v1), 2021-09-30
Supplement: Supplementary file 4 [file d0df4e077a7631401cb9b4f8.xlsx]

## Sheet: Sheet1
Table S2 Representative differential metabolites among Model_7Day, Model_14Day, Model_28Day, and Control
Compounds	Class	Q1 (Da)	Molecular Weight (Da)	Ionization model	Formula	Control vs Model_7Day			Control vs Model_14Day			Control vs Model_28Day
						VIP	P-value	FC	VIP	P-value	FC	VIP	P-value	FC
Allantoin	Organic acid And Its derivatives	157.036	158.044	[M-H]-	C4H6N4O3	1.13331	0.00338775	0.774589	1.40551	6.05271e-05	0.659214	1.98266	0.0089159	0.809007
13-HOTrE	Oxidized lipids	293.212	294.1	[M-H]-	C18H30O3	1.14128	0.002532	0.581602	1.52853	1.20588e-05	0.209192	2.36896	0.00539791	0.591837
Hexadecanoic Acid(C16:0)	FA	255.232	256.24	[M-H]-	C16H32O2	1.60912	1.23543e-08	1.92419	1.56338	1.33516e-08	1.89328	3.27969	1.99376e-09	2.04613
Linoleic Acid(C18:2N6C)	FA	279.232	280.24	[M-H]-	C18H32O2	1.4936	4.92392e-07	1.39818	1.19485	0.000724927	1.25533	3.12576	6.60383e-08	1.47576
Dodecanoic Acid(C12:0)	FA	199.17	200.17	[M-H]-	C12H24O2	1.32914	0.000214219	0.553907	1.25822	0.000330131	0.564401	2.16072	0.00584429	0.699855
Elaidic Acid(C18:1N9T)	FA	281.248	282.25	[M-H]-	C18H34O2	1.5665	3.33335e-08	1.73173	1.5178	4.23337e-07	1.7825	3.25109	2.7702e-09	2.01909
DHA	Oxidized lipids	327.232	328.24	[M-H]-	C22H32O2	1.61736	6.52152e-09	1.84494	1.33591	0.000383187	1.52126	3.19709	1.11188e-06	1.84569
Xanthosine	Nucleotide And Its metabolomics	283.068	284.076	[M-H]-	C10H12N4O6	1.14311	0.0108072	1.48253	1.68205	2.01074e-07	0.156193	2.52948	0.00143053	0.707607
Carbamoyl phosphate	Organic acid And Its derivatives	139.975	140.983	[M-H]-	CH4NO5P	1.25972	0.00170192	0.668963	1.50863	2.71602e-05	0.465776	2.17131	0.00877628	0.732401
13(R)-HODE	Oxidized lipids	295.2	296.235	[M-H]-	C18H32O3	1.27927	0.00125523	0.542252	1.58107	1.85946e-05	0.215248	1.99314	0.0308874	0.68714
9,12-octadecadienoic acid	FA	275.201	276.209	[M-H]-	C18H28O2	1.46808	4.99662e-05	0.411416	1.46648	3.95583e-06	0.253804	2.02188	0.0138154	0.67127
4,7,10,13,16,19-hexanoic acid	Oxidized lipids	327.232	328.24	[M-H]-	C22H32O2	1.61736	6.52152e-09	1.84494	1.33591	0.000383187	1.52126	3.19709	1.11188e-06	1.84569
DL-2-hydroxystearic acid	FA	299.259	300.266	[M-H]-	C18H36O3	1.37401	0.000405292	1.84844	1.27492	0.00160791	1.74619	2.95751	8.08416e-05	1.85965
2-hydroxyhexadecanoic acid	FA	271.227	272.235	[M-H]-	C16H32O3	1.50413	7.71029e-06	1.77223	1.05465	0.00440606	1.48482	3.03207	3.77564e-06	1.81595
8,11-icosadienoic acid	FA	303.2	304.24	[M-H]-	C20H32O2	1.62664	4.31988e-09	2.02879	1.38674	2.71065e-05	1.4857	3.12285	2.22565e-07	1.74214
cis-1-Pentadecenoic Acid(C15: 1)	FA	239.201	240.209	[M-H]-	C15H28O2	1.27429	0.000248963	1.75916	1.19865	0.000383095	1.66732	2.28444	0.00319194	1.50532
Adenosine	Nucleotide And Its metabolomics	268.097	267.097	[M+H]+	C10H13N5O4	0.82144	0.0381535	1.26326	1.70323	5.922e-05	72.3115	1.42816	0.206557	2.19687
L-Thyroxine	Hormones and hormone related compunds	777.687	776.687	[M+H]+	C15H11I4NO4	1.2219	0.000673863	1.49849	1.38092	2.4595e-05	1.52825	1.93753	0.0143495	1.1892
N-Methyltryptamine	Tryptamines,Cholines,Pigments	175	174.116	[M+H]+	C11H14N2	1.30888	2.30612e-05	4.76273	1.33271	0.00422644	8.44891	1.83843	0.0158278	3.03168
Methyl Indole-3-Acetate	Heterocyclic compounds	190.1	189.079	[M+H]+	C11H11NO2	1.07671	0.00386069	1.80356	1.33082	9.58898e-05	2.07581	2.07556	0.0079832	1.83882
Punicic Acid	FA	279.3	278.225	[M+H]+	C18H30O2	1.23977	0.00100402	0.488275	1.50782	3.56371e-05	0.232912	2.23686	0.0100763	0.605505
LPI(18:2/0:0)	GP	595.288	596.296	[M-H]-	C27H49O12P	1.00132	0.00801185	1.36823	1.32194	0.000282168	0.50728	1.73776	0.0294843	0.717998
PE(22:6_16:0)	GP	762.507	763.515	[M-H]-	C43H74NO8P	1.65582	6.78402e-06	0.390628	1.05069	0.00729909	0.696298	2.22433	0.00498392	1.28677
PG(18:0_18:2)	GP	773.541	774.541	[M-H]-	C42H79O10P	1.40659	0.000157664	0.476157	1.08663	0.00246096	0.577561	2.15766	0.00522286	1.39709
PS(18:0_18:0)	GP	790.56	791.568	[M-H]-	C42H82NO10P	1.6278	5.54735e-05	0.330245	1.21295	0.00117777	0.536227	2.023	0.00724741	1.39659
Carnitine C12:1	FA	342.265	341.257	[M+H]+	C19H35NO4	1.25581	0.000421079	0.585167	1.04958	0.00162547	0.580694	1.52222	0.03576	0.77195
Carnitine C14:2	FA	368.281	367.272	[M+H]+	C21H37NO4	1.37274	0.000316831	0.643496	1.02506	0.00555554	0.632553	1.92205	0.0104269	0.776877
DG(15:0_18:0)	GL	600.554	582.522	[M+NH4]+	C36H70O5	1.13029	0.005079	0.765623	1.00298	0.00737201	0.756137	1.82716	0.0175149	0.811817
MG(17:0)	GL	362.321	344.293	[M+NH4]+	C20H40O4	1.42434	0.000102603	0.809381	1.23972	0.000186033	0.803358	1.90736	0.0196917	0.905518
MG(18:0)	GL	376.352	358.308	[M+NH4]+	C21H42O4	1.29018	0.000176756	0.85164	1.15627	0.00216949	0.901012	2.01492	0.0108319	0.914355
LPC(0:0/15:0)	GP	482.322	481.317	[M+H]+	C23H48NO7P	1.02416	0.00735988	0.819462	1.42486	3.48472e-06	0.632817	1.96056	0.011454	0.871551
LPC(16:1/0:0)	GP	494.325	493.317	[M+H]+	C24H48NO7P	1.26713	0.00114229	0.723855	1.49287	9.32914e-06	0.554019	1.91201	0.0142944	0.796899
PC(16:0_22:6)	GP	806.57	805.562	[M+H]+	C46H80NO8P	1.07711	0.00547425	0.82636	1.16197	0.0011833	0.810073	1.91737	0.0124833	1.11168
PE(18:0_22:4)	GP	796.586	795.578	[M+H]+	C45H82NO8P	1.34989	0.00028047	0.627364	1.0849	0.00252146	0.713576	1.7477	0.0265158	1.20691
PE(20:5_18:1)	GP	764.523	763.515	[M+H]+	C43H74NO8P	1.64772	1.84104e-05	0.29686	1.06918	0.00602066	0.643789	1.88796	0.0204217	1.28211
PE(17:0_22:6)	GP	778.539	777.531	[M+H]+	C44H76NO8P	1.64474	8.07292e-06	0.357096	1.09968	0.00153999	0.626356	1.95191	0.0192147	1.22819
PE(22:6_18:0)	GP	792.554	791.547	[M+H]+	C45H78NO8P	1.64671	4.95926e-05	0.303699	1.22925	0.000840606	0.506093	1.94942	0.0217049	1.29965
PE(19:0_22:6)	GP	806.57	805.562	[M+H]+	C46H80NO8P	1.70396	4.72403e-07	0.356315	1.31601	1.9088e-05	0.523869	1.68486	0.0378806	1.18721
PG(18:0_18:1)	GP	794.591	776.557	[M+NH4]+	C42H81O10P	1.4805	2.18018e-06	0.311047	1.35475	6.40926e-05	0.486677	1.6536	0.034867	1.23959
PG(18:1_18:1)	GP	792.575	774.541	[M+NH4]+	C42H79O10P	1.50549	0.000375346	0.449413	1.22375	0.00171778	0.53447	1.99518	0.023598	1.3085
TG(16:0_20:4_22:6)	GL	944.771	926.736	[M+NH4]+	C61H98O6	1.58817	0.000106577	0.320166	1.48485	3.55425e-05	0.259989	1.75661	0.0356039	1.284
O-Phosphorylethanolamine	GP	140.011	141.019	[M-H]-	C2H8NO4P	1.30456	0.000867011	0.640807	1.42394	4.20634e-05	0.49405	2.19249	0.00828844	0.739464
Sphingosine	SL	300.289	299.282	[M+H]+	C18H37NO2	1.13228	0.00304201	1.4569	0.975567	0.00978201	1.29153	0.285214	0.785448	1.02495
SPH(d18:1)	SL	300.29	299.282	[M+H]+	C18H37NO2	0.296707	0.471645	1.08187	1.40243	7.13375e-06	0.461234	2.33948	0.00228075	0.677383
S1P(d18:1)	SL	380.257	379.249	[M+H]+	C18H38NO5P	1.21285	0.00184694	1.96946	0.535352	0.227661	1.45468	1.09244	0.243207	1.32645
Cer(d18:1/24:1)	SL	648.629	647.622	[M+H]+	C42H81NO3	1.02348	0.00582116	0.789226	1.34811	7.0502e-05	0.692643	0.823793	0.232781	1.10444
HexCer(d18:1/18:0)	SL	728.604	727.596	[M+H]+	C42H81NO8	1.08094	0.00485186	0.704688	1.03927	0.00503287	0.67731	1.09963	0.185804	1.12872
SHexCer (d18:1:/24:0)	SL	892.8	891.647	[M+H]+	C48H93NO11S	1.16418	0.00145463	0.566619	1.3361	0.000133028	0.441822	0.81131	0.316556	1.13711
SM(d18:1/12:0)	SL	647.513	646.505	[M+H]+	C35H71N2O6P	1.32466	0.000106944	0.658708	1.38505	2.78069e-05	0.619553	0.231327	0.701601	1.03111
