# Supplementary material for: The Time-Dependent Dynamics of Gut Microbiota and the Interaction With Host Metabolism in Mouse Pulmonary Fibrosis Models
Source: Research Square preprint supplement (doi:10.21203/rs.3.rs-882650/v1), 2021-09-30
Supplement: Supplementary file 5 [file 31ba3e654a74bcb6dca976d3.xlsx]

## Sheet: Sheet1
Table S3 LEfSe (LDA effect size) analysis of all samples identified 79 taxa
Taxa	Abundace	Group	LDA_score	P-value
Bacteria.Verrucomicrobia.Verrucomicrobiae.Verrucomicrobiales.Akkermansiaceae	5.04762	Control	4.67886	0.031909
Bacteria.Firmicutes.Clostridia.Clostridiales.Ruminococcaceae.Faecalibacterium.Faecalibacterium_prausnitzii	0.937553	Control	2.44731	0.0299004
Bacteria.Verrucomicrobia	5.04762	Control	4.67886	0.031909
Bacteria.Firmicutes.Clostridia.Clostridiales.Ruminococcaceae.Faecalibacterium	0.956689	Control	2.51174	0.0254684
Bacteria.Firmicutes.Clostridia.Clostridiales.Lachnospiraceae.Roseburia.Roseburia_inulinivorans	1.41231	Control	2.22163	0.00335399
Bacteria.Verrucomicrobia.Verrucomicrobiae	5.04762	Control	4.67886	0.031909
Bacteria.Verrucomicrobia.Verrucomicrobiae.Verrucomicrobiales.Akkermansiaceae.Akkermansia	5.04762	Control	4.67886	0.031909
Bacteria.Verrucomicrobia.Verrucomicrobiae.Verrucomicrobiales.Akkermansiaceae.Akkermansia.Akkermansia_muciniphila	5.04762	Control	4.67886	0.031909
Bacteria.Verrucomicrobia.Verrucomicrobiae.Verrucomicrobiales	5.04762	Control	4.67886	0.031909
Bacteria.Firmicutes.Clostridia.Clostridiales.Eubacteriaceae	3.79507	Model_7Day	3.32626	0.0258997
Bacteria.Firmicutes.Clostridia.Clostridiales.Catabacteriaceae.Catabacter	0	Model_7Day	3.42369	0.0236589
Bacteria.Bacteroidetes.Bacteroidia.Bacteroidales.Prevotellaceae.Prevotella.Prevotella_sp_MGM1	4.56775	Model_7Day	4.14987	0.0129711
Bacteria.Firmicutes.Clostridia.Clostridiales.Catabacteriaceae	0	Model_7Day	3.23705	0.0236589
Eukaryota.Apicomplexa.Conoidasida.Eucoccidiorida	1.01807	Model_7Day	2.86182	0.0236589
Bacteria.Firmicutes.Clostridia.Clostridiales.Ruminococcaceae.Negativibacillus	1.32408	Model_7Day	2.36734	0.00246823
Bacteria.Proteobacteria.Betaproteobacteria.Burkholderiales.Burkholderiaceae.Pandoraea	0	Model_7Day	3.47001	0.0236589
Eukaryota.Apicomplexa.Conoidasida.Eucoccidiorida.Cryptosporidiidae.Cryptosporidium.Cryptosporidium_muris	1.01807	Model_7Day	2.71809	0.0236589
Bacteria.Actinobacteria.Coriobacteriia.Eggerthellales.Eggerthellaceae.Gordonibacter.Gordonibacter_sp_An232A	2.34841	Model_7Day	2.04434	0.0245881
Eukaryota.Ascomycota	0.337859	Model_7Day	2.60715	0.0047349
Bacteria.Firmicutes.Bacilli.Bacillales.Staphylococcaceae.Staphylococcus.Staphylococcus_lentus	1.25815	Model_7Day	2.58495	0.00352224
Bacteria.Proteobacteria	3.93174	Model_7Day	3.4775	0.0260381
Eukaryota.Ascomycota.Sordariomycetes.Hypocreales.Nectriaceae.Fusarium.Fusarium_verticillioides	0.337859	Model_7Day	2.59559	0.0047349
Bacteria.Firmicutes.Clostridia.Clostridiales.Lachnospiraceae.Blautia	3.60948	Model_7Day	3.00968	0.0288084
Eukaryota.Ascomycota.Sordariomycetes.Hypocreales	0.337859	Model_7Day	2.56777	0.0047349
Eukaryota.Apicomplexa.Conoidasida.Eucoccidiorida.Cryptosporidiidae	1.01807	Model_7Day	2.89208	0.0236589
Bacteria.Firmicutes.Clostridia.Clostridiales.Eubacteriaceae.Eubacterium	3.79456	Model_7Day	3.32624	0.0258997
Eukaryota	1.10999	Model_7Day	2.46532	0.00175767
Bacteria.Firmicutes.Bacilli.Bacillales.Staphylococcaceae.Jeotgalicoccus.Jeotgalicoccus_halotolerans	0.311771	Model_7Day	3.08337	0.0236589
Bacteria.Proteobacteria.Betaproteobacteria.Burkholderiales.Burkholderiaceae.Pandoraea.Pandoraea_sputorum	0	Model_7Day	3.54857	0.0236589
Eukaryota.Ascomycota.Sordariomycetes.Hypocreales.Nectriaceae.Fusarium	0.337859	Model_7Day	2.59158	0.0047349
Bacteria.Firmicutes.Clostridia.Clostridiales.Ruminococcaceae.Negativibacillus.Negativibacillus_massiliensis	1.32408	Model_7Day	2.36734	0.00246823
Bacteria.Firmicutes.Bacilli.Bacillales.Staphylococcaceae.Jeotgalicoccus	0.311771	Model_7Day	3.0783	0.0236589
Eukaryota.Apicomplexa.Conoidasida	1.01807	Model_7Day	2.65728	0.0236589
Bacteria.Firmicutes.Clostridia.Clostridiales.Eubacteriaceae.Eubacterium.Eubacterium_sp_14_2	3.60599	Model_7Day	3.2532	0.0113802
Eukaryota.Ascomycota.Sordariomycetes	0.337859	Model_7Day	2.57865	0.0047349
Eukaryota.Apicomplexa.Conoidasida.Eucoccidiorida.Cryptosporidiidae.Cryptosporidium	1.01807	Model_7Day	2.66272	0.0236589
Eukaryota.Apicomplexa	1.01807	Model_7Day	2.79061	0.0236589
Bacteria.Bacteroidetes.Bacteroidia.Bacteroidales.Bacteroidaceae.Bacteroides.Bacteroides_sp_AM44_19	2.94119	Model_7Day	2.44806	0.0404857
Bacteria.Firmicutes.Clostridia.Clostridiales.Lachnospiraceae.Blautia.Blautia_coccoides	3.33139	Model_7Day	2.9234	0.000258635
Bacteria.Firmicutes.Clostridia.Clostridiales.Catabacteriaceae.Catabacter.Catabacter_hongkongensis	0	Model_7Day	3.22266	0.0236589
Eukaryota.Ascomycota.Sordariomycetes.Hypocreales.Nectriaceae	0.337859	Model_7Day	2.55436	0.0047349
Bacteria.Candidatus_Saccharibacteria	1.01399	Model_7Day	2.8604	0.000910388
Bacteria.Firmicutes.Bacilli.Lactobacillales.Lactobacillaceae.Lactobacillus.Lactobacillus_reuteri	3.2364	Model_14Day	2.94724	0.00259543
Bacteria.Firmicutes.Clostridia.Clostridiales.Lachnospiraceae.Anaerostipes	1.11092	Model_14Day	2.495	0.00682083
Bacteria.Firmicutes.Bacilli.Lactobacillales.Lactobacillaceae.Lactobacillus	4.77479	Model_14Day	4.41997	0.0325931
Bacteria.Firmicutes.Clostridia.Clostridiales.Peptostreptococcaceae	3.3519	Model_14Day	2.68178	0.00582351
Bacteria.Firmicutes.Clostridia.Clostridiales.Lachnospiraceae.Lachnoclostridium._Clostridium__lavalense	2.88098	Model_14Day	2.47621	0.015493
Bacteria.Proteobacteria.Betaproteobacteria.Burkholderiales.Burkholderiaceae.Cupriavidus.Cupriavidus_pauculus	1.23056	Model_14Day	2.58078	0.000135531
Bacteria.Bacteroidetes.Bacteroidia.Bacteroidales.Bacteroidaceae.Bacteroides.Bacteroides_sp_3_1_40A	2.35294	Model_14Day	2.3151	0.0236589
Bacteria.Firmicutes.Bacilli.Lactobacillales.Lactobacillaceae	4.77479	Model_14Day	4.41997	0.0325931
Bacteria.Firmicutes.Clostridia.Clostridiales.Lachnospiraceae.Anaerostipes.Anaerostipes_sp_AF04_45	1.09239	Model_14Day	2.66529	0.00101039
Bacteria.Actinobacteria.Actinobacteria.Bifidobacteriales.Bifidobacteriaceae.Bifidobacterium.Bifidobacterium_pseudolongum	4.65378	Model_28Day	4.28144	0.00572132
Bacteria.Actinobacteria.Coriobacteriia.Coriobacteriales.Atopobiaceae.Olsenella	0.794381	Model_28Day	2.66179	0.0302235
Bacteria.Bacteroidetes.Bacteroidia.Bacteroidales.Bacteroidaceae.Bacteroides.Bacteroides_fragilis	3.11744	Model_28Day	2.46346	0.0133075
Bacteria.Proteobacteria.Gammaproteobacteria.Enterobacterales.Enterobacteriaceae.Cronobacter.Cronobacter_dublinensis	1.17671	Model_28Day	2.91068	0.00490283
Bacteria.Actinobacteria.Actinobacteria.Bifidobacteriales.Bifidobacteriaceae.Bifidobacterium.Bifidobacterium_gallinarum	0.76565	Model_28Day	3.04916	0.00338845
Bacteria.Actinobacteria.Actinobacteria.Bifidobacteriales.Bifidobacteriaceae	4.65461	Model_28Day	4.28231	0.00572132
Bacteria.Bacteroidetes.Bacteroidia.Bacteroidales.Odoribacteraceae.Butyricimonas.Butyricimonas_synergistica	2.6651	Model_28Day	2.1048	0.0368141
Bacteria.Proteobacteria.Gammaproteobacteria.Vibrionales.Vibrionaceae.Vibrio	0	Model_28Day	3.52365	0.0047349
Bacteria.Actinobacteria.Actinobacteria.Micrococcales.Micrococcaceae.Arthrobacter.Arthrobacter_psychrolactophilus	0.292829	Model_28Day	3.27803	0.00187068
Bacteria.Firmicutes.Bacilli.Lactobacillales.Enterococcaceae.Enterococcus.Enterococcus_plantarum	0.885654	Model_28Day	2.77627	0.00187068
Bacteria.Actinobacteria.Actinobacteria.Bifidobacteriales.Bifidobacteriaceae.Bifidobacterium	4.65461	Model_28Day	4.28231	0.00572132
Bacteria.Proteobacteria.Gammaproteobacteria.Vibrionales	0	Model_28Day	3.6708	0.0047349
Bacteria.Bacteroidetes.Bacteroidia.Bacteroidales.Bacteroidaceae.Bacteroides.Bacteroides_stercoris	1.29938	Model_28Day	2.6177	0.00392562
Bacteria.Bacteroidetes.Bacteroidia.Bacteroidales.Muribaculaceae.Duncaniella	3.57597	Model_28Day	2.76604	0.0221722
Bacteria.Proteobacteria.Gammaproteobacteria.Vibrionales.Vibrionaceae	0	Model_28Day	3.22978	0.0047349
Bacteria.Bacteroidetes.Bacteroidia.Bacteroidales.Tannerellaceae.Parabacteroides.Parabacteroides_distasonis	4.40392	Model_28Day	3.7058	0.0260381
Bacteria.Proteobacteria.Gammaproteobacteria.Vibrionales.Vibrionaceae.Vibrio.Vibrio_parahaemolyticus	0	Model_28Day	3.47606	0.0047349
Bacteria.Bacteroidetes.Bacteroidia.Bacteroidales.Rikenellaceae.Alistipes.Alistipes_sp_Marseille_P2431	2.19303	Model_28Day	2.03526	0.000753086
Bacteria.Firmicutes.Clostridia.Clostridiales.Ruminococcaceae.Bittarella.Bittarella_massiliensis	1.00426	Model_28Day	2.78144	0.0176365
Bacteria.Actinobacteria.Actinobacteria.Bifidobacteriales	4.65461	Model_28Day	4.28231	0.00572132
Bacteria.Actinobacteria.Actinobacteria.Bifidobacteriales.Bifidobacteriaceae.Bifidobacterium.Bifidobacterium_choerinum	1.07342	Model_28Day	2.71991	0.00855356
Bacteria.Actinobacteria.Coriobacteriia.Eggerthellales.Eggerthellaceae.Enterorhabdus.Enterorhabdus_mucosicola	3.3216	Model_28Day	2.52695	0.0307659
Bacteria.Actinobacteria.Actinobacteria	4.65503	Model_28Day	4.28245	0.00572132
Bacteria.Actinobacteria.Coriobacteriia.Coriobacteriales.Atopobiaceae	0.794381	Model_28Day	2.64521	0.0302235
Bacteria.Firmicutes.Clostridia.Clostridiales.Ruminococcaceae.Bittarella	1.00426	Model_28Day	2.78144	0.0176365
Bacteria.Actinobacteria.Coriobacteriia.Coriobacteriales.Atopobiaceae.Olsenella.Olsenella_umbonata	0.794381	Model_28Day	2.60673	0.0302235
Bacteria.Bacteroidetes.Bacteroidia.Bacteroidales.Muribaculaceae.Duncaniella.Duncaniella_muris	3.57597	Model_28Day	2.76604	0.0221722
Bacteria.Actinobacteria	4.74174	Model_28Day	4.30423	0.00703558
