# Supplementary material for: The Time-Dependent Dynamics of Gut Microbiota and the Interaction With Host Metabolism in Mouse Pulmonary Fibrosis Models
Source: Research Square preprint supplement (doi:10.21203/rs.3.rs-882650/v1), 2021-09-30
Supplement: Supplementary file 6 [file a8a69b7ecdca6709fb95c912.xlsx]

## Sheet: Table S1
Table S1 Screening for differential metabolites among Model_7Day, Model_14Day, Model_28Day, and Control
Compounds	Class	Q1 (Da)	Molecular Weight (Da)	Ionization model	Formula	Control vs Model_7Day			Control vs Model_14Day			Control vs Model_28Day
						VIP	P-value	FC	VIP	P-value	FC	VIP	P-value	FC
L-Threonine	Amino acid and Its metabolomics	118.05	119.058	[M-H]-	C4H9NO3	1.20904	0.00145296	0.728305	1.24809	0.000581737	0.672402	1.08625	0.175678	0.899575
L-Tyrosine	Amino acid and Its metabolomics	180.066	181.074	[M-H]-	C9H11NO3	0.109385	0.815439	0.972903	0.48472	0.223476	0.874377	0.578307	0.593976	0.935624
L-Arginine	Amino acid and Its metabolomics	173.104	174.112	[M-H]-	C6H14N4O2	0.151292	0.60779	0.946882	0.575802	0.233855	0.869007	0.0414137	0.775779	0.971939
L-Aspartic Acid	Amino acid and Its metabolomics	132.03	133.038	[M-H]-	C4H7NO4	1.05017	0.00810555	0.673043	1.52424	1.0897e-05	0.415012	1.45072	0.0715412	0.82183
L-Citrulline	Amino acid and Its metabolomics	174.088	175.096	[M-H]-	C6H13N3O3	0.307751	0.535779	1.08019	0.0544955	0.855476	0.978887	0.114527	0.704103	0.954903
L-Glutamic Acid	Amino acid and Its metabolomics	146.045	147.053	[M-H]-	C5H9NO4	0.256376	0.868432	1.01212	1.36296	0.000134135	0.592602	1.2752	0.124383	0.869012
L-Phenylalanine	Amino acid and Its metabolomics	164.071	165.079	[M-H]-	C9H11NO2	0.248563	0.399988	0.976185	0.71069	0.0692977	0.932018	0.554842	0.706882	1.01236
L-Pyroglutamic Acid	Amino acid and Its metabolomics	128.035	129.043	[M-H]-	C5H7NO3	0.0657457	0.626236	0.936115	0.82347	0.0327527	0.717332	0.422902	0.347609	0.885718
L-Serine	Amino acid and Its metabolomics	104.035	105.043	[M-H]-	C3H7NO3	0.835425	0.0232073	0.826648	0.848391	0.0396472	0.834721	0.213194	0.733617	0.976101
3-Hydroxy-3-Methylpentane-1,5-Dioic Acid	Amino acid and Its metabolomics	161.045	162.053	[M-H]-	C6H10O5	1.2894	0.0010264	0.312238	1.04376	0.00665848	0.414675	0.0311942	0.737762	0.94262
4-Hydroxy-L-Glutamic Acid	Amino acid and Its metabolomics	162.04	163.032	[M-H]-	C5H9NO5	0.0915603	0.71143	0.962471	0.65403	0.0924533	1.20136	0.892819	0.217848	0.888751
Allantoin	Organic acid And Its derivatives	157.036	158.044	[M-H]-	C4H6N4O3	1.13331	0.00338775	0.774589	1.40551	6.05271e-05	0.659214	1.98266	0.0089159	0.809007
Glutathione Oxidized	Amino acid and Its metabolomics	611.144	612.152	[M-H]-	C20H32N6O12S2	0.186667	0.535424	0.883282	0.233356	0.951576	1.01093	1.00428	0.13938	0.730339
Glutathione Reducedform	Amino acid and Its metabolomics	306.076	307.084	[M-H]-	C10H17N3O6S	0.762613	0.0263639	1.9287	0.737376	0.0174835	2.00087	1.21157	0.694504	1.10654
L-Asparagine Anhydrous	Amino acid and Its metabolomics	131.046	132.054	[M-H]-	C4H8N2O3	0.873151	0.0328029	0.755193	1.30278	0.00226516	0.613761	0.562559	0.359974	0.90449
L-Cysteine	Amino acid and Its metabolomics	120.012	121.02	[M-H]-	C3H7NO2S	0.346678	0.490296	0.935199	0.364039	0.497891	1.05433	0.543128	0.536979	1.06099
L-Glutamine	Amino acid and Its metabolomics	145.061	146.069	[M-H]-	C5H10N2O3	0.0317152	0.756387	0.967309	0.141572	0.692533	0.956172	0.027346	0.728949	0.965601
L-Homocitrulline	Amino acid and Its metabolomics	188.104	189.111	[M-H]-	C7H15N3O3	0.967041	0.00930856	0.744311	0.632107	0.118753	0.860521	0.7007	0.481273	1.06155
Methionine Sulfoxide	Amino acid and Its metabolomics	164.038	165.046	[M-H]-	C5H11NO3S	0.737671	0.100071	0.89367	1.04781	0.0035281	0.836365	3.09537	2.08611e-07	0.623156
N6-Acetyl-L-Lysine	Amino acid and Its metabolomics	187.108	188.116	[M-H]-	C8H16N2O3	1.51643	6.38658e-07	0.580556	1.52407	5.72125e-07	0.582814	0.727139	0.454454	1.04754
N-Acetyl-L-Leucine	Amino acid and Its metabolomics	172.097	173.105	[M-H]-	C8H15NO3	0.12508	0.5379	0.939562	0.402411	0.381033	0.893871	1.70569	0.0450455	1.24117
N-Acetyl-L-Tyrosine	Amino acid and Its metabolomics	222.077	223.085	[M-H]-	C11H13NO4	0.155454	0.953125	1.01602	0.084965	0.529782	0.869593	0.0997804	0.566135	0.876875
N-Phenylacetylglycine	Amino acid and Its metabolomics	192.066	193.074	[M-H]-	C10H11NO3	0.316234	0.262068	1.22656	1.04613	0.00613099	1.44802	0.970747	0.296566	1.16597
N-Propionylglycine	Amino acid and Its metabolomics	130.05	131.058	[M-H]-	C5H9NO3	0.513914	0.182423	0.875079	0.77046	0.0380445	0.823412	1.8336	0.0131395	1.23479
O-Phospho-L-Serine	Amino acid and Its metabolomics	184.001	185.009	[M-H]-	C3H8NO6P	0.37677	0.521559	1.04973	0.647233	0.122223	0.874975	1.01764	0.281493	1.09583
Phenylacetyl-L-Glutamine	Amino acid and Its metabolomics	263.103	264.111	[M-H]-	C13H16N2O4	0.295414	0.251859	1.27578	0.81859	0.0528572	1.56089	1.51005	0.05463	1.39465
Hododeoxycholic acid	Bile acids	391.285	392.293	[M-H]-	C24H40O4	0.251918	0.488389	1.4552	0.0216279	0.568017	1.43283	0.285629	0.484859	0.633457
4-Hydroxy-3-methoxybenzaldehyde	Benzene and substituted derivatives	151.04	152.047	[M-H]-	C8H8O3	0.264842	0.613808	1.04599	0.128152	0.755622	1.0292	0.662634	0.56672	0.950273
Xanthine	Nucleotide And Its metabolomics	151.026	152.033	[M-H]-	C5H4N4O2	0.509016	0.0156567	1.77955	0.136143	0.0511656	0.448906	0.324787	0.702553	0.888612
2'-Deoxyuridine	Nucleotide And Its metabolomics	227.067	228.075	[M-H]-	C9H12N2O5	0.249616	0.336255	0.929192	0.124011	0.724501	1.03092	0.962194	0.247979	0.907327
5-Methylcytosine	Nucleotide And Its metabolomics	124.051	125.059	[M-H]-	C5H7N3O	0.345354	0.300701	0.933848	1.41886	3.75905e-05	0.657082	1.60341	0.0560814	0.866826
Thymidine	Nucleotide And Its metabolomics	241.082	242.09	[M-H]-	C10H14N2O5	0.519635	0.264827	0.925714	1.08102	0.00244801	0.843056	0.00326387	0.793921	1.01634
Uracil	Nucleotide And Its metabolomics	111.019	112.027	[M-H]-	C4H4N2O2	0.868952	0.0921375	0.844181	0.821038	0.0319601	1.4006	0.0454749	0.888948	0.986103
Uridine	Nucleotide And Its metabolomics	243.062	244.07	[M-H]-	C9H12N2O6	0.796268	0.042805	1.21603	0.0370136	0.758899	0.972738	0.319763	0.821271	1.01933
Epinephrine	Hormones and hormone related compunds	182.082	183.09	[M-H]-	C9H13NO3	0.10056	0.675985	1.05804	0.963025	0.00812755	0.695098	2.23454	0.00337644	0.660792
Norepinephrine	Hormones and hormone related compunds	168.066	169.074	[M-H]-	C8H11NO3	0.192443	0.476266	0.940829	0.414976	0.394229	1.0576	0.173457	0.706934	0.972785
Pyrroloquinoline Quinone	Organic acid And Its derivatives	329.005	330.012	[M-H]-	C14H6N2O8	0.150558	0.954761	1.01269	0.245324	0.445221	0.848491	0.889549	0.237088	0.756646
Succinic Acid	Organic acid And Its derivatives	117.019	118.027	[M-H]-	C4H6O4	0.329042	0.710839	1.04691	0.128946	0.543407	0.926291	1.27812	0.101603	0.770227
A-Ketoglutaric Acid	Organic acid And Its derivatives	145.014	146.022	[M-H]-	C5H6O5	0.366967	0.305417	0.827847	0.548211	0.200863	0.780758	0.316595	0.455642	0.879371
Citramalic Acid	Organic acid And Its derivatives	147.029	148.1	[M-H]-	C5H8O5	1.2917	0.000311889	0.638506	1.0665	0.00421407	0.590182	0.840367	0.319567	1.09606
Tryptamine	Tryptamines,Cholines,Pigments	159.092	160.1	[M-H]-	C10H12N2	0.97297	0.0175549	1.20704	0.388134	0.373205	1.06462	1.83579	0.0297644	1.18486
D-Sorbitol	Carboxylic acids and derivatives	181.071	182.079	[M-H]-	C6H14O6	0.4252	0.595174	1.11414	0.410541	0.433666	1.18442	0.873603	0.403733	1.16669
D-Glucose	Carboxylic acids and derivatives	179.056	180.063	[M-H]-	C6H12O6	0.68288	0.0813834	1.46047	0.986864	0.00505921	1.44641	0.222182	0.936435	0.985621
D-Mannose	Carboxylic acids and derivatives	179.056	180.063	[M-H]-	C6H12O6	1.01895	0.00502356	0.745066	1.32007	0.000126075	0.641323	0.421355	0.721925	0.966603
D-Trehalose	Carboxylic acids and derivatives	341.108	342.116	[M-H]-	C12H22O11	0.695421	0.0494076	0.845704	0.76713	0.0459865	0.86799	0.957974	0.217328	0.913014
D-Erythronolactone	Aldehyde,Ketones,Esters	117.019	118.027	[M-H]-	C4H6O4	0.139259	0.767909	0.977172	0.219589	0.729733	0.971718	0.111228	0.92728	1.00493
D-Glucose 6-Phosphate	Carboxylic acids and derivatives	259.022	260.03	[M-H]-	C6H13O9P	0.00790244	0.882604	0.975531	1.06738	0.015925	0.58804	1.9283	0.0324829	0.64699
Lactose	Carboxylic acids and derivatives	341.108	342.116	[M-H]-	C12H22O11	0.695421	0.0494076	0.845704	0.76713	0.0459865	0.86799	0.957974	0.217328	0.913014
Lactulose	Carboxylic acids and derivatives	341.108	342.116	[M-H]-	C12H22O11	0.695421	0.0494076	0.845704	0.76713	0.0459865	0.86799	0.957974	0.217328	0.913014
Maltose	Carboxylic acids and derivatives	341.108	342.116	[M-H]-	C12H22O11	0.695421	0.0494076	0.845704	0.76713	0.0459865	0.86799	0.957974	0.217328	0.913014
D-Glucoronic Acid	Carboxylic acids and derivatives	193.035	194.043	[M-H]-	C6H10O7	0.535967	0.207402	0.829451	0.882939	0.0275939	0.732639	1.2081	0.20841	0.852684
Gluconic Acid	Carboxylic acids and derivatives	195.051	196.058	[M-H]-	C6H12O7	0.408136	0.270309	0.884255	0.079436	0.735628	0.966646	0.0359761	0.808309	0.975293
Orotic Acid	CoEnzyme and vitamins	155.009	156.017	[M-H]-	C5H4N2O4	0.157979	0.774076	1.04085	0.407428	0.347364	0.876856	0.796005	0.215251	0.861314
Pantothenate	CoEnzyme and vitamins	218.103	219.1	[M-H]-	C9H17NO5	0.483063	0.129882	0.774612	0.195773	0.365064	0.876863	0.0844913	0.622847	0.932119
Riboflavin	CoEnzyme and vitamins	375.13	376.138	[M-H]-	C17H20N4O6	0.154138	0.790436	0.976621	0.616152	0.150341	0.885328	0.767625	0.412158	0.922925
2-Aminoethanesulfonic Acid	Organic acid And Its derivatives	124.007	125.015	[M-H]-	C2H7NO3S	0.140667	0.501643	0.957959	1.48304	5.63543e-05	0.649455	0.893507	0.300328	0.923734
2-Hydroxybutanoic Acid	Organic acid And Its derivatives	103.04	104.047	[M-H]-	C4H8O3	1.36556	5.75379e-05	0.459998	1.146	0.00119186	0.510424	1.19216	0.150323	1.18407
2-Hydroxyisocaproic Acid	Organic acid And Its derivatives	131.071	132.079	[M-H]-	C6H12O3	1.22889	0.00138086	0.693328	0.929974	0.011748	0.72237	2.67067	0.00015114	1.54643
2-Methylsuccinic Acid	Organic acid And Its derivatives	131.034	132.042	[M-H]-	C5H8O4	0.817981	0.0284102	0.704235	1.03199	0.0285429	0.615778	1.0063	0.321405	1.14659
3-Hydroxy-3-Methyl Butyric Acid	Organic acid And Its derivatives	117.055	118.063	[M-H]-	C5H10O3	0.694154	0.0969135	0.870292	0.982666	0.00961591	0.771464	1.04896	0.205459	1.10317
3-Hydroxybutyrate	Organic acid And Its derivatives	103.04	104.047	[M-H]-	C4H8O3	0.605693	0.128674	0.845354	0.557844	0.268282	0.841959	1.60469	0.0291211	1.20971
Adipic Acid	Organic acid And Its derivatives	145.05	146.058	[M-H]-	C6H10O4	1.458	0.00168392	0.364156	1.10586	0.0106018	0.486581	0.924413	0.293433	0.81094
Azelaic Acid	Organic acid And Its derivatives	187.097	188.105	[M-H]-	C9H16O4	1.02662	0.0386634	0.573419	1.07299	0.0244363	0.537664	0.239642	0.539899	0.883841
Creatine	Organic acid And Its derivatives	130.062	131.07	[M-H]-	C4H9N3O2	0.467445	0.18395	0.909867	1.25247	0.000488507	0.703064	0.581392	0.451378	0.947233
Creatine phosphate	Nucleotide And Its metabolomics	210.1	255	[M-Na2+H]-	C4H8N3Na2O5P	0.60329	0.133394	0.930207	0.455889	0.205312	1.07729	0.588715	0.547	1.02627
Dodecanedioic Aicd	FA	229.144	230.152	[M-H]-	C12H22O4	1.02458	0.0171323	0.624632	0.577303	0.171106	0.795656	0.577794	0.569984	0.902537
Glutaric Acid	Organic acid And Its derivatives	131.034	132.042	[M-H]-	C5H8O4	0.817981	0.0284102	0.704235	1.03199	0.0285429	0.615778	1.0063	0.321405	1.14659
Guanidinoethyl Sulfonate	Organic acid And Its derivatives	166.029	167.037	[M-H]-	C3H9N3O3S	0.996801	0.025878	1.3438	0.423484	0.244284	0.856758	0.186272	0.676935	1.07122
Hippuric Acid	Organic acid And Its derivatives	178.05	179.058	[M-H]-	C9H9NO3	0.535719	0.279748	1.30491	0.166636	0.603407	1.191	0.354567	0.939646	1.01871
Hydrocinnamic Acid	Organic acid And Its derivatives	149.06	150.068	[M-H]-	C9H10O2	0.71483	0.102701	1.44183	0.0544148	0.5305	1.28136	0.924041	0.360511	1.24552
L-Lactic Acid	Organic acid And Its derivatives	89.0239	90.0317	[M-H]-	C3H6O3	0.591984	0.210432	1.11796	0.900566	0.0286376	0.772029	1.43821	0.0722807	0.843116
L-Dihydroorotic Acid	Organic acid And Its derivatives	157.025	158.033	[M-H]-	C5H6N2O4	0.163573	0.759089	0.972328	0.835234	0.0349984	0.819022	1.11039	0.220904	1.127
Malonicacid	Organic acid And Its derivatives	103.003	104.011	[M-H]-	C3H4O4	0.709119	0.0702621	0.826351	0.592366	0.227804	0.831614	1.64638	0.0235264	1.21236
Mandelic Acid	Organic acid And Its derivatives	151.04	152.047	[M-H]-	C8H8O3	0.447125	0.236996	1.23606	0.031078	0.772219	1.04743	0.899537	0.276348	1.22039
Methylmalonic Acid	Organic acid And Its derivatives	117.019	118.027	[M-H]-	C4H6O4	0.329042	0.710839	1.04691	0.128946	0.543407	0.926291	1.27812	0.101603	0.770227
Sebacate	Organic acid And Its derivatives	201.113	202.121	[M-H]-	C10H18O4	1.06428	0.0618525	0.388359	1.14083	0.0327565	0.29236	0.115263	0.490111	0.792948
Subericacid	Organic acid And Its derivatives	173.081	174.089	[M-H]-	C8H14O4	1.27488	0.00391745	0.640418	0.874103	0.0487051	0.750609	0.705855	0.41495	0.900031
TXB2 [9α,11,15S-trihydroxythromba-5Z,13E-dien-1-oic acid]	Oxidized lipids	369.228	370.236	[M-H]-	C20H34O6	0.880643	0.0268026	0.722934	1.62559	6.17114e-06	0.213218	0.661279	0.465865	0.906112
O-Phosphorylethanolamine	GP	140.011	141.019	[M-H]-	C2H8NO4P	1.30456	0.000867011	0.640807	1.42394	4.20634e-05	0.49405	2.19249	0.00828844	0.739464
Lysope 18:1	GP	478.293	479.3	[M-H]-	C23H46NO7P	1.30555	0.000497081	0.713741	1.48172	7.3675e-06	0.585765	0.559538	0.517845	1.04886
Lysope 18:0	GP	480.309	481.3	[M-H]-	C23H48NO7P	0.455622	0.239646	1.11472	0.500153	0.189711	0.879943	2.23121	0.0018175	1.34483
Lysope 16:0	GP	452.278	453.3	[M-H]-	C21H44NO7P	1.43303	0.000113276	0.692971	1.47118	1.72663e-05	0.627105	0.423906	0.569668	0.964706
Lysope 14:0	GP	424.246	425.2	[M-H]-	C19H40NO7P	0.51683	0.117058	0.773179	0.805845	0.0107512	0.635614	0.358521	0.897649	1.01661
Lysopa 16:0	GP	409.236	410.24	[M-H]-	C19H39O7P	0.163177	0.75785	0.96961	1.15637	0.00202215	0.678286	0.589548	0.566869	0.937844
9-HpODE	Oxidized lipids	311.222	312.2	[M-H]-	C18H32O4	0.710965	0.148041	1.19835	0.165831	0.735391	1.04864	1.59125	0.080194	0.736422
13-HOTrE [13S-hydroxy-9Z,11E,15Z-octadecatrienoic acid]	Oxidized lipids	293.212	294.1	[M-H]-	C18H30O3	1.14128	0.002532	0.581602	1.52853	1.20588e-05	0.209192	2.36896	0.00539791	0.591837
9,10-DiHOME [(±)9,10-dihydroxy-12Z-octadecenoic acid]	Oxidized lipids	313.238	314.246	[M-H]-	C18H34O4	0.0996208	0.667894	0.955229	0.0891676	0.979868	1.00245	2.11986	0.00875825	0.70479
γ-Linolenic Acid(C18:3N6)	FA	277.217	278.22	[M-H]-	C18H30O2	0.803366	0.0342042	0.849239	1.13807	0.00090697	0.671342	0.755957	0.312066	1.08734
Palmitoleic Acid(C16:1)	FA	253.217	254.2	[M-H]-	C16H30O2	0.606678	0.129862	1.20079	0.550171	0.0931818	1.28907	2.49155	0.000439879	1.52854
Hexadecanoic Acid(C16:0)	FA	255.232	256.24	[M-H]-	C16H32O2	1.60912	1.23543e-08	1.92419	1.56338	1.33516e-08	1.89328	3.27969	1.99376e-09	2.04613
Linoleic Acid(C18:2N6C)	FA	279.232	280.24	[M-H]-	C18H32O2	1.4936	4.92392e-07	1.39818	1.19485	0.000724927	1.25533	3.12576	6.60383e-08	1.47576
Dodecanoic Acid(C12:0)	FA	199.17	200.17	[M-H]-	C12H24O2	1.32914	0.000214219	0.553907	1.25822	0.000330131	0.564401	2.16072	0.00584429	0.699855
Elaidic Acid(C18:1N9T)	FA	281.248	282.25	[M-H]-	C18H34O2	1.5665	3.33335e-08	1.73173	1.5178	4.23337e-07	1.7825	3.25109	2.7702e-09	2.01909
DHA [4Z,7Z,10Z,13Z,16Z,19Z-docosahexaenoic acid]	Oxidized lipids	327.232	328.24	[M-H]-	C22H32O2	1.61736	6.52152e-09	1.84494	1.33591	0.000383187	1.52126	3.19709	1.11188e-06	1.84569
Cis-11,14,17-Eicosatrienoic Acid(C20:3)	FA	305.248	306.25	[M-H]-	C20H34O2	0.50352	0.309444	1.06817	0.1337	0.777115	1.01734	0.558391	0.459786	0.957413
Arachidic Acid(C20:0)	FA	311.295	312.3	[M-H]-	C20H40O2	0.439074	0.339947	1.30831	0.918739	0.0276651	1.96752	0.985492	0.28505	0.73789
Α-Linolenic Acid(C18:3N3)	FA	277.217	278.22	[M-H]-	C18H30O2	0.803366	0.0342042	0.849239	1.13807	0.00090697	0.671342	0.755957	0.312066	1.08734
3-Aminosalicylic Acid	Organic acid And Its derivatives	152.035	153.043	[M-H]-	C7H7NO3	0.567132	0.0124389	1.80167	0.0127296	0.0443276	0.451228	0.0428912	0.655801	0.875766
4-Hydroxybenzaldehyde	Benzene and substituted derivatives	121.029	122.037	[M-H]-	C7H6O2	0.741825	0.12023	1.18797	1.44458	2.58193e-06	1.94586	1.9354	0.0384368	1.23477
Neopterin	Heterocyclic compounds	252.073	253.081	[M-H]-	C9H11N5O4	0.624345	0.0952738	0.945127	0.0323732	0.906648	0.995969	0.975766	0.237508	1.06308
Biopterin	Heterocyclic compounds	236.078	237.086	[M-H]-	C9H11N5O3	0.590163	0.185139	0.897506	0.249639	0.505347	1.06084	0.357073	0.67171	0.965593
Ethylmalonate	Organic acid And Its derivatives	131.034	132.042	[M-H]-	C5H8O4	0.817981	0.0284102	0.704235	1.03199	0.0285429	0.615778	1.0063	0.321405	1.14659
2-(Formylamino)Benzoic Acid	Benzene and substituted derivatives	164.035	165.043	[M-H]-	C8H7NO3	0.613157	0.0841343	0.427458	0.837673	0.2109	0.475877	0.918399	0.424136	1.33655
N-Acetylglycine	Amino acid and Its metabolomics	116.035	117.043	[M-H]-	C4H7NO3	1.04357	0.00473043	0.711391	0.891508	0.0209582	0.65428	0.223377	0.924503	1.0078
5-Hydroxyhexanoic Acid	Organic acid And Its derivatives	131.071	132.079	[M-H]-	C6H12O3	1.3781	0.000129842	0.464631	1.05256	0.00280232	0.516379	0.883099	0.224638	0.847007
Β-Pseudouridine	Nucleotide And Its metabolomics	243.062	244.07	[M-H]-	C9H12N2O6	0.460008	0.187675	0.872324	0.538435	0.203386	0.853413	0.589282	0.553646	0.930763
Hypoxanthine-9-β-D-Arabinofuranoside	Nucleotide And Its metabolomics	267.073	268.081	[M-H]-	C10H12N4O5	0.684116	0.0169485	2.03456	0.082103	0.0789261	0.465667	0.0749285	0.994712	1.00229
Aminomalonic Acid	Organic acid And Its derivatives	118.014	119.022	[M-H]-	C3H5NO4	0.325239	0.812559	1.03034	0.112666	0.595527	0.930825	1.30464	0.118415	0.754786
Dl-Glyceraldehyde 3-Phosphate	Organic acid And Its derivatives	168.99	169.998	[M-H]-	C3H7O6P	0.0132905	0.899296	1.01991	1.08089	0.00576606	0.597299	0.477207	0.563007	0.9166
8,15-Dihete	FA	335.222	336.23	[M-H]-	C20H32O4	0.0205247	0.895199	1.01227	0.363789	0.251351	1.13579	1.31841	0.127285	1.12715
N-Acetylmethionine	Amino acid and Its metabolomics	190.054	191.062	[M-H]-	C7H13NO3S	0.447436	0.16858	0.848232	0.474718	0.230534	0.85835	0.208284	0.55173	0.934699
Ribulose-5-Phosphate	Carboxylic acids and derivatives	229.011	230.019	[M-H]-	C5H11O8P	0.237245	0.741845	1.04627	0.639584	0.0934854	1.29482	1.03894	0.295383	1.17737
Acetyl Tryptophan	Amino acid and Its metabolomics	245.093	246.1	[M-H]-	C13H14N2O3	1.40589	1.96667e-05	2.3694	0.214415	0.783737	1.05219	1.3049	0.0284535	0.526344
2-Deoxyribose 1-Phosphate	Carboxylic acids and derivatives	213.016	214.024	[M-H]-	C5H11O7P	0.585228	0.229074	1.13455	0.818357	0.0445551	1.20892	0.115231	0.751882	0.969254
N-Acetylglucosamine 1-Phosphate	Carboxylic acids and derivatives	300.048	301.056	[M-H]-	C8H16NO9P	0.162944	0.491369	0.905102	1.04485	0.0117856	0.608182	1.3466	0.0837868	0.746391
Pimelic acid	Organic acid And Its derivatives	159.066	160.074	[M-H]-	C7H12O4	1.10074	0.00698465	0.670202	0.795304	0.0815917	0.756183	1.08532	0.175553	0.828915
Xanthosine	Nucleotide And Its metabolomics	283.068	284.076	[M-H]-	C10H12N4O6	1.14311	0.0108072	1.48253	1.68205	2.01074e-07	0.156193	2.52948	0.00143053	0.707607
DL-3,4-Dihydroxyphenyl glycol	Benzene and substituted derivatives	169.05	170.058	[M-H]-	C8H10O4	1.1433	0.0283759	0.446758	1.20005	0.0148442	0.383138	0.220747	0.494947	0.845563
Indoleacrylic acid	Organic acid And Its derivatives	186.056	187.063	[M-H]-	C11H9NO2	0.158471	0.985499	0.996777	0.794129	0.0660235	0.735323	0.2627	0.887264	0.973632
2-(4-Hydroxyphenyl)ethanol	Benzene and substituted derivatives	137.06	138.068	[M-H]-	C8H10O2	0.72202	0.0706725	0.875842	1.14276	0.00224818	0.757096	0.370045	0.645323	1.03516
Hydroxyphenyllactic acid	Organic acid And Its derivatives	181.05	182.058	[M-H]-	C9H10O4	0.303695	0.858186	1.02502	0.0583182	0.81392	0.962364	2.52594	0.00156938	2.01691
2-Methylguanosine	Nucleotide And Its metabolomics	296.1	297.107	[M-H]-	C11H15N5O5	0.496605	0.148779	0.909083	0.615624	0.122964	0.886233	0.0333252	0.854684	0.987446
L-Erythrulose	Carboxylic acids and derivatives	119.034	120.042	[M-H]-	C4H8O4	0.78162	0.0516585	0.698289	0.242613	0.387379	0.868325	1.27171	0.205146	1.19304
Imidazoleacetic acid	Heterocyclic compounds	125.035	126.043	[M-H]-	C5H6N2O2	1.05507	0.00107274	0.626169	1.13678	0.000486896	0.504769	0.874232	0.376687	1.04857
Glycerol 3-phosphate	GP	171.006	172.014	[M-H]-	C3H9O6P	0.0144955	0.953535	1.00575	1.14641	0.00197891	0.636978	1.10397	0.174064	0.876683
(E)-3-(3-hydroxyphenyl)prop-2-enoic acid	Benzene and substituted derivatives	163.04	164.047	[M-H]-	C9H8O3	0.633402	0.0801259	0.460037	0.813873	0.202259	0.499211	0.997907	0.32152	1.39674
Tetradecanedioic acid	FA	257.175	258.183	[M-H]-	C14H26O4	0.919743	0.0509384	0.56364	0.471499	0.723442	0.880871	0.788497	0.329845	0.786808
Carbamoyl phosphate	Organic acid And Its derivatives	139.975	140.983	[M-H]-	CH4NO5P	1.25972	0.00170192	0.668963	1.50863	2.71602e-05	0.465776	2.17131	0.00877628	0.732401
O-Acetyl-L-serine	Amino acid and Its metabolomics	146.045	147.053	[M-H]-	C5H9NO4	0.739717	0.0598777	0.882545	0.259823	0.496576	0.954955	0.871483	0.259848	1.08249
Porphobilinogen	Organic acid And Its derivatives	225.088	226.095	[M-H]-	C10H14N2O4	0.115485	0.63468	1.04235	0.0389496	0.981849	0.998208	0.538731	0.481863	1.05757
2-Hydroxy HippuricAcid	Benzene and substituted derivatives	194.045	195.053	[M-H]-	C9H9NO4	0.506958	0.181342	0.730607	0.520679	0.199562	0.701547	0.642915	0.886911	1.03931
Succinic anhydride	Organic acid And Its derivatives	99.0082	100.016	[M-H]-	C4H4O3	0.228452	0.811635	0.959613	0.11085	0.873837	0.975077	0.274603	0.765376	1.04478
Indoleacetaldehyde	Heterocyclic compounds	158.061	159.068	[M-H]-	C10H9NO	1.10548	0.00559755	1.22571	0.357638	0.42871	1.05285	1.84481	0.0366978	1.16931
D-Xylulose 5-phosphate	Carboxylic acids and derivatives	229.011	230.019	[M-H]-	C5H11O8P	0.237245	0.741845	1.04627	0.639584	0.0934854	1.29482	1.03894	0.295383	1.17737
Hexadecanedioic acid	FA	285.207	286.214	[M-H]-	C16H30O4	0.847618	0.0371448	0.63467	0.451647	0.306073	0.812696	1.25189	0.2041	0.753123
Gamma-Glu-Leu	Amino acid and Its metabolomics	259.129	260.137	[M-H]-	C11H20N2O5	0.138131	0.731248	0.964518	0.925029	0.0175737	0.763258	1.56791	0.055096	1.21367
Isopropyl myristate	Aldehyde,Ketones,Esters	269.248	270.256	[M-H]-	C17H34O2	0.834689	0.00236429	0.351583	0.662641	0.629415	0.860798	0.25577	0.95371	1.01635
Ethylsalicylate	Organic acid And Its derivatives	165.055	166.063	[M-H]-	C9H10O3	0.273362	0.559645	1.01298	0.143967	0.72836	0.989771	0.412777	0.625193	0.984857
Octadecanamide	Alcohol and amines	282.28	283.288	[M-H]-	C18H37NO	0.609626	0.0857137	1.18298	0.89374	0.016065	1.40321	1.01128	0.19243	1.20149
Oxaloacetic acid	Organic acid And Its derivatives	130.998	132.07	[M-H]-	C4H4O5	0.256738	0.523081	1.13432	0.580505	0.0843352	1.33409	0.486539	0.727342	1.05801
4-Tert-butylphenol	Benzene and substituted derivatives	149.097	150.105	[M-H]-	C10H14O	0.260738	0.481932	1.02671	0.615739	0.137705	1.05348	0.44028	0.605155	1.01857
N-(2-Methylbenzoyl)glycine	Amino acid and Its metabolomics	192.066	193.074	[M-H]-	C10H11NO3	0.316234	0.262068	1.22656	1.04613	0.00613099	1.44802	0.970747	0.296566	1.16597
2,4-Hexadienoic acid	Organic acid And Its derivatives	111.045	112.052	[M-H]-	C6H8O2	0.210342	0.559631	1.05333	1.12659	0.000597572	1.51699	1.5382	0.0723833	1.20003
Ricinoleic acid	FA	297.243	298.251	[M-H]-	C18H34O3	0.165011	0.790712	0.991148	1.40553	1.05192e-05	1.20368	1.4871	0.0483628	0.929561
2-(Methylthio)ethanol	Alcohol and amines	91.0218	92.0296	[M-H]-	C3H8OS	0.587383	0.131284	1.08956	1.02946	0.00598064	1.17754	0.710899	0.306411	0.947982
4-Hydroxybenzyl alcohol	Benzene and substituted derivatives	123.045	124.052	[M-H]-	C7H8O2	0.816961	0.0253254	0.775714	1.22248	0.00150929	0.659648	0.807667	0.227664	0.886183
Methylparaben	Benzene and substituted derivatives	151.04	152.047	[M-H]-	C8H8O3	0.746009	0.0851908	0.846791	0.63385	0.112993	0.845014	0.159113	0.829404	1.02196
(±)12-HEPE [(±)-12-hydroxy-5Z,8Z,10E,14Z,17Z-eicosapentaenoic acid]	Oxidized lipids	317.212	318.219	[M-H]-	C20H30O3	0.898703	0.0321036	0.633925	1.36521	0.000318548	0.254313	1.68351	0.0602367	0.687798
(±)12-HETE [(±)12-hydroxy-5Z,8Z,10E,14Z-eicosatetraenoic acid]	Oxidized lipids	319.227	320.235	[M-H]-	C20H32O3	0.620832	0.08129	0.863964	1.50016	2.51493e-08	0.273321	1.81577	0.0278724	0.803873
(±)15-HEPE [(±)-15-hydroxy-5Z,8Z,11Z,13E,17Z-eicosapentaenoic acid]	Oxidized lipids	317.212	318.219	[M-H]-	C20H30O3	0.898703	0.0321036	0.633925	1.36521	0.000318548	0.254313	1.68351	0.0602367	0.687798
(±)16-HETE [(±)16-hydroxy-5Z,8Z,11Z,14Z-eicosatetraenoic acid]	Oxidized lipids	319.227	320.235	[M-H]-	C20H32O3	0.657462	0.0894028	0.864288	1.48256	1.43426e-08	0.285046	1.88371	0.0282987	0.805059
(±)17-HDHA [(±)17-hydroxy-4Z,7Z,10Z,13Z,15E,19Z-docosahexaenoic acid]	Oxidized lipids	343.227	344.235	[M-H]-	C22H32O3	0.616375	0.0752208	0.753217	1.464	5.71953e-05	0.233963	1.56301	0.0521673	0.72464
(±)17-HETE [(±)17-hydroxy-5Z,8Z,11Z,14Z-eicosatetraenoic acid]	Oxidized lipids	319.227	320.235	[M-H]-	C20H32O3	0.0276622	0.594314	0.921234	0.140788	0.585982	0.916358	1.59182	0.0877511	0.734978
(±)18-HEPE [(±)-18-hydroxy-5Z,8Z,11Z,14Z,16E-eicosapentaenoic acid]	Oxidized lipids	317.212	318.219	[M-H]-	C20H30O3	0.898703	0.0321036	0.633925	1.36521	0.000318548	0.254313	1.68351	0.0602367	0.687798
(±)18-HETE [(±)18-hydroxy-5Z,8Z,11Z,14Z-eicosatetraenoic acid]	Oxidized lipids	319.227	320.235	[M-H]-	C20H32O3	0.0276622	0.594314	0.921234	0.140788	0.585982	0.916358	1.59182	0.0877511	0.734978
(±)4-HDHA [(±)4-hydroxy-5E,7Z,10Z,13Z,16Z,19Z-docosahexaenoic acid]	Oxidized lipids	343.227	344.235	[M-H]-	C22H32O3	1.22854	0.000377605	1.48455	0.226488	0.397664	1.11566	1.4911	0.0663202	0.823491
(±)5-HETE [(±)5-hydroxy-6E,8Z,11Z,14Z-eicosatetraenoic acid]	Oxidized lipids	319.227	320.235	[M-H]-	C20H32O3	1.1975	0.00376673	1.46985	0.45628	0.331216	0.901313	1.51939	0.0524786	0.835636
(±)9-HETE [(±)-9-hydroxy-5Z,7E,11Z,14Z-eicosatetraenoic acid]	Oxidized lipids	319.227	320.235	[M-H]-	C20H32O3	1.1975	0.00376673	1.46985	0.45628	0.331216	0.901313	1.51939	0.0524786	0.835636
11,12-EET [(±)11,(12)-epoxy-5Z,8Z,14Z-eicosatrienoic acid]	Oxidized lipids	319.227	320.235	[M-H]-	C20H32O3	0.642942	0.0785245	0.866064	1.62431	1.51001e-08	0.299769	1.8812	0.0204494	0.793753
12,13-EpOME [(±)12(13)epoxy-9Z-octadecenoic acid]	Oxidized lipids	295.227	296.235	[M-H]-	C18H32O3	1.01634	0.0103887	0.688824	0.0252963	0.824736	0.973988	1.01215	0.190887	0.853937
14(S)-HDHA [14S-hydroxy-4Z,7Z,10Z,12E,16Z,19Z-docosahexaenoic acid]	Oxidized lipids	343.227	344.235	[M-H]-	C22H32O3	0.746946	0.0433779	0.698609	1.41245	0.000111043	0.248184	1.64522	0.0454396	0.701145
5,6-DiHETrE [(±)5,6-dihydroxy-8Z,11Z,14Z-eicosatrienoic acid]	Oxidized lipids	337.238	338.246	[M-H]-	C20H34O4	1.26737	0.00377529	1.51286	0.342643	0.412276	1.18506	1.29423	0.0759401	0.835171
5-HETrE [5S-hydroxy-6E,8Z,11Z-eicosatrienoic acid]	Oxidized lipids	321.243	322.251	[M-H]-	C20H34O3	0.44104	0.206745	0.874748	1.10649	0.0051819	0.653834	2.16966	0.00858027	0.698489
9,10-EpOME [(±)9,10-epoxy-12Z-octadecenoic acid]	Oxidized lipids	295.227	296.235	[M-H]-	C18H32O3	1.01634	0.0103887	0.688824	0.0252963	0.824736	0.973988	1.01215	0.190887	0.853937
Myristic acid	FA	227.201	228.37	[M-H]-	C14H28O2	0.341303	0.392133	0.893869	0.188885	0.613189	0.94155	0.550111	0.366827	0.906357
Myoinositol	Carboxylic acids and derivatives	179.056	180.16	[M-H]-	C6H12O6	1.01895	0.00502356	0.745066	1.32007	0.000126075	0.641323	0.421355	0.721925	0.966603
N-acetyl-beta-alanine	Amino acid and Its metabolomics	130.05	131.058	[M-H]-	C5H9NO3	0.131175	0.474722	0.936032	0.543738	0.209567	0.84628	0.224515	0.695081	0.96053
3-Hydroxyglutaric acid	Organic acid And Its derivatives	147.029	148.037	[M-H]-	C5H8O5	0.0227824	0.652404	0.947486	0.767028	0.048544	0.7388	0.718068	0.661769	1.05619
7-ketodeoxycholic acid	Hormones and hormone related compunds	405.264	406.272	[M-H]-	C24H38O5	0.473042	0.495626	1.69598	0.293503	0.53512	0.644336	0.318898	0.411836	0.521535
N-acetylornithine	Organic acid And Its derivatives	173.093	174.1	[M-H]-	C7H14N2O3	0.153693	0.591651	0.945185	0.585964	0.223338	0.866238	1.04415	0.207597	0.869866
N-Methyl-L-Glutamate	Amino acid and Its metabolomics	160.061	161.069	[M-H]-	C6H11NO4	0.530526	0.171403	0.868462	0.844732	0.0422144	0.79818	1.08912	0.230927	0.888003
N-Alpha-Acetyl-L-Asparagine	Amino acid and Its metabolomics	173.056	174.064	[M-H]-	C6H10N2O4	0.484973	0.245117	0.853864	1.16516	0.00246085	0.619391	0.150517	0.948908	1.0086
3-Ureidopropionate	Organic acid And Its derivatives	131.046	132.054	[M-H]-	C4H8N2O3	0.919786	0.0483038	0.678523	0.933212	0.062066	0.635995	1.16795	0.196542	0.791692
Indole-3-Pyruvic Acid	Organic acid And Its derivatives	202.05	203.058	[M-H]-	C11H9NO3	0.79995	0.0733492	1.22614	0.691155	0.112881	1.24105	1.79268	0.0198173	1.37371
Inosine	Nucleotide And Its metabolomics	267.073	268.081	[M-H]-	C10H12N4O5	0.684116	0.0169485	2.03456	0.082103	0.0789261	0.465667	0.0749285	0.994712	1.00229
Phosphoenolpyruvate	Organic acid And Its derivatives	166.975	167.982	[M-H]-	C3H5O6P	0.325359	0.39564	0.963355	0.23425	0.533175	0.974694	1.06509	0.179597	1.04276
Uric acid	Organic acid And Its derivatives	167.021	168.028	[M-H]-	C5H4N4O3	0.394479	0.873929	1.02618	0.986535	0.0129359	0.526543	0.483516	0.968098	0.993052
3-hydroxyphenylacetic acid	Organic acid And Its derivatives	151.04	152.047	[M-H]-	C8H8O3	0.55881	0.162553	1.29409	0.000158079	0.915348	1.01841	0.234795	0.987415	1.00336
5,6-Dimethylbenzimidazole	Heterocyclic compounds	145.077	146.084	[M-H]-	C9H10N2	0.932566	0.0297251	1.14299	0.336223	0.444341	1.04671	1.74088	0.0468478	1.13055
13(R)-HODE	Oxidized lipids	295.2	296.235	[M-H]-	C18H32O3	1.27927	0.00125523	0.542252	1.58107	1.85946e-05	0.215248	1.99314	0.0308874	0.68714
Indole-4-carboxaldehyde	Heterocyclic compounds	144.045	145.053	[M-H]-	C9H7NO	0.837381	0.0303793	1.2964	0.791792	0.0538386	1.24645	2.00006	0.0123373	1.34843
9(S)-HpOTrE	Oxidized lipids	309.207	310.214	[M-H]-	C18H30O4	0.34809	0.331306	0.815519	0.0525618	0.706793	1.10171	1.3556	0.138761	0.721977
(S) -2-Hydroxyglutaric acid	Organic acid And Its derivatives	147.029	148.037	[M-H]-	C5H8O5	1.2917	0.000311889	0.638506	1.0665	0.00421407	0.590182	0.840367	0.319567	1.09606
L-Isoisoleucine	Amino acid and Its metabolomics	130.087	131.095	[M-H]-	C6H13NO2	0.455622	0.251005	0.89088	0.800033	0.0336059	0.826672	1.86478	0.0129366	1.21724
Homo-Gamma-Linolenic Acid	Organic acid And Its derivatives	305.248	306.256	[M-H]-	C20H34O2	1.23173	0.000248671	1.5228	0.617384	0.135506	1.20826	2.3835	0.000938621	1.39521
9,12-octadecadienoic acid	FA	275.201	276.209	[M-H]-	C18H28O2	1.46808	4.99662e-05	0.411416	1.46648	3.95583e-06	0.253804	2.02188	0.0138154	0.67127
13-HpODE	Oxidized lipids	311.222	312.23	[M-H]-	C18H32O4	0.423904	0.341691	1.31624	0.88829	0.0322485	1.94833	1.11122	0.227676	0.715361
Alpha-Mercholic Acid	Bile acids	407.28	408.288	[M-H]-	C24H40O5	0.619464	0.431913	1.64753	0.642833	0.396648	1.45945	0.543934	0.163367	0.363796
Cis-9,10-epoxystearic acid	FA	297.243	298.251	[M-H]-	C18H34O3	0.322164	0.380314	1.10039	0.602251	0.0903745	1.28207	1.70787	0.043957	0.800292
(4E,7E,10Z,13E,16E,19E) -docosa-4,7,10,13,16,19-hexanoic acid	Oxidized lipids	327.232	328.24	[M-H]-	C22H32O2	1.61736	6.52152e-09	1.84494	1.33591	0.000383187	1.52126	3.19709	1.11188e-06	1.84569
12,13-DiHOME	Oxidized lipids	313.238	314.246	[M-H]-	C18H34O4	0.0996208	0.667894	0.955229	0.0891676	0.979868	1.00245	2.11986	0.00875825	0.70479
1-cis-heptadeenoic acid(17: 1n7)	FA	267.232	268.24	[M-H]-	C17H32O2	0.407682	0.324003	0.905875	0.346976	0.392228	0.924575	0.582907	0.25728	0.908576
4-acetoxyphenol	Benzene and substituted derivatives	151.026	152.047	[M-H]-	C8H8O3	0.50821	0.0195935	1.74132	0.113483	0.0420727	0.434041	0.311695	0.587197	0.845832
2-ethyl-2-hydroxybutyric acid	Organic acid And Its derivatives	131.071	132.079	[M-H]-	C6H12O3	1.33917	5.90179e-05	0.454882	1.09142	0.00130903	0.496078	0.787433	0.323622	0.875895
7-ketolithocholic acid	Bile acids	389.269	390.277	[M-H]-	C24H38O4	0.507261	0.732897	1.21565	0.665218	0.302282	1.7591	0.317792	0.312895	0.422452
1,11-undecylic acid	Organic acid And Its derivatives	243.2	244.167	[M-H]-	C13H24O4	0.206098	0.667185	0.98189	0.361568	0.428021	1.02772	0.0617461	0.989193	1.00048
16-Hydroxyhexadecanoic acid	FA	271.227	272.235	[M-H]-	C16H32O3	0.462099	0.241757	1.15131	0.450249	0.198126	1.34483	1.37695	0.0365308	0.78931
12-ketolithocholic acid	Bile acids	389.269	390.277	[M-H]-	C24H38O4	0.507261	0.732897	1.21565	0.665218	0.302282	1.7591	0.317792	0.312895	0.422452
L-arabinonic acid-1,4-lactone	Carboxylic acids and derivatives	147.029	148.037	[M-H]-	C5H8O5	0.0227824	0.652404	0.947486	0.767028	0.048544	0.7388	0.718068	0.661769	1.05619
23-deoxydeoxycholic acid	Bile acids	377.269	378.277	[M-H]-	C23H38O4	0.776163	0.0932313	0.527334	0.0578373	0.815167	0.93482	0.220273	0.894746	1.04421
N,N′-dicyclohexylcarbodiimide	Alcohol and amines	205.17	206.178	[M-H]-	C13H22N2	1.11866	0.0023517	0.878764	0.852547	0.0268729	0.916784	1.65044	0.048103	0.931541
Gamma-Mercholic Acid	Bile acids	407.28	408.288	[M-H]-	C24H40O5	0.380461	0.733904	1.36576	0.257921	0.317079	0.337548	0.660937	0.251927	0.232558
Erythrose	Carboxylic acids and derivatives	119.034	120.042	[M-H]-	C4H8O4	0.78162	0.0516585	0.698289	0.242613	0.387379	0.868325	1.27171	0.205146	1.19304
Heparin	Alcohol and amines	315.29	316.298	[M-H]-	C19H40O3	0.483037	0.0921513	1.45568	0.840754	0.0577288	1.82346	0.608428	0.357181	0.82271
DL-2-hydroxystearic acid	FA	299.259	300.266	[M-H]-	C18H36O3	1.37401	0.000405292	1.84844	1.27492	0.00160791	1.74619	2.95751	8.08416e-05	1.85965
Orthocholic acid	Bile acids	389.269	390.277	[M-H]-	C24H38O4	0.303888	0.814132	1.12683	0.495535	0.301778	1.66843	1.30338	0.266144	0.456383
P-chlorophenylalanine	Benzene and substituted derivatives	198.032	199.04	[M-H]-	C9H10ClNO2	0.663869	0.0826044	1.04293	0.466688	0.23996	1.02948	0.725994	0.469116	1.01588
2-hydroxyhexadecanoic acid	FA	271.227	272.235	[M-H]-	C16H32O3	1.50413	7.71029e-06	1.77223	1.05465	0.00440606	1.48482	3.03207	3.77564e-06	1.81595
Indole-3-carboxylic acid	Heterocyclic compounds	160.04	161.048	[M-H]-	C9H7NO2	0.642542	0.166769	1.09893	0.296101	0.451054	1.04788	0.878272	0.286815	1.09797
20-Carboxyarachidonic acid	Oxidized lipids	333.207	334.214	[M-H]-	C20H30O4	0.408387	0.646238	1.08424	0.44574	0.244452	1.33434	0.324333	0.570056	0.900558
8,11-icosadienoic acid	FA	303.2	304.24	[M-H]-	C20H32O2	1.62664	4.31988e-09	2.02879	1.38674	2.71065e-05	1.4857	3.12285	2.22565e-07	1.74214
cis-1-Pentadecenoic Acid(C15: 1)	FA	239.201	240.209	[M-H]-	C15H28O2	1.27429	0.000248963	1.75916	1.19865	0.000383095	1.66732	2.28444	0.00319194	1.50532
4-Hydroxybenzoic Acid	Benzene and substituted derivatives	137.024	138.032	[M-H]-	C7H6O3	0.786206	0.0497735	0.886017	1.10086	0.0049841	0.774679	0.254933	0.706887	1.02863
Multifidol	Benzene and substituted derivatives	209.081	210.089	[M-H]-	C11H14O4	1.09458	0.0330579	0.507031	1.21587	0.0132693	0.426771	0.396344	0.444013	0.842605
2-(4-hydroxyphenyl) propionate	Benzene and substituted derivatives	165.06	166.063	[M-H]-	C9H10O3	0.52793	0.088412	0.434146	0.902764	0.213932	0.472206	0.817626	0.4972	1.28017
Bis(1-inositol) -3,1'-phosphate 1-phosphate	Alcohol and amines	501	502.049	[M-H]-	C12H24O17P2	0.449742	0.252844	0.901848	1.31329	0.000145398	0.587858	1.87539	0.0201072	0.771435
2-amino-4-oxovaleric acid	Organic acid And Its derivatives	130.05	131.058	[M-H]-	C5H9NO3	0.131175	0.474722	0.936032	0.543738	0.209567	0.84628	0.224515	0.695081	0.96053
Furfural diacetal	Others	169.086	170.094	[M-H]-	C9H14O3	0.35542	0.43005	1.03579	0.432127	0.299789	1.04379	0.349559	0.67803	0.981365
2-Oxo-2,3-dihydrofuran-5-acetate	Aldehyde,Ketones,Esters	141.019	142.027	[M-H]-	C6H6O4	1.1807	0.00143029	1.38651	0.210998	0.559271	1.06098	1.58977	0.067188	1.17487
L-2-amino-6-oximelic acid	Organic acid And Its derivatives	188.057	189.064	[M-H]-	C7H11NO5	0.944672	0.0528397	0.669968	1.10058	0.0107495	0.509153	0.289573	0.941756	0.988137
3-(pyrazol-1-yl) -L-alanine	Amino acid and Its metabolomics	154.062	155.069	[M-H]-	C6H9N3O2	0.11214	0.647158	0.971911	0.202795	0.650454	0.972629	0.577048	0.504385	1.04338
1-pyrroline-4-hydroxy-2-carboxylate	Heterocyclic compounds	128.035	129.043	[M-H]-	C5H7NO3	0.527496	0.274998	1.12087	0.972381	0.0133959	0.699782	0.807783	0.299656	0.905497
PysoPE 22:4(2n isomer1)	GP	528.31	529.302	[M-H]-	C27H48NO7P	0.320839	0.689029	0.964921	1.48844	6.47669e-07	0.515043	0.5576	0.468553	1.05257
PysoPE 22:4	GP	528.31	529.302	[M-H]-	C27H48NO7P	0.320839	0.689029	0.964921	1.48844	6.47669e-07	0.515043	0.5576	0.468553	1.05257
PysoPE 22:5(2n isomer3)	GP	526.296	527.302	[M-H]-	C27H46NO7P	0.948411	0.0185895	0.777736	1.60831	2.66581e-06	0.371522	0.0305869	0.981598	0.997713
PysoPE 22:5(2n isomer2)	GP	526.296	527.302	[M-H]-	C27H46NO7P	0.948411	0.0185895	0.777736	1.60831	2.66581e-06	0.371522	0.0305869	0.981598	0.997713
PysoPE 22:5(2n isomer1)	GP	526.296	527.302	[M-H]-	C27H46NO7P	0.948411	0.0185895	0.777736	1.60831	2.66581e-06	0.371522	0.0305869	0.981598	0.997713
PysoPE 22:6(2n isomer1)	GP	524.279	525.285	[M-H]-	C27H44NO7P	1.32467	0.000196686	0.757294	1.65156	4.79405e-08	0.467227	0.908632	0.250171	1.05463
PysoPE 22:6	GP	524.279	525.285	[M-H]-	C27H44NO7P	1.32467	0.000196686	0.757294	1.65156	4.79405e-08	0.467227	0.908632	0.250171	1.05463
PysoPE 20:2(2n isomer1)	GP	504.311	505.296	[M-H]-	C25H48NO7P	0.0699757	0.858036	1.01908	0.740179	0.125347	0.807702	1.08962	0.185952	1.08999
PysoPE 20:2	GP	504.311	505.296	[M-H]-	C25H48NO7P	0.0699757	0.858036	1.01908	0.740179	0.125347	0.807702	1.08962	0.185952	1.08999
PysoPE 20:3(2n isomer1)	GP	502.295	503.296	[M-H]-	C25H46NO7P	0.149979	0.458774	1.08116	1.30541	0.000315538	0.572878	0.144275	0.822616	0.986083
PysoPE 20:3	GP	502.295	503.296	[M-H]-	C25H46NO7P	0.149979	0.458774	1.08116	1.30541	0.000315538	0.572878	0.144275	0.822616	0.986083
PysoPE 20:4(2n isomer1)	GP	500.28	501.286	[M-H]-	C25H44NO7P	0.776378	0.0512235	0.917186	1.64799	1.42659e-11	0.57141	0.588166	0.619654	0.978697
PysoPE 20:5(2n isomer1)	GP	498.263	499.27	[M-H]-	C25H42NO7P	0.945707	0.0279982	0.783386	1.51713	1.06318e-05	0.493259	0.0366175	0.984991	0.998516
PysoPE 20:5	GP	498.263	499.27	[M-H]-	C25H42NO7P	0.945707	0.0279982	0.783386	1.51713	1.06318e-05	0.493259	0.0366175	0.984991	0.998516
PysoPE 18:0(2n isomer)	GP	480.309	481.3	[M-H]-	C23H48NO7P	0.455622	0.239646	1.11472	0.500153	0.189711	0.879943	2.23121	0.0018175	1.34483
PysoPE 18:2	GP	476.279	477.286	[M-H]-	C23H44NO7P	1.38927	3.55818e-05	0.76678	1.63154	5.63985e-10	0.522615	0.696754	0.518044	0.960473
PysoPE 18:3(2n isomer)	GP	474.264	475.27	[M-H]-	C23H42NO7P	1.28027	0.000273894	0.702214	1.66768	4.64985e-09	0.357486	0.354478	0.825246	0.980277
PysoPE 18:3	GP	474.262	475.27	[M-H]-	C23H42NO7P	1.29182	0.000205839	0.70292	1.66783	1.24465e-09	0.359757	0.359642	0.874066	0.9848
PysoPE 16:0(2n isomer)	GP	452.278	453.3	[M-H]-	C21H44NO7P	1.43303	0.000113276	0.692971	1.47118	1.72663e-05	0.627105	0.423906	0.569668	0.964706
PysoPE 16:1	GP	450.264	451.286	[M-H]-	C21H42NO7P	1.49866	1.99791e-05	0.590554	1.49245	1.07246e-06	0.475292	0.795962	0.430738	0.912891
Glycine linoleate	GL	336.254	337.262	[M-H]-	C20H35NO3	0.134226	0.894543	0.981847	0.30065	0.504148	0.898912	0.346887	0.580778	0.920852
15-methyl palmitic acid	FA	269.248	270.256	[M-H]-	C17H34O2	0.950062	0.0120406	0.642924	0.72666	0.051308	0.723797	1.6941	0.0511946	0.692563
1-Aminocyclohexanoic acid	Organic acid And Its derivatives	142.087	143.095	[M-H]-	C7H13NO2	0.828721	0.059237	1.36684	0.435392	0.444911	1.12213	2.15128	0.009118	1.59181
4-Hydroxy-3-methylbenzoic acid	Organic acid And Its derivatives	151	152.047	[M-H]-	C8H8O3	0.145607	0.719374	0.953625	0.238795	0.371944	1.14411	1.80805	0.024304	1.35258
2-Hydroxy-2-methylbutyric acid	Organic acid And Its derivatives	117	118.063	[M-H]-	C5H10O3	1.08034	0.0134373	0.7069	0.44284	0.319646	0.861719	2.01826	0.0100222	1.3988
(S)-Leucic acid	Organic acid And Its derivatives	131	132.079	[M-H]-	C6H12O3	1.2065	0.000786748	0.66336	0.927342	0.0128725	0.735293	2.81848	4.60759e-05	1.57881
5-Methoxytryptophan	Amino acid and Its metabolomics	190	191.095	[M-H]-	C11H13NO2	1.04509	0.00601869	0.688869	1.0997	0.00228529	0.638847	0.666295	0.49985	1.06742
L-Lysine	Amino acid and Its metabolomics	147	146.106	[M+H]+	C6H14N2O2	0.93977	0.0295254	1.21351	0.0897173	0.672527	1.05343	0.798075	0.223353	0.907156
L-Ornithine	Amino acid and Its metabolomics	133	168.067	[M-Cl]+	C5H13ClN2O2	0.623188	0.412968	1.12696	0.315757	0.354369	0.859515	0.0413692	0.648906	0.929903
L-Alanine	Amino acid and Its metabolomics	90.048	89.048	[M+H]+	C3H7NO2	0.161807	0.9051	0.981712	0.208334	0.775148	1.0462	0.0363238	0.695782	0.942446
L-Histidine	Amino acid and Its metabolomics	156.1	155.07	[M+H]+	C6H9N3O2	0.832621	0.062302	1.1358	0.039216	0.863215	0.989067	0.375764	0.770051	1.02047
L-Methionine	Amino acid and Its metabolomics	150	149.051	[M+H]+	C5H11NO2S	0.651584	0.0840107	0.812912	0.880072	0.0239033	0.742722	0.993152	0.122909	0.840652
L-Proline	Amino acid and Its metabolomics	116.1	115.063	[M+H]+	C5H9NO2	0.025021	0.856704	0.985863	0.983406	0.0131182	0.801019	0.42971	0.829993	1.01538
L-Tryptophan	Amino acid and Its metabolomics	205.1	204.09	[M+H]+	C11H12N2O2	0.959919	0.0293138	1.44443	0.120012	0.991045	0.998235	1.62969	0.109261	1.30792
L-Valine	Amino acid and Its metabolomics	118.1	117.079	[M+H]+	C5H11NO2	0.0669604	0.704438	0.961581	0.574486	0.156506	0.84624	0.748171	0.365261	1.09764
3-N-Methyl-L-Histidine	Amino acid and Its metabolomics	170	187.096	[M-H2O+H]+	C7H13N3O3	0.176702	0.817756	0.975114	0.577105	0.15133	1.17231	0.224567	0.713029	1.04355
5-Oxoproline	Amino acid and Its metabolomics	130	129.043	[M+H]+	C5H7NO3	0.142515	0.654672	1.09823	0.498575	0.30476	1.20107	0.641198	0.590074	1.08753
Betaine	Others	118.1	117.079	[M+H]+	C5H11NO2	0.321017	0.615605	1.06305	0.780106	0.0511623	1.26699	0.945966	0.461108	1.08065
Hexanoyl Glycine	Amino acid and Its metabolomics	174.1	173.105	[M+H]+	C8H15NO3	0.251592	0.575897	0.932088	0.791792	0.0499874	0.711392	0.196283	0.907276	1.01173
Histamine	Alcohol and amines	112.08	111.08	[M+H]+	C5H9N3	0.192248	0.859386	1.0286	0.722946	0.0331317	1.37745	0.913799	0.220913	1.22301
L-Saccharopine	Amino acid and Its metabolomics	277	276.132	[M+H]+	C11H20N2O6	0.0533121	0.994186	1.00075	0.19417	0.685073	0.954997	0.0199802	0.878521	0.987125
N,N-Dimethylglycine	Amino acid and Its metabolomics	104	103.063	[M+H]+	C4H9NO2	0.474869	0.245688	0.934047	1.3664	3.90374e-05	0.699921	0.747339	0.39685	0.946263
N-Acetylaspartate	Amino acid and Its metabolomics	176	175.048	[M+H]+	C6H9NO5	0.187601	0.802831	1.0642	0.529388	0.507947	0.870828	1.7495	0.0750171	0.74443
N-Acetyl-L-Glutamic Acid	Amino acid and Its metabolomics	190.1	189.064	[M+H]+	C7H11NO5	1.19895	0.00636595	0.624396	1.09298	0.00613259	0.603174	0.0722237	0.751585	0.962235
N-Acetylmannosamine	Carboxylic acids and derivatives	222	221.09	[M+H]+	C8H15NO6	0.589932	0.14522	0.865336	1.15524	0.00100903	0.649387	1.02775	0.222979	0.888394
Serotonin	Tryptamines,Cholines,Pigments	177	176.095	[M+H]+	C10H12N2O	0.421807	0.361284	0.93575	0.222484	0.643686	0.967774	2.22681	0.00319077	0.80252
S-Sulfo-L-Cysteine	Amino acid and Its metabolomics	202.2	200.977	[M+H]+	C3H7NO5S2	0.422991	0.448699	1.11146	0.111947	0.657335	0.933959	1.18211	0.14848	0.794613
Trans-4-Hydroxy-L-Proline	Amino acid and Its metabolomics	132.058	131.058	[M+H]+	C5H9NO3	0.282731	0.284344	1.18738	0.0790965	0.669372	1.0568	0.322171	0.737945	0.970158
Trimethylamine N-Oxide	Alcohol and amines	76	75.0684	[M+H]+	C3H9NO	0.999616	0.00657926	0.633606	0.475268	0.490168	0.860501	0.604004	0.422914	0.90262
Urea	Alcohol and amines	61	60.032	[M+H]+	CH4N2O	1.23378	0.000417484	0.796669	1.14551	0.00110444	0.786779	0.575517	0.458105	0.963464
L-Alanyl-L-Lysine	Amino acid and Its metabolomics	218.1	217.14	[M+H]+	C9H19N3O3	0.564303	0.157422	1.32154	0.43314	0.21309	1.29739	1.22073	0.255117	1.15144
N-Acetylhistamine	Alcohol and amines	154.1	153.1	[M+H]+	C7H11N3O	0.51325	0.0305338	1.72168	0.0757975	0.0420629	0.443539	0.0829326	0.44202	0.785861
P-Coumaric Acid	Benzene and substituted derivatives	165.047	164.047	[M+H]+	C9H8O3	0.241546	0.395093	0.892178	0.622846	0.117423	0.808017	0.496315	0.391466	0.895357
Benzoic Acid	Benzene and substituted derivatives	123.037	122.037	[M+H]+	C7H6O2	0.620935	0.985129	1.00545	0.59046	0.827336	1.0662	1.0659	0.954148	1.01747
3-(4-Hydroxyphenyl)-Propionic Acid	Benzene and substituted derivatives	167.063	166.063	[M+H]+	C9H10O3	0.705068	0.106905	0.855235	0.0995663	0.914409	0.989201	1.38739	0.102387	0.866542
1,4-Dihydro-1-Methyl-4-Oxo-3-Pyridinecarboxamide	Heterocyclic compounds	153.06	152.059	[M+H]+	C7H8N2O2	0.500966	0.0172052	1.84081	0.138244	0.0381309	0.436384	0.052291	0.512185	0.817402
4-Pyridoxic Acid	Heterocyclic compounds	184.05	183.053	[M+H]+	C8H9NO4	0.3757	0.638601	1.05759	0.883535	0.0287563	0.707467	1.26348	0.0945607	0.780888
Choline	Tryptamines,Cholines,Pigments	105.11	104.108	[M+H]+	C5H14NO+	0.438716	0.336274	1.05187	0.931601	0.0265883	0.799085	1.80599	0.0424949	0.866156
Putrescine	Alcohol and amines	89	88.1	[M+H]+	C4H12N2	0.717634	0.113121	1.32064	0.458044	0.276221	1.34941	0.185227	0.886511	0.992956
Phenethylamine	Alcohol and amines	122.1	121.089	[M+H]+	C8H11N	0.53702	0.146178	0.938721	0.841438	0.0332732	0.897612	0.750018	0.500859	1.03109
Biotin	CoEnzyme and vitamins	245.09	244.088	[M+H]+	C10H16N2O3S	0.570143	0.173635	0.754353	0.746665	0.151696	0.692366	0.999137	0.12364	0.755055
1,7-Dimethylxanthine	Nucleotide And Its metabolomics	181.1	180.065	[M+H]+	C7H8N4O2	0.777973	0.101403	1.31958	0.0586523	0.964791	1.00861	1.76586	0.0725782	1.35064
2'-Deoxyinosine	Nucleotide And Its metabolomics	253.1	252.086	[M+H]+	C10H12N4O4	0.305944	0.492466	1.15087	1.19632	0.000155528	0.169528	0.296863	0.707534	0.921459
2-Hydroxy-6-Aminopurine	Nucleotide And Its metabolomics	152.1	151.049	[M+H]+	C5H5N5O	0.312746	0.683268	1.06087	0.45424	0.281501	0.82781	0.440405	0.915744	1.01456
Adenine	Nucleotide And Its metabolomics	136.1	135.055	[M+H]+	C5H5N5	0.225488	0.474141	0.912478	0.591877	0.141786	0.83302	0.137394	0.66118	0.948591
Adenosine	Nucleotide And Its metabolomics	268.097	267.097	[M+H]+	C10H13N5O4	0.82144	0.0381535	1.26326	1.70323	5.922e-05	72.3115	1.42816	0.206557	2.19687
Cytidine	Nucleotide And Its metabolomics	244.086	243.086	[M+H]+	C9H13N3O5	0.355532	0.390472	1.13478	0.389303	0.40028	0.880806	0.353181	0.74695	1.03947
Cytosine	Nucleotide And Its metabolomics	112	111.043	[M+H]+	C4H5N3O	0.404992	0.378914	0.939984	1.10573	0.00633058	0.753421	0.704059	0.382144	1.06619
Guanosine	Nucleotide And Its metabolomics	284.092	283.092	[M+H]+	C10H13N5O5	0.354223	0.673192	1.14776	0.368385	0.629565	0.865114	0.86048	0.195256	1.48378
Hypoxanthine	Nucleotide And Its metabolomics	137	136.039	[M+H]+	C5H4N4O	0.534047	0.0110365	1.95653	0.116696	0.04661	0.421927	0.428263	0.674659	0.871558
Thymine	Nucleotide And Its metabolomics	127	126.043	[M+H]+	C5H6N2O2	0.714387	0.0526451	0.688835	1.29092	0.00303437	0.475813	1.47368	0.0546495	0.704359
3,3',5-Triiodo-L-Thyronine	Hormones and hormone related compunds	651.7	650.79	[M+H]+	C15H12I3NO4	1.22748	0.000509258	1.7915	1.09711	0.00224489	1.50749	0.547316	0.504398	1.07371
L-Thyroxine	Hormones and hormone related compunds	777.687	776.687	[M+H]+	C15H11I4NO4	1.2219	0.000673863	1.49849	1.38092	2.4595e-05	1.52825	1.93753	0.0143495	1.1892
Cis-Aconitic Acid	Organic acid And Its derivatives	175.016	174.016	[M+H]+	C6H6O6	0.146637	0.961778	0.994655	0.018257	0.959494	1.00459	0.458128	0.572295	1.04907
N-Methyltryptamine	Tryptamines,Cholines,Pigments	175	174.116	[M+H]+	C11H14N2	1.30888	2.30612e-05	4.76273	1.33271	0.00422644	8.44891	1.83843	0.0158278	3.03168
N-Acetyl-D-Glucosamine	Carboxylic acids and derivatives	222	221.09	[M+H]+	C8H15NO6	0.589932	0.14522	0.865336	1.15524	0.00100903	0.649387	1.02775	0.222979	0.888394
D-Glucono-1,5-Lactone	Carboxylic acids and derivatives	179.048	178.048	[M+H]+	C6H10O6	0.457608	0.222647	0.831722	0.248288	0.421084	0.897604	1.81273	0.0232162	0.689632
L-Gulonolactone	Carboxylic acids and derivatives	179.048	178.048	[M+H]+	C6H10O6	0.457608	0.222647	0.831722	0.248288	0.421084	0.897604	1.81273	0.0232162	0.689632
L-Ascorbate	CoEnzyme and vitamins	177	176.032	[M+H]+	C6H8O6	0.154049	0.64213	0.956089	0.251542	0.519082	1.06914	0.190647	0.793588	0.974456
Nicotinamide	CoEnzyme and vitamins	123.1	122.1	[M+H]+	C6H6N2O	0.258601	0.534291	1.11161	0.644313	0.114396	1.22338	0.35462	0.701461	1.0534
Nicotinamide-N-Oxide	CoEnzyme and vitamins	139	138.043	[M+H]+	C6H6N2O2	0.235186	0.588037	1.1076	0.243502	0.834627	1.04041	0.329749	0.886076	1.02703
Nicotinic Acid	CoEnzyme and vitamins	124	123.032	[M+H]+	C6H5NO2	0.366997	0.691793	1.05751	0.00440643	0.740927	0.955485	0.428251	0.921413	1.01394
Pantothenol	CoEnzyme and vitamins	206.13	205.131	[M+H]+	C9H19NO4	0.179882	0.370127	0.606528	0.32821	0.596486	0.772683	0.273035	0.45856	0.670786
Trigonelline	CoEnzyme and vitamins	138	137.048	[M+H]+	C7H7NO2	0.681995	0.0562623	1.66825	1.12718	0.00429381	2.27773	0.556566	0.594813	1.09669
3-Indolebutyric Acid	Heterocyclic compounds	204.1	203.095	[M+H]+	C12H13NO2	1.18218	0.000683356	1.79865	1.15728	0.0324678	3.84795	0.761608	0.344038	1.21512
3-Indolepropionic Acid	Heterocyclic compounds	190.08	189.079	[M+H]+	C11H11NO2	1.34878	0.00040357	2.298	1.26577	0.0284775	5.01197	1.25884	0.129505	1.41818
Indole-2-Carboxylic Acid	Heterocyclic compounds	162.05	161.048	[M+H]+	C9H7NO2	0.351345	0.284545	0.891456	1.02783	0.00836149	0.700524	0.0794609	0.764674	0.968451
Indole-3-Acetic Acid	Heterocyclic compounds	176.1	175.063	[M+H]+	C10H9NO2	0.979795	0.0193581	1.17919	0.137936	0.791732	1.01711	1.01784	0.335858	1.0655
Indole-3-Carboxaldehyde	Heterocyclic compounds	146.1	145.053	[M+H]+	C9H7NO	1.2916	0.00134327	0.709636	1.21534	0.00111916	0.657477	1.24867	0.1781	1.11474
Methyl Indole-3-Acetate	Heterocyclic compounds	190.1	189.079	[M+H]+	C11H11NO2	1.07671	0.00386069	1.80356	1.33082	9.58898e-05	2.07581	2.07556	0.0079832	1.83882
1,3-Diaminopropane	Alcohol and amines	75	74.084	[M+H]+	C3H10N2	0.261251	0.783638	1.03213	0.294589	0.430626	0.906235	0.746334	0.283588	0.875908
3,4,5-Trimethoxycinnamic Acid	Organic acid And Its derivatives	239.084	238.084	[M+H]+	C12H14O5	0.965445	0.0017867	0.256686	0.783798	0.00393271	0.336027	0.822111	0.618838	1.10112
4-Guanidinobutyric Acid	Organic acid And Its derivatives	146.085	145.085	[M+H]+	C5H11N3O2	0.400117	0.240078	1.17025	0.926534	0.0192435	1.59208	1.04212	0.301823	1.10826
6-Aminocaproic Acid	Amino acid and Its metabolomics	132.095	131.095	[M+H]+	C6H13NO2	0.567469	0.116969	0.870914	0.881536	0.0195023	0.805107	1.81062	0.0153543	1.19457
7-Methyluric Acid	Amino acid and Its metabolomics	183	182.044	[M+H]+	C6H6N4O3	0.0292334	0.928698	1.00311	0.302196	0.533496	1.02431	0.538522	0.49389	1.02736
Creatinine	Organic acid And Its derivatives	114.059	113.059	[M+H]+	C4H7N3O	0.283316	0.51785	0.936635	0.818125	0.0297839	0.789131	0.548469	0.704393	0.95033
Dl-2-Aminooctanoic Acid	Organic acid And Its derivatives	160.126	159.126	[M+H]+	C8H17NO2	0.224766	0.707982	0.964983	0.597398	0.245594	0.865612	1.63588	0.035246	0.858253
Kinurenine	Amino acid and Its metabolomics	209.1	208.085	[M+H]+	C10H12N2O3	0.183848	0.612957	0.936302	0.734146	0.0821688	0.775487	1.60031	0.0913293	1.21337
Kynurenic Acid	Amino acid and Its metabolomics	190.043	189.043	[M+H]+	C10H7NO3	0.946215	0.0278483	1.19565	0.173163	0.801984	1.01932	1.16913	0.228436	1.10462
L-Homoserine	Organic acid And Its derivatives	120.1	119.058	[M+H]+	C4H9NO3	0.337726	0.430856	1.15155	0.253134	0.595753	1.08208	0.667164	0.514469	1.11142
Maleic Acid	Organic acid And Its derivatives	117.011	116.011	[M+H]+	C4H4O4	0.357175	0.276657	0.91132	1.06123	0.010054	0.766952	0.631976	0.725073	1.02897
N'-Formylkynurenine	Amino acid and Its metabolomics	237.1	236.08	[M+H]+	C11H12N2O4	0.732945	0.0767249	1.29727	1.27061	0.00013523	1.97675	1.49323	0.0863869	1.26291
Lysopc 14:0	GP	468.3	467.3	[M+H]+	C22H46NO7P	0.657919	0.0997627	0.920155	1.31035	0.000269976	0.766981	0.881215	0.245234	0.925157
Lysopc 16:0	GP	496.33	495.3	[M+H]+	C24H50NO7P	0.306486	0.467908	0.986742	1.16795	0.00204434	0.933833	0.457889	0.63297	0.993854
Lysopc 16:1	GP	494.31	493.3	[M+H]+	C24H48NO7P	1.347	0.00101693	0.702711	1.47316	1.90653e-05	0.542505	0.503852	0.513448	0.947548
Lysopc 18:0	GP	524.36	523.36	[M+H]+	C26H54NO7P	0.661721	0.063193	1.17467	0.967334	0.0121176	0.804414	0.825215	0.333636	0.931182
Lysopc 18:1	GP	522.35	521.35	[M+H]+	C26H52NO7P	0.618276	0.151533	0.936257	1.01622	0.00912861	0.892585	0.352622	0.773361	0.98944
Lysopc 18:2	GP	520.33	519.35	[M+H]+	C26H50NO7P	0.405296	0.388808	0.969664	1.2417	0.000654157	0.870661	1.03187	0.227609	0.969453
Lysopc 20:1	GP	550.37	549.37	[M+H]+	C28H56NO7P	0.450999	0.188197	1.15883	0.593296	0.175168	0.85364	0.192054	0.861004	0.981919
Lysopc 20:2	GP	548.36	547.37	[M+H]+	C28H54NO7P	1.04246	0.00736034	1.34343	0.247501	0.322776	1.17398	1.04008	0.202302	0.908686
Urocanic Acid	Organic acid And Its derivatives	139.04	138.043	[M+H]+	C6H6N2O2	0.638478	0.0951747	1.36111	0.591512	0.0781985	1.4594	0.865386	0.370041	1.17897
Taurocholic Acid Sodium Salt Hydrate	Bile acids	556.28	555.284	[M+H]+	C26H46NNaO8S	0.442083	0.304457	0.887874	0.713073	0.0993655	0.882968	0.147492	0.749367	0.974165
N6-Succinyl Adenosine	Nucleotide And Its metabolomics	384	383.108	[M+H]+	C14H17N5O8	0.045042	0.891255	0.978013	0.397157	0.283192	0.851879	0.530198	0.755392	1.04623
3-Hydroxyhippuric Acid	Amino acid and Its metabolomics	196.05	195.053	[M+H]+	C9H9NO4	0.484196	0.205199	0.745483	0.768213	0.123821	0.62181	0.905962	0.304818	0.772846
2-(Dimethylamino)Guanosine	Nucleotide And Its metabolomics	312	311.123	[M+H]+	C12H17N5O5	0.0829367	0.832464	0.972932	0.918539	0.0394791	0.722435	0.42241	0.457983	0.911725
N-Acetylthreonine	Amino acid and Its metabolomics	162	161.069	[M+H]+	C6H11NO4	0.841743	0.030617	0.774064	0.635995	0.123241	0.820867	0.0571684	0.886742	0.985597
Pantetheine	CoEnzyme and vitamins	279.13	278.13	[M+H]+	C11H22N2O4S	0.207885	0.492028	0.952842	0.306264	0.424124	0.942907	0.447392	0.573955	0.949893
4-Hydroxyretinoic Acid	CoEnzyme and vitamins	317.3	316.204	[M+H]+	C20H28O3	0.331552	0.336332	0.838227	0.366878	0.296577	0.824494	0.223596	0.496101	0.895091
DL-Pipecolic Acid	Organic acid And Its derivatives	130	129.079	[M+H]+	C6H11NO2	0.438296	0.450667	1.1834	0.57726	0.174924	1.3394	0.244893	0.752494	1.08322
5'-Deoxy-5'-(Methylthio) Adenosine	Nucleotide And Its metabolomics	298	297.09	[M+H]+	C11H15N5O3S	0.755252	0.0550527	0.900324	0.34034	0.487946	0.951891	2.14355	0.00801339	0.852922
Deoxycytidine	Nucleotide And Its metabolomics	228	227.091	[M+H]+	C9H13N3O4	0.126441	0.380099	0.812346	0.516981	0.102375	0.659742	0.0689925	0.910988	0.972399
Sarcosine	Amino acid and Its metabolomics	90	89.048	[M+H]+	C3H7NO2	0.105843	0.78095	1.01959	0.417211	0.311599	0.935884	1.38152	0.10894	0.880314
11-Cis-Retinol	CoEnzyme and vitamins	287.3	286.23	[M+H]+	C20H30O	0.674342	0.101447	0.842803	1.04414	0.00323073	0.727036	1.29698	0.0962782	0.865827
Punicic Acid	FA	279.3	278.225	[M+H]+	C18H30O2	1.23977	0.00100402	0.488275	1.50782	3.56371e-05	0.232912	2.23686	0.0100763	0.605505
2-Aminoadipic Acid	Organic acid And Its derivatives	162.1	161.069	[M+H]+	C6H11NO4	0.848185	0.0412634	0.744112	0.842528	0.0623202	0.711849	1.73675	0.0560375	1.30973
Lysopc 17:0	GP	510.1	509.348	[M+H]+	C25H52NO7P	0.37495	0.347676	1.06038	1.37707	4.79084e-05	0.723999	0.896502	0.308748	0.945078
6-Methyl mercaptopurine	Nucleotide And Its metabolomics	167.1	166.031	[M+H]+	C6H6N4S	0.667228	0.0680405	0.92532	0.986418	0.00808607	0.883819	0.103317	0.779965	0.98857
N-Formylmethionine	Amino acid and Its metabolomics	178	177.046	[M+H]+	C6H11NO3S	0.558475	0.235215	0.883859	0.0166831	0.99353	1.00073	1.71889	0.0244791	0.811694
Sn-Glycero-3-Phosphocholine	Tryptamines,Cholines,Pigments	258.2	257.103	[M+H]+	C8H20NO6P	0.584313	0.0788667	1.34423	0.241781	0.310692	0.854453	0.230894	0.653995	0.930528
Indole	Heterocyclic compounds	118	117.058	[M+H]+	C8H7N	0.959865	0.0219768	1.11971	0.227346	0.609211	1.02342	1.59193	0.0804296	1.09156
Dihydrojasmone	Organic acid And Its derivatives	167.1	166.136	[M+H]+	C11H18O	0.431428	0.293858	0.885482	0.0485404	0.793795	0.9726	0.795174	0.398362	0.901007
5-Aminolevulinate	Organic acid And Its derivatives	132.1	131.058	[M+H]+	C5H9NO3	0.52433	0.14568	0.870724	0.849074	0.0245983	0.802076	1.66593	0.0258101	1.18509
Lysopc 15:0	GP	482.3	481.317	[M+H]+	C23H48NO7P	0.408152	0.368354	0.922492	1.19521	0.00132332	0.727853	0.930942	0.263175	0.917861
Lysope 18:2 (2N Isomer)	GP	520.33	519.332	[M+H]+	C26H50NO7P	0.405296	0.388808	0.969664	1.2417	0.000654157	0.870661	1.03187	0.227609	0.969453
Lysopc 18:3	GP	518.3	517.317	[M+H]+	C26H48NO7P	0.519105	0.253115	0.96697	1.05681	0.00451425	0.899982	1.63789	0.0297912	0.940064
Glucosamine	Carboxylic acids and derivatives	180	179.079	[M+H]+	C6H13NO5	0.00246517	0.857527	1.01853	0.903182	0.0329067	0.827377	1.84599	0.0359415	0.831981
2-Hydroxycinnamic acid	Benzene and substituted derivatives	165.047	164.047	[M+H]+	C9H8O3	0.241546	0.395093	0.892178	0.622846	0.117423	0.808017	0.496315	0.391466	0.895357
Acetyl-L-carnitine	FA	204.122	203.116	[M+H]+	C9H17NO4	0.307045	0.559957	1.0401	0.12197	0.730704	0.976988	0.694195	0.487233	1.05593
Jasmonic acid	Organic acid And Its derivatives	211.133	210.126	[M+H]+	C12H18O3	0.838575	0.0476293	0.728563	0.0928721	0.787182	1.0559	1.44798	0.0737559	1.28995
Thiamine	CoEnzyme and vitamins	265.111	265.112	[M]+	C12H17N4OS+	0.219846	0.577914	1.06928	0.839459	0.0363434	1.39545	1.3155	0.0990646	0.80705
DL-Stachydrine	Organic acid And Its derivatives	144.102	179.071	[M-Cl]+	C7H14ClNO2	0.564583	0.509228	0.877591	0.455013	0.743239	0.92755	0.122849	0.944484	1.00763
L-Norleucine	Amino acid and Its metabolomics	132.102	131.095	[M+H]+	C6H13NO2	1.02474	0.0147189	1.2208	0.35744	0.475093	1.0545	1.7157	0.0623764	1.17892
N-Acetyl-L-alanine	Amino acid and Its metabolomics	132.058	131.058	[M+H]+	C5H9NO3	0.457814	0.210709	0.891629	0.837281	0.0284342	0.812998	1.75494	0.0168534	1.19178
6-Dimethylaminopurine	Nucleotide And Its metabolomics	164.086	163.086	[M+H]+	C7H9N5	0.470267	0.379032	1.15889	1.02195	0.0104285	1.75921	0.690818	0.302255	1.26528
5-Aminosalicylic Acid	Organic acid And Its derivatives	154.043	153.043	[M+H]+	C7H7NO3	0.575295	0.139124	0.727449	0.573155	0.135719	0.729196	0.465884	0.394871	0.85874
15-deoxy-δ-12,14-PGJ2	FA	317.204	316.204	[M+H]+	C20H28O3	0.0729497	0.811326	0.969308	0.436698	0.402318	0.869368	1.46845	0.0887883	0.761741
PAF C-16	GP	524.36	523.364	[M+H]+	C26H54NO7P	0.661721	0.063193	1.17467	0.967334	0.0121176	0.804414	0.825215	0.333636	0.931182
2-Pyrrolidinone	Heterocyclic compounds	86.0528	85.0528	[M+H]+	C4H7NO	0.509682	0.159707	0.873257	0.847492	0.0304136	0.802362	1.31708	0.103718	1.13567
Isobutyryl carnitine	FA	232.147	231.147	[M+H]+	C11H21NO4	0.558018	0.242716	1.18595	0.353435	0.396124	1.13949	0.347866	0.979759	1.00312
Stearidonic Acid	FA	277.209	276.209	[M+H]+	C18H28O2	1.51687	1.12813e-05	0.431829	1.46586	9.01731e-07	0.304814	1.56963	0.089707	0.787837
N-Alpha-acetyllysine	Amino acid and Its metabolomics	189.116	188.116	[M+H]+	C8H16N2O3	0.166234	0.477815	0.934417	0.121392	0.621118	0.95432	1.122	0.148685	0.857165
2'-Hydroxy-5'-methylacetophenone	Benzene and substituted derivatives	151.068	150.068	[M+H]+	C9H10O2	0.523809	0.127482	1.21919	0.884656	0.0370489	0.765467	1.07154	0.24026	0.892135
N-Acetyl-L-Histidine	Amino acid and Its metabolomics	198.08	197.08	[M+H]+	C8H11N3O3	0.264881	0.408917	0.919372	0.697305	0.111579	0.818396	0.521851	0.668181	1.0445
2-Methylbutyroylcarnitine	FA	246.163	245.163	[M+H]+	C12H23NO4	0.361664	0.263085	0.870636	0.486035	0.295671	0.856486	0.0528124	0.613468	0.947778
Isonicotinic acid	Organic acid And Its derivatives	124.032	123.032	[M+H]+	C6H5NO2	0.789684	0.0634826	1.16679	0.816174	0.0426513	1.19022	0.0196148	0.946616	0.995067
Methyl jasmonate	Aldehyde,Ketones,Esters	225.141	224.141	[M+H]+	C13H20O3	0.514806	0.196903	1.02975	0.538321	0.191893	1.03435	1.22392	0.142442	1.03972
Dimethyl fumarate	Aldehyde,Ketones,Esters	145.042	144.042	[M+H]+	C6H8O4	0.921775	0.0136888	0.891409	1.53087	8.49684e-08	0.658971	1.78759	0.0240303	0.875811
LysoPE(16:1(9Z)/0:0)	GP	452.27	451.27	[M+H]+	C21H42NO7P	1.53045	1.55208e-06	0.581282	1.5096	1.86604e-07	0.492345	0.750862	0.412294	0.925123
Ethyl dodecanoate	Alcohol and amines	229.1	228.209	[M+H]+	C14H28O2	0.404786	0.279279	1.05298	0.689018	0.163311	1.31282	0.0760943	0.711389	1.03038
Butyl 3-methylbutanoate	Aldehyde,Ketones,Esters	159.4	158.131	[M+H]+	C9H18O2	0.561668	0.323879	1.12548	0.0218495	0.804622	0.968631	0.478044	0.678924	1.05076
Butylamine	Alcohol and amines	74.1	73.0891	[M+H]+	C4H11N	0.176344	0.712616	1.06885	0.573405	0.230692	1.23406	0.558511	0.722949	1.05661
Hydroxyacetone	Aldehyde,Ketones,Esters	75.1	74.0368	[M+H]+	C3H6O2	0.217358	0.848814	1.05062	0.114004	0.624342	0.874142	0.211792	0.563787	0.859349
Methylcysteine	Amino acid and Its metabolomics	136.2	135.035	[M+H]+	C4H9NO2S	0.165262	0.634134	0.935193	0.276899	0.409904	0.900962	0.148016	0.593181	0.937968
2-Acetyl-5-methylfuran	Heterocyclic compounds	125.1	124.052	[M+H]+	C7H8O2	0.430866	0.364922	1.02118	0.166248	0.676273	1.01005	0.575909	0.376179	0.977289
Triethylamine	Others	102	101.12	[M+H]+	C6H15N	0.339597	0.376791	0.885363	0.52131	0.157498	0.826996	1.22519	0.14769	0.815318
Methyl dihydrojasmonate	Aldehyde,Ketones,Esters	227.3	226.312	[M+H]+	C13H22O3	0.952177	0.0185869	1.13265	0.839425	0.0758449	1.31223	0.0718457	0.914359	1.00754
4-Ethyl-2-methoxyphenol	Benzene and substituted derivatives	153.3	152.084	[M+H]+	C9H12O2	0.342707	0.570531	1.05216	0.478151	0.274285	0.880971	1.00944	0.337359	0.885591
Barbituric acid	Heterocyclic compounds	129	128.022	[M+H]+	C4H4N2O3	0.52105	0.146569	1.14672	0.627791	0.137709	0.88908	0.0809453	0.942508	1.00448
Hexyl Acetate	Aldehyde,Ketones,Esters	167.1	144.115	[M+Na]+	C8H16O2	0.629442	0.157837	1.17574	0.311798	0.572528	1.06904	0.949065	0.393793	1.10893
Creosol	Benzene and substituted derivatives	139.2	138.068	[M+H]+	C8H10O2	0.842447	0.12523	0.465793	0.816213	0.053268	0.310877	0.138052	0.490872	0.771098
DL-Leucine	Amino acid and Its metabolomics	132.095	131.095	[M+H]+	C6H13NO2	0.567469	0.116969	0.870914	0.881536	0.0195023	0.805107	1.81062	0.0153543	1.19457
3-(Methylthio)-1-propanol	Alcohol and amines	107.045	106.045	[M+H]+	C4H10OS	1.05995	0.00782153	0.712647	1.29136	0.00128957	0.631349	0.768605	0.23308	0.889553
2-Pentyl-3-phenyl-2-propenal	Aldehyde,Ketones,Esters	203.4	202.136	[M+H]+	C14H18O	0.575143	0.17595	0.956959	0.626067	0.109684	1.07153	0.426283	0.661996	0.98632
PYRROLIDINE	Heterocyclic compounds	72.3	71.0735	[M+H]+	C4H9N	0.26203	0.417712	0.940182	0.827191	0.0326276	0.81006	1.41142	0.0856095	1.20398
1-Naphthylamine	Benzene and substituted derivatives	144.1	143.073	[M+H]+	C10H9N	0.648452	0.24839	1.26605	0.0493677	0.997997	0.999262	1.17775	0.14553	1.33247
6-Methylnicotinamide	Heterocyclic compounds	137.1	136.064	[M+H]+	C7H8N2O	0.733047	0.0169548	1.89032	0.353525	0.0624401	0.439274	0.110312	0.677808	0.862568
2-Methyl-1-propanol	Alcohol and amines	75.3	74.0732	[M+H]+	C4H10O	0.0725523	0.619143	1.16573	0.691314	0.159175	1.53291	0.0414213	0.805684	1.03869
1-Aminopropan-2-ol	Alcohol and amines	76	75.0684	[M+H]+	C3H9NO	0.999616	0.00657926	0.633606	0.475268	0.490168	0.860501	0.604004	0.422914	0.90262
Furfuryl alcohol	Alcohol and amines	99	98.0368	[M+H]+	C5H6O2	0.116587	0.928632	1.01173	0.0299239	0.888332	0.984123	0.126672	0.96863	0.995462
Nα-Acetyl-L-glutamine	Amino acid and Its metabolomics	189.1	188.183	[M+H]+	C7H12N2O4	0.607856	0.177996	0.808556	0.527482	0.271379	0.828584	1.3436	0.132156	1.39494
Glycyl-DL-phenylalanine	Amino acid and Its metabolomics	223.2	222.1	[M+H]+	C11H14N2O3	0.876022	0.125063	0.315116	1.35704	0.0614798	0.138254	1.01742	0.225976	0.461853
N-Methylalanine	Amino acid and Its metabolomics	104	103.063	[M+H]+	C4H9NO2	0.474869	0.245688	0.934047	1.3664	3.90374e-05	0.699921	0.747339	0.39685	0.946263
Phosphocholine	Nucleotide And Its metabolomics	185.1	184.074	[M+H]+	C5H15NO4P	0.415417	0.34924	0.94277	1.48804	3.88701e-06	0.691262	0.977913	0.269824	0.944254
2,4-Dihydroxypteridine	Heterocyclic compounds	165.3	164.033	[M+H]+	C6H4N4O2	0.42134	0.196087	0.830657	0.191117	0.496737	0.908898	0.135254	0.693528	0.950285
Mesoxalate	Organic acid And Its derivatives	119	117.99	[M+H]+	C3H2O5	0.512375	0.109779	0.505663	1.00831	0.19989	0.471325	0.946053	0.343291	1.38992
N-Amidino-L-Aspartate	Amino acid and Its metabolomics	176.4	175.059	[M+H]+	C5H9N3O4	0.166568	0.767263	1.0356	0.45727	0.308883	1.13716	1.15858	0.148879	0.844241
2'-Deoxycytidine 5'-Diphosphate	Nucleotide And Its metabolomics	388.2	387.023	[M+H]+	C9H15N3O10P2	0.841426	0.0320648	0.908304	0.713863	0.0577266	0.925664	2.25587	0.00367373	0.884705
7,8-Dimethylalloxazine	Heterocyclic compounds	243.2	242.08	[M+H]+	C12H10N4O2	0.167653	0.717724	0.96971	0.427517	0.277811	0.911769	0.934139	0.279576	0.907185
L-Tryptophanamide	Amino acid and Its metabolomics	204.3	203.106	[M+H]+	C11H13N3O	0.830934	0.0557642	1.16391	0.487264	0.26654	1.08197	1.38454	0.163174	1.10808
Dethiobiotin	CoEnzyme and vitamins	215.3	214.132	[M+H]+	C10H18N2O3	0.249381	0.627035	1.02661	0.312381	0.448733	0.958147	0.909455	0.218602	0.930027
Pyridoxal	Heterocyclic compounds	168.3	167.058	[M+H]+	C8H9NO3	0.68184	0.0868924	0.718882	0.333653	0.535253	1.07887	1.25654	0.0378215	0.710957
Delta-Hexalactone	Aldehyde,Ketones,Esters	115.075	114.068	[M+H]+	C6H10O2	0.640318	0.0968901	0.845325	0.94535	0.0177572	0.714331	0.865158	0.352864	0.895577
Acetylcholine	Alcohol and amines	146.108	145.11	[M+H]+	C7H15NO2	0.317383	0.415497	1.17006	0.857161	0.0362597	1.5977	1.09291	0.375894	1.14766
Hydroxyphenylethylamine	Benzene and substituted derivatives	120.082	137	[M+H]+	C8H11NO	0.409348	0.242755	0.943095	0.958388	0.0138669	0.88322	1.59104	0.0295775	0.898772
β-Alanine	Amino acid and Its metabolomics	90.048	89.048	[M+H]+	C3H7NO2	0.161807	0.9051	0.981712	0.208334	0.775148	1.0462	0.0363238	0.695782	0.942446
4-Hydroxyhippurate	Amino acid and Its metabolomics	196.05	195.053	[M+H]+	C9H9NO4	0.484196	0.205199	0.745483	0.768213	0.123821	0.62181	0.905962	0.304818	0.772846
L-Valyl-L-phenylalanine	Amino acid and Its metabolomics	265.145	264.147	[M+H]+	C14H20N2O3	0.114423	0.589892	1.52355	0.913397	0.0415121	0.114447	0.992997	0.198607	0.42414
3-Hydroxy-2-methyl-4H-pyran-4-one	Heterocyclic compounds	127.031	126.032	[M+H]+	C6H6O3	0.12791	0.0390769	0.662922	0.0445905	0.00721112	0.542341	0.786015	0.26611	1.15677
2-Methylpyrazine	Heterocyclic compounds	141.1	94.0531	[M+H]+	C5H6N2	0.429146	0.189129	0.776317	0.0365403	0.714197	0.944129	0.0105373	0.764314	0.950444
Phenethyl alcohol	Benzene and substituted derivatives	105.1	122.073	[M-H2O+H]+	C8H10O	0.0643399	0.656045	0.978328	0.439988	0.260148	0.941507	0.573102	0.71322	1.01941
Salicylaldehyde	Benzene and substituted derivatives	105.034	122.037	[M-H2O+H]+	C7H6O2	0.526749	0.280536	1.31275	0.137826	0.6235	1.19384	0.356699	0.913477	1.02855
Benzaldehyde	Benzene and substituted derivatives	107.048	106.042	[M+H]+	C7H6O	0.198946	0.46139	0.973221	0.75607	0.0560931	0.914954	0.741441	0.516233	1.02546
N-(2-hydroxyethyl)stearamide	Alcohol and amines	328.319	327.314	[M+H]+	C20H41NO2	0.888	0.0235208	0.839272	0.507105	0.196059	0.921108	0.302814	0.5679	0.967176
Biliverdin	Tryptamines,Cholines,Pigments	583.2	582.248	[M+H]+	C33H34N4O6	0.0454922	0.962159	0.98929	0.344872	0.31605	0.808793	0.660642	0.84107	1.03824
Sphingosine	SL	300.289	299.282	[M+H]+	C18H37NO2	1.13228	0.00304201	1.4569	0.975567	0.00978201	1.29153	0.285214	0.785448	1.02495
N, N-diacetyl-O-methylhydroxylamine	Alcohol and amines	132.058	131.058	[M+H]+	C5H9NO3	0.457814	0.210709	0.891629	0.837281	0.0284342	0.812998	1.75494	0.0168534	1.19178
Iminodiacetic acid	Organic acid And Its derivatives	134.1	133.037	[M+H]+	C4H7NO4	0.0423769	0.936996	0.995397	0.635663	0.0936399	0.887996	0.966973	0.259169	0.933144
Hydroxyquinoline	Heterocyclic compounds	146.051	145.053	[M+H]+	C9H7NO	1.10978	0.00486572	1.19528	0.491124	0.243555	1.07303	1.8276	0.0377545	1.14672
DL-O-tyrosine	Amino acid and Its metabolomics	166.085	165.079	[M+H]+	C9H11NO2	0.243335	0.428884	0.975881	0.872801	0.0241952	0.927519	0.389662	0.809677	1.00695
Thioacetic acid-S-methyl ester	Aldehyde,Ketones,Esters	91.1	90.0139	[M+H]+	C3H6OS	0.0806607	0.808716	0.961857	0.0621313	0.842384	0.970286	0.00103329	0.646693	0.933814
Indole-5-carboxylic acid	Heterocyclic compounds	162.045	161.048	[M+H]+	C9H7NO2	0.11997	0.870554	1.01765	0.884703	0.0195098	0.752628	0.869867	0.303507	1.11344
Palmitoyl N-isopropylamide	Alcohol and amines	320.298	297.303	[M+Na]+	C19H39NO	0.513449	0.231893	1.20235	0.411883	0.298107	1.19101	1.18025	0.121965	1.09024
1,2-dioctanoyl PC	GP	510.3	509.312	[M+H]+	C24H48NO8P	0.0587673	0.651864	1.03223	0.756744	0.0879884	0.874052	0.653638	0.313931	1.06287
7-methylguanosine	Nucleotide And Its metabolomics	298.1	297.107	[M+H]+	C11H15N5O5	0.508606	0.167799	0.864724	0.727117	0.0779398	0.807884	0.293383	0.694923	0.961841
6-O-methylguanine	Nucleotide And Its metabolomics	166.063	165.065	[M+H]+	C6H7N5O	0.853771	0.0263963	0.764732	1.03072	0.0112298	0.731391	1.0134	0.154706	0.862457
Kojibiose	Others	325.111	342.116	[M-H2O+H]+	C12H22O11	0.977459	0.0179775	2.30638	1.46285	0.000155869	5.0941	0.833747	0.356942	1.3413
2'-O-methyladenosine	Nucleotide And Its metabolomics	348.1	281.112	[M+H]+	C11H15N5O4	0.762375	0.00838541	3.71343	1.51539	0.00129461	649.176	1.84697	0.146642	7.05654
Oxypurinol	Nucleotide And Its metabolomics	153	152.033	[M+H]+	C5H4N4O2	0.485627	0.0397654	1.68218	0.124329	0.0360743	0.421704	0.0666378	0.430946	0.780452
Dodecylcarnitine	FA	344.271	343.272	[M+H]+	C19H37NO4	1.09032	0.00299582	0.696472	0.896438	0.0195945	0.697	0.86804	0.234397	0.888064
Allopurinol	Nucleotide And Its metabolomics	137.048	136.038	[M+H]+	C5H4N4O	0.510278	0.0349029	1.84226	0.176418	0.0498564	0.428339	0.00470984	0.786231	0.913846
1,2-dodecanoyl PC	GP	548.4	548.353	[M-H2O+H]+	C28H56NO8P	1.28907	0.00117951	1.61046	0.590088	0.128231	1.37877	1.19252	0.140111	0.888951
Decanoyl L-Carnitine	FA	316.238	315.241	[M+H]+	C17H33NO4	0.650256	0.0829995	0.82816	0.592163	0.194819	0.83823	0.293915	0.590668	0.946769
(±)15-HETE [(±)15-hydroxy-5Z,8Z,11Z,13E-eicosatetraenoic acid]	Oxidized lipids	303.232	320.235	[M-H2O+H]+	C20H32O3	0.852226	0.0205561	0.789209	1.47515	2.77081e-07	0.265393	1.78783	0.030705	0.785594
(R)-(-)-2-phenylglycine	Amino acid and Its metabolomics	120.073	137.084	[M-H2O+H]+	C8H11NO	0.202063	0.450718	0.971784	0.790452	0.0462684	0.914433	0.386025	0.822219	1.00922
1-acetylindole	Heterocyclic compounds	160.1	159.068	[M+H]+	C10H9NO	1.04573	0.00734681	1.19852	0.250149	0.593517	1.0357	1.51667	0.0803456	1.1254
3-Carboxypropyltrimethylammonium	Organic acid And Its derivatives	146.108	145.11	[M+H]+	C7H15NO2	0.317383	0.415497	1.17006	0.857161	0.0362597	1.5977	1.09291	0.375894	1.14766
Mavidin	Others	331.08	330.074	[M+H]+	C17H14O7	1.00521	0.0148751	0.322552	0.938262	0.027311	0.361949	0.578893	0.951154	1.0162
L-Isoleucine	Amino acid and Its metabolomics	132.092	131.095	[M+H]+	C6H13NO2	0.518211	0.128756	0.870726	0.92128	0.0125477	0.779257	1.67224	0.0248419	1.18531
2 ', 6'-Dihydroxy-4'-methoxyacetophenone	Benzene and substituted derivatives	183.056	182.058	[M+H]+	C9H10O4	0.800521	0.049954	1.75893	0.0685132	0.981758	0.993784	0.575514	0.779917	1.06732
PE (18: 1 (9Z) / 0: 0)	GP	480.3	479.301	[M+H]+	C23H46NO7P	1.46032	2.18097e-05	0.628487	1.50082	3.76243e-06	0.569695	1.22462	0.143854	0.897118
1-Methylguanine	Nucleotide And Its metabolomics	166.071	165.065	[M+H]+	C6H7N5O	0.92799	0.0113634	0.797769	1.01608	0.0071015	0.76722	1.78946	0.0236894	0.827084
9-octadecenal	Aldehyde,Ketones,Esters	313.3	266.261	[M+H]+	C18H34O	1.1841	0.00109649	0.832274	0.597565	0.120546	0.925364	0.928577	0.242607	0.936762
(±) -Myristylcarnitine	FA	372.312	371.304	[M+H]+	C21H41NO4	1.23526	0.0010002	0.601945	0.885534	0.0315059	0.680443	0.624438	0.353149	0.904503
N-Acetylcadaverine	Alcohol and amines	145.1	144.126	[M+H]+	C7H16N2O	0.439321	0.371932	0.88794	0.990608	0.0194151	0.717382	0.635881	0.532657	0.921257
Biotinamide	Alcohol and amines	244.108	243.104	[M+H]+	C10H17N3O2S	0.0342325	0.677733	1.07812	0.234498	0.596853	0.937327	0.559406	0.436949	0.912118
Hypotaurocyamine	Alcohol and amines	152	151.042	[M+H]+	C3H9N3O2S	0.350102	0.753279	1.10594	0.362451	0.599745	0.852724	0.85807	0.183068	1.51927
8,8a-deoxy oleane	Others	373.3	372.251	[M+H]+	C20H36O6	0.324652	0.630168	1.6614	0.376506	0.346511	0.31826	0.675365	0.290739	0.227801
5'-deoxy-5'-fluoroadenosine	Nucleotide And Its metabolomics	270.1	269.092	[M+H]+	C10H12FN5O3	0.52483	0.167853	249.467	1.72327	7.77783e-05	32007.3	2.04992	0.0804791	816.886
(1R, 6S) -6-amino-5-oxocyclohexyl-2-ene-1-carboxylic acid ester	Aldehyde,Ketones,Esters	156.1	155.058	[M+H]+	C7H9NO3	0.102196	0.934633	0.992305	0.223366	0.456139	0.931055	0.468952	0.632265	1.05581
N-acetylpyrrolidine	Heterocyclic compounds	114.066	113.084	[M+H]+	C6H11NO	0.825955	0.0318783	0.754367	0.848971	0.0249696	0.749249	0.489015	0.518766	0.922505
1,3-Dicyclohexylurea	Alcohol and amines	225.196	224.189	[M+H]+	C13H24N2O	0.0547449	0.772671	1.00965	0.614512	0.123967	1.03671	0.591659	0.376111	1.02395
2-O-methyl PAF C-16	GP	496.3	495.369	[M+H]+	C25H54NO6P	0.661411	0.150531	1.04329	1.41549	3.02352e-05	1.15016	0.511454	0.694052	1.01002
Heterodendrin	Others	262.128	261.121	[M+H]+	C11H19NO6	0.107944	0.950093	1.00665	0.154039	0.752965	1.03184	0.0747824	0.95476	0.994112
Di-n-propyl phthalate	Aldehyde,Ketones,Esters	251.128	250.12	[M+H]+	C14H18O4	1.27271	0.000962714	0.698948	0.752951	0.0636233	0.819296	0.254663	0.918036	1.00699
Coniferol	Alcohol and amines	181.085	180.079	[M+H]+	C10H12O3	0.899689	0.0355646	0.770653	0.515165	0.445549	0.843076	0.915326	0.303645	0.878732
5-Hydroxy-2-oxo-4-ureido-2,5-dihydro-1H-imidazole-5-carboxylic acid ester	Organic acid And Its derivatives	203	202.034	[M+H]+	C5H6N4O5	0.518365	0.269773	0.913735	1.38325	3.47463e-05	0.721078	0.462614	0.549839	1.03705
4-tert-butylbenzoic acid	Benzene and substituted derivatives	179.106	178.099	[M+H]+	C11H14O2	0.386157	0.381163	0.942788	0.589849	0.13868	0.911967	1.63762	0.0580381	0.883635
2,4-diacetamino-2,4,6-triphenoxy-D-mannopyranose	Carboxylic acids and derivatives	247.1	246.122	[M+H]+	C10H18N2O5	0.446803	0.395325	0.341315	0.728879	0.374206	0.320351	1.29866	0.25739	0.116552
1-deoxyvaleric acid	Organic acid And Its derivatives	235.2	234.162	[M+H]+	C15H22O2	0.176538	0.641698	1.01832	1.01518	0.00709324	1.09384	0.017469	0.960753	0.99829
2-Mercaptobenzothiazole	Heterocyclic compounds	167.994	166.986	[M+H]+	C7H5NS2	0.275187	0.647923	1.03045	0.532323	0.224526	1.08846	0.283652	0.961818	1.0029
Urobilin	Tryptamines,Cholines,Pigments	591.3	590.31	[M+H]+	C33H42N4O6	0.141848	0.569222	0.541389	0.50792	0.314301	0.227756	0.323298	0.442971	0.417197
2-Ethylhexyl phthalate	Aldehyde,Ketones,Esters	279.2	278.152	[M+H]+	C16H22O4	0.0154175	0.994897	1.00049	0.0777358	0.917067	0.992305	0.0790757	0.781969	1.02007
20,26-dihydroxyecdysone	Hormones and hormone related compunds	497.3	496.304	[M+H]+	C27H44O8	0.382857	0.396876	0.967203	1.40611	1.1251e-05	0.798607	0.817049	0.336527	0.972726
(4Z, 7Z, 10Z, 13Z, 16Z, 19Z) -Eicosahexaenoate	Aldehyde,Ketones,Esters	357.3	356.272	[M+H]+	C24H36O2	0.322737	0.718579	1.24226	0.769152	0.428272	1.35063	1.09634	0.157553	0.379
Hexanoylcarnitine	FA	260.186	259.178	[M+H]+	C13H25NO4	0.306855	0.430843	0.921952	0.647038	0.122536	0.837072	0.43974	0.423503	0.932154
Cytarabine	Nucleotide And Its metabolomics	244.083	243.086	[M+H]+	C9H13N3O5	0.214431	0.690046	1.05532	1.06745	0.0113099	0.658707	0.705987	0.388467	0.893039
Piperidone	Heterocyclic compounds	170.1	169.11	[M+H]+	C9H15NO2	0.934207	0.0865617	1.614	0.913955	0.162058	2.3909	0.22021	0.780614	0.963321
Monoisobutyl phthalate	Aldehyde,Ketones,Esters	223.095	222.089	[M+H]+	C12H14O4	0.110421	0.775446	1.00739	0.597554	0.150144	1.04202	1.28862	0.121529	1.03703
MAG(16:1)isomer	GL	331.274	330.304	[M+H]+	C19H38O4	1.02378	0.00930889	0.812414	0.774921	0.0385582	0.859897	1.47835	0.0757519	0.876383
MAG(16:1)	GL	331.274	330.304	[M+H]+	C19H38O4	1.02378	0.00930889	0.812414	0.774921	0.0385582	0.859897	1.47835	0.0757519	0.876383
LysoPC 22:4 (2n isomer1)	GP	572.363	572.363	[M+H]+	C30H55NO7P	1.13742	0.00827095	1.32925	0.40437	0.235259	1.12515	0.455288	0.697578	0.971685
LysoPC 22:4	GP	572.363	572.363	[M+H]+	C30H55NO7P	1.13742	0.00827095	1.32925	0.40437	0.235259	1.12515	0.455288	0.697578	0.971685
LysoPC 22:5 (2n isomer3)	GP	570.346	570.357	[M+H]+	C30H53NO7P	0.00229383	0.802842	1.01824	0.991351	0.0107341	0.828068	0.932774	0.259027	0.942037
LysoPC 22:5 (2n isomer2)	GP	570.346	570.357	[M+H]+	C30H53NO7P	0.00229383	0.802842	1.01824	0.991351	0.0107341	0.828068	0.932774	0.259027	0.942037
LysoPC 22:5 (2n isomer1)	GP	570.347	570.357	[M+H]+	C30H53NO7P	0.0247876	0.817988	1.01609	1.05794	0.00529559	0.826428	1.40712	0.0916951	0.921486
LysoPC 22:6	GP	568.33	568.33	[M+H]+	C30H51NO7P	0.752299	0.0655059	1.0811	0.713821	0.0623343	0.921555	0.966421	0.192014	1.06506
LysoPC 20:1(2n isomer)	GP	550.37	550.387	[M+H]+	C28H57NO7P	0.773927	0.0416195	1.2415	0.15158	0.906	0.985445	1.44039	0.0794955	0.856435
LysoPC 20:2(2n isomer2)	GP	548.362	548.371	[M+H]+	C28H55NO7P	1.06194	0.00713122	1.34408	0.396682	0.220328	1.2018	1.06695	0.274468	0.928776
LysoPC 20:2(2n isomer1)	GP	548.362	548.371	[M+H]+	C28H55NO7P	1.06194	0.00713122	1.34408	0.396682	0.220328	1.2018	1.06695	0.274468	0.928776
LysoPC 20:3(2n isomer)	GP	546.347	546.355	[M+H]+	C28H53NO7P	1.35144	0.000886411	1.61787	0.447772	0.187532	1.4095	1.37432	0.0712951	0.895993
LysoPC 20:3	GP	546.347	546.355	[M+H]+	C28H53NO7P	1.35144	0.000886411	1.61787	0.447772	0.187532	1.4095	1.37432	0.0712951	0.895993
LysoPC 20:4(2n isomer)	GP	544.331	544.331	[M+H]+	C28H51NO7P	1.18764	0.00285312	1.111	0.654146	0.110654	0.938724	0.504382	0.51919	0.976298
LysoPC 20:4	GP	544.331	544.331	[M+H]+	C28H51NO7P	1.18764	0.00285312	1.111	0.654146	0.110654	0.938724	0.504382	0.51919	0.976298
LysoPC 20:5	GP	542.316	542.316	[M+H]+	C28H49NO7P	0.708804	0.0655901	1.2362	0.335186	0.303882	1.11754	0.918538	0.21072	0.917149
LysoPC 20:5(2n isomer)	GP	542.316	542.316	[M+H]+	C28H49NO7P	0.696933	0.0671233	1.24529	0.443585	0.192455	1.14962	0.540062	0.376308	0.945145
LysoPC 18:0(2n isomer)	GP	524.363	524.371	[M+H]+	C26H55NO7P	0.994359	0.00979878	1.21698	0.706109	0.0779357	0.892334	0.237158	0.905841	0.993509
LysoPC 18:1(2n isomer)	GP	522.347	522.355	[M+H]+	C26H53NO7P	0.881091	0.0390587	0.912298	0.837468	0.0432505	0.892968	1.26621	0.127438	0.944892
LysoPC 18:2(2n isomer1)	GP	520.33	520.34	[M+H]+	C26H51NO7P	0.663344	0.119638	1.0282	0.113315	0.774014	0.995401	0.511542	0.580292	0.990208
LysoPC 18:3(2n isomer3)	GP	519.332	518.324	[M+H]+	C26H49NO7P	0.481033	0.253939	0.905257	1.35676	5.83903e-06	0.509027	0.905045	0.248063	0.916459
LysoPC 18:3(2n isomer2)	GP	518.316	518.324	[M+H]+	C26H49NO7P	0.310767	0.469103	0.940296	1.28428	3.15785e-05	0.533955	0.67281	0.390131	0.940707
LysoPC 16:0(2n isomer)	GP	496.331	496.34	[M+H]+	C24H51NO7P	0.729275	0.103715	1.0615	1.41166	5.51002e-05	1.1768	0.808075	0.426159	1.02791
LysoPC 16:1(2n isomer)	GP	494.315	494.324	[M+H]+	C24H49NO7P	1.26678	0.00149915	0.741156	1.48872	7.74873e-06	0.553586	1.43424	0.0929618	0.845518
Methyl-tyrosine	Amino acid and Its metabolomics	196.095	195.089	[M+H]+	C10H13NO3	0.665032	0.158984	1.16824	0.210039	0.669227	0.946373	0.24822	0.952727	1.007
Carnitine C22:2	FA	480.405	480.405	[M+H]+	C29H53NO4	1.3871	0.0002638	0.639148	1.29129	0.000129292	0.595355	0.728129	0.345804	0.920385
Carnitine C20:1-OH	FA	470.384	470.384	[M+H]+	C27H51NO5	1.35206	0.000417715	0.514996	1.06982	0.00348999	0.581069	1.39388	0.136725	1.20427
Carnitine C20:1	FA	454.389	454.389	[M+H]+	C27H51NO4	1.5969	3.36901e-06	0.638419	1.42575	9.16829e-06	0.645814	0.507498	0.649405	0.970176
Carnitine ph-C14	FA	448.342	448.342	[M+H]+	C27H45NO4	0.0668953	0.806813	0.967586	0.433984	0.357046	0.857936	0.0255967	0.672098	0.947497
Carnitine C20:5	FA	446.311	446.311	[M+H]+	C27H43NO4	0.454657	0.213855	0.843174	0.652405	0.125431	0.788729	0.259815	0.523737	0.924246
Carnitine C17:1:DC	FA	442.4	442.353	[M+H]+	C24H43NO6	1.41631	1.57161e-05	0.490918	0.977166	0.014968	0.618763	0.700849	0.422496	1.08627
Carnitine C18:3-OH	FA	438.3	438.321	[M+H]+	C25H43NO5	1.21925	0.000904679	0.583883	0.896935	0.0363586	0.678167	0.693852	0.664941	1.04183
Carnitine C18:3	FA	422.327	422.327	[M+H]+	C25H43NO4	0.824922	0.0527181	0.729712	0.865455	0.0398347	0.684049	0.250259	0.600771	0.94385
Carnitine C15:DC	FA	416.339	416.339	[M+H]+	C22H41NO6	1.30793	0.00014058	0.551923	1.02119	0.00471728	0.581475	0.682082	0.501898	1.07093
Carnitine C17:0	FA	414.358	414.358	[M+H]+	C24H47NO4	1.10227	0.00209692	0.675642	0.982502	0.0217122	0.678245	0.82416	0.33245	1.09877
Carnitine C16:3	FA	394.295	394.295	[M+H]+	C23H39NO4	1.03022	0.00719832	0.697648	0.899077	0.0361452	0.684551	0.153675	0.642178	0.959337
Carnitine C15:1	FA	384.311	384.311	[M+H]+	C22H41NO4	1.01512	0.00850812	0.687634	0.707136	0.121512	0.763665	0.147218	0.682024	0.953989
Carnitine C14:2-OH	FA	384.274	384.274	[M+H]+	C21H37NO5	0.997539	0.00933236	0.732398	0.68896	0.116193	0.759575	0.374905	0.571196	0.946143
Carnitine C14:3	FA	366.264	366.264	[M+H]+	C21H35NO4	1.05004	0.00410253	0.623074	0.896152	0.0149104	0.672926	0.635214	0.334548	0.893422
Carnitine C11:DC	FA	360.3	360.276	[M+H]+	C18H33NO6	0.950984	0.00898964	0.765782	0.898836	0.0188455	0.691233	0.327354	0.727116	1.03448
Carnitine C13:1	FA	356.279	356.279	[M+H]+	C20H37NO4	0.831922	0.0451731	0.750593	0.415755	0.430214	0.877498	0.40837	0.464334	0.912795
Carnitine C11:0	FA	330.264	330.264	[M+H]+	C18H35NO4	0.927809	0.0164503	0.730194	0.70609	0.142159	0.783139	0.0652312	0.940336	0.991931
Carnitine C11:1	FA	328.248	328.248	[M+H]+	C18H33NO4	1.10564	0.0309422	1.51153	1.12579	0.033416	2.05797	0.33889	0.390313	0.831491
Carnitine C8-OH	FA	304.2	304.2	[M+H]+	C15H29NO5	0.116289	0.968717	0.996638	0.994451	0.00903481	0.728533	0.479738	0.672482	1.04071
Carnitine C9:0	FA	302.2	302.233	[M+H]+	C16H31NO4	0.36764	0.320155	0.904972	0.642175	0.123682	0.825138	0.207977	0.574188	0.953636
Carnitine C5:DC	FA	276.181	276.181	[M+H]+	C12H21NO6	1.42305	0.000416306	0.459294	0.891994	0.0463082	0.654261	0.23334	0.900747	0.98035
Carnitine ph-C1	FA	266.139	266.139	[M+H]+	C14H19NO4	1.05845	0.0189244	2.0458	0.783119	0.0745266	2.22925	0.811675	0.244367	0.719045
Carnitine C4:DC	FA	262.128	262.128	[M+H]+	C11H19NO6	0.284189	0.597709	1.06029	0.213877	0.682303	1.04168	0.336523	0.527264	0.931485
Carnitine C6:0 Isomer 2	FA	260.186	260.186	[M+H]+	C13H25NO4	0.306855	0.430843	0.921952	0.647038	0.122536	0.837072	0.43974	0.423503	0.932154
Carnitine C6:0 Isomer 1	FA	260.186	260.186	[M+H]+	C13H25NO4	0.089441	0.979073	1.00225	0.359237	0.543739	0.92845	0.22402	0.937347	1.00731
Carnitine C5:0 Isomer	FA	246.17	246.17	[M+H]+	C12H23NO4	0.492534	0.159835	0.831257	0.547275	0.222817	0.833126	0.551188	0.312845	0.891172
Octadecadienamide	Alcohol and amines	280.264	279.256	[M+H]+	C18H33NO	1.43349	0.000692874	0.428246	1.25127	0.00326516	0.545777	0.617134	0.43449	1.15943
Octadecyl monoenamide	Alcohol and amines	282.28	281.271	[M+H]+	C18H35NO	1.46309	0.000100456	0.489577	1.2592	0.00136918	0.626529	0.673388	0.388432	1.13802
MG(22:6)	GL	403.284	402.276	[M+H]+	C25H38O4	1.43513	0.00275701	0.22566	1.24628	0.00614206	0.322732	0.547805	0.81575	1.05508
Docosaenoic acid	FA	327.2	326.224	[M+H]+	C22H30O2	0.845848	0.0284082	0.635162	1.38486	0.000318211	0.251427	1.57471	0.0567988	0.682801
Cis-11,14-Eicosadienoic Acid(C20:2)	FA	309.3	308.271	[M+H]+	C20H36O2	0.449758	0.383037	1.02533	0.104342	0.850886	1.0053	1.46074	0.0532003	1.05653
EPA [5Z,8Z,11Z,14Z,17Z-eicosapentaenoic acid]	Oxidized lipids	303.2	302.224	[M+H]+	C20H30O2	0.955174	0.0111655	0.774081	1.48547	1.54352e-07	0.259753	1.85391	0.0246549	0.782471
Eicosahexaenoic acid	FA	301.2	300.208	[M+H]+	C20H28O2	0.988891	0.0175608	0.605957	1.33553	0.000333309	0.28713	1.52169	0.0774862	0.718073
(2S,3S)-butane-2,3-diol	Alcohol and amines	73.064	90.0681	[M-H2O+H]+	C4H10O2	0.40618	0.459522	1.11445	0.391575	0.252787	0.844152	0.664078	0.591705	1.08088
N-Carbamoyl-L-aspartate	Amino acid and Its metabolomics	177	176.13	[M+H]+	C5H8N2O5	0.719134	0.107072	0.796207	0.50814	0.175614	0.835645	0.805776	0.276021	0.868691
D-panthenol	Alcohol and amines	206	205.25	[M+H]+	C9H19NO4	0.408185	0.298977	0.550591	0.266172	0.463104	0.69774	1.65776	0.161873	0.38562
1-Methyl-6-oxo-1,6-dihydropyridine-3-carboxamide	Heterocyclic compounds	153	152.059	[M+H]+	C7H8N2O2	0.418631	0.235079	0.811862	0.470026	0.154191	0.785157	0.639739	0.358437	0.858465
5-Methoxytryptamine	Alcohol and amines	191	190.111	[M+H]+	C11H14N2O	0.476062	0.349667	1.081	0.272533	0.550005	1.05013	0.800676	0.465388	1.06596
Quinoline-4-carboxylic acid	Organic acid And Its derivatives	174	173.17	[M+H]+	C10H7NO2	0.667866	0.120286	0.911931	1.20501	0.000851443	1.19411	1.80554	0.0281486	0.882475
SDMA	Organic acid And Its derivatives	203	202.25	[M+H]+	C8H18N4O2	0.0230652	0.961506	0.993898	0.357296	0.500454	1.07562	0.156781	0.702577	0.95895
Cis-4-Hydroxy-D-Proline	Amino acid and Its metabolomics	132	131.058	[M+H]+	C5H9NO3	0.111011	0.535895	1.11003	0.161309	0.525757	1.11548	0.379259	0.653761	1.04884
N6-methyladenosine	Nucleotide And Its metabolomics	282	281.112	[M+H]+	C11H15N5O4	0.616787	0.126392	0.872939	0.685422	0.0958269	0.843485	1.39665	0.0963598	0.859936
N-Acetyl-D-Galactosamine	Alcohol and amines	222	221.09	[M+H]+	C8H15NO6	0.234498	0.46383	0.915655	0.869373	0.0270104	0.7272	0.0434346	0.967449	1.00572
L-2-Aminobutyric acid	Organic acid And Its derivatives	104	103.063	[M+H]+	C4H9NO2	0.244686	0.495451	1.05291	1.2069	0.00126501	0.747218	0.677419	0.332795	0.936543
8-Azaguanine	Nucleotide And Its metabolomics	153	152.11	[M+H]+	C4H4N6O	0.622547	0.0255475	2.21862	0.170357	0.0923187	0.418176	0.203981	0.952071	1.02249
16-Dehydroprogesterone	Hormones and hormone related compunds	313	312.209	[M+H]+	C21H28O2	1.45482	3.75352e-06	0.591471	1.41474	6.37948e-06	0.58463	1.111	0.166629	0.907553
Isocytosine	Nucleotide And Its metabolomics	112	111.1	[M+H]+	C4H5N3O	0.0168347	0.777189	0.978042	0.924174	0.0086069	0.773964	0.648182	0.384988	1.08249
Leu-Val	Amino acid and Its metabolomics	231	230.163	[M+H]+	C11H22N2O3	0.0129254	0.487363	1.59597	0.717516	0.0315744	0.305404	0.825712	0.339392	0.641868
Phe-Met	Amino acid and Its metabolomics	297	296.119	[M+H]+	C14H20N2O3S	0.19973	0.467818	0.931882	1.04403	0.0101683	0.710562	0.535709	0.841661	1.01787
Glu-Met	Amino acid and Its metabolomics	279	278.094	[M+H]+	C10H18N2O5S	0.152131	0.753323	1.03983	0.118561	0.520167	1.1091	1.51693	0.105905	1.18957
Met-Glu	Amino acid and Its metabolomics	279	278.094	[M+H]+	C10H18N2O5S	0.124033	0.850813	1.02399	0.058386	0.643098	1.0752	1.21268	0.216055	1.14436
Phe-Val	Amino acid and Its metabolomics	265	264.147	[M+H]+	C14H20N2O3	0.630269	0.226876	1.14853	0.388794	0.375855	1.13243	1.35981	0.172372	1.15445
Carnitine C9:1	FA	300.217	299.21	[M+H]+	C16H29NO4	0.342167	0.570743	1.13047	0.488848	0.206327	0.752528	0.784299	0.60623	1.10414
Carnitine C9:0 Isomer1	FA	302.233	301.225	[M+H]+	C16H31NO4	0.198218	0.44081	0.922118	0.151506	0.7549	0.963845	0.435619	0.71566	1.03852
Carnitine C10:1 Isomer1	FA	314.233	313.225	[M+H]+	C17H31NO4	0.440987	0.204879	0.889245	0.440783	0.427673	0.892643	0.240243	0.548012	0.953178
Carnitine C10:0 Isomer1	FA	316.248	315.241	[M+H]+	C17H33NO4	0.574179	0.115641	0.851892	0.599879	0.196816	0.841063	0.370258	0.549994	0.943796
Carnitine C12:3	FA	338.233	337.225	[M+H]+	C19H31NO4	0.851994	0.081359	1.22853	0.591272	0.0911062	1.26305	0.667414	0.292449	0.890094
Carnitine C13:0 Isomer1	FA	358.295	357.288	[M+H]+	C20H39NO4	0.822808	0.037962	0.780364	0.49236	0.340709	0.87728	0.0441859	0.799983	0.976523
Carnitine C14:2 Isomer 1	FA	368.279	367.272	[M+H]+	C21H37NO4	1.15648	0.00230279	0.706777	0.806161	0.048603	0.737472	0.976507	0.170487	0.881862
Carnitine C15 Isomer1	FA	386.327	385.319	[M+H]+	C22H43NO4	0.992097	0.0111404	0.663895	0.939987	0.0251323	0.665061	0.0411383	0.925397	0.986647
Carnitine C15	FA	386.327	385.319	[M+H]+	C22H43NO4	1.01676	0.0123743	0.624925	0.802477	0.0971785	0.705173	0.12894	0.686396	0.942744
Carnitine C16:2 Isomer1	FA	396.311	395.304	[M+H]+	C23H41NO4	1.13432	0.00273322	0.649922	0.759231	0.0820157	0.726291	0.334132	0.548626	0.940576
Carnitine C14:2:DC	FA	398.254	397.246	[M+H]+	C21H35NO6	1.19369	0.00131335	0.600047	1.05408	0.00286044	0.591555	1.03743	0.226223	0.862768
Carnitine C16:2-OH	FA	412.306	411.298	[M+H]+	C23H41NO5	0.977821	0.0128008	0.718218	0.737164	0.106422	0.74708	0.315333	0.874746	1.01525
Carnitine C18:1 Isomer1	FA	426.358	425.351	[M+H]+	C25H47NO4	1.13823	0.00184084	0.736683	0.754271	0.0974104	0.787371	0.667983	0.529847	1.04874
Carnitine C19	FA	442.389	441.382	[M+H]+	C26H51NO4	1.41912	2.6895e-05	0.499873	1.05286	0.0056305	0.576299	0.98399	0.32276	1.09591
taurolithocholic acid-3-sulfate	FA	281.1	563.259	[M-H]-	C26H45NO8S2	0.0742116	0.739763	1.0485	0.375112	0.337598	1.14642	0.502417	0.606789	0.925421
Chenodeoxycholic acid	FA	391.5	392.293	[M-H]-	C24H40O4	0.690244	0.115028	1.44693	1.22368	0.0101595	0.492141	0.187739	0.712841	0.933185
Ursodeoxycholic acid	FA	391.5	392.293	[M-H]-	C24H40O4	0.18782	0.871658	1.09506	0.533125	0.999203	1.00041	0.955225	0.188729	0.430652
6,7-diketolithocholic acid	FA	403.3	404.256	[M-H]-	C24H38O3	0.178816	0.67732	1.01648	0.287003	0.496166	0.97277	1.20252	0.133001	1.085
Glycocholic acid	FA	464.4	465.309	[M-H]-	C26H43NO6	0.513884	0.176269	1.23977	1.19781	0.00466506	2.10243	0.611135	0.374298	1.19121
Taurochenodeoxycholic acid	FA	498.5	499.297	[M-H]-	C26H45NO6S	0.116729	0.80871	0.752491	0.505929	0.318656	0.155058	0.759125	0.328896	0.173563
Taurocholic acid	FA	514.7	515.292	[M-H]-	C26H45NO7S	0.108284	0.710756	0.654151	0.366752	0.33412	0.208562	0.482246	0.345082	0.226983
12,13-EpOME	FA	295.227	296.235	[M-H]-	C18H32O3	0.731693	0.0711547	0.723929	1.33681	0.000309048	0.363997	1.1122	0.277462	0.827273
FFA(20:4)	FA	303.232	304.24	[M-H]-	C20H32O2	0.601474	0.12082	1.12842	1.45962	1.80841e-06	0.567698	1.44084	0.0810315	0.893397
9,10-DiHOME	FA	313.238	314.246	[M-H]-	C18H34O4	0.204762	0.718841	1.06131	0.0254196	0.992008	0.998311	0.74949	0.432447	0.852188
(±)12-HEPE	FA	317.212	318.219	[M-H]-	C20H30O3	0.913948	0.0196787	0.613279	1.30981	0.000736729	0.342176	0.576711	0.352808	0.859271
15-oxoETE	FA	317.212	318.219	[M-H]-	C20H30O3	0.820542	0.0465373	0.840778	0.961002	0.00775764	0.792292	0.815864	0.264453	1.11091
(±)12-HETE	FA	319.227	320.235	[M-H]-	C20H32O3	0.767908	0.038315	0.804886	1.55894	5.48218e-08	0.218026	1.42431	0.111713	0.846441
(±)9-HETE	FA	319.227	320.235	[M-H]-	C20H32O3	0.465421	0.26587	0.85802	1.56628	1.03472e-06	0.210286	1.95724	0.00599587	0.709106
14(S)-HDHA	FA	343.227	344.235	[M-H]-	C22H32O3	0.581483	0.0938389	0.758468	1.35109	0.000122315	0.313276	1.19833	0.120987	0.782695
TxB3	FA	367.212	368.22	[M-H]-	C20H32O6	0.740957	0.0495467	1.53642	1.20656	0.0100418	2.40731	0.369075	0.506076	1.11344
TXB2	FA	369.228	370.236	[M-H]-	C20H34O6	0.246248	0.534069	0.912098	1.38494	3.89858e-05	0.385633	0.437652	0.608432	0.933032
FFA(10:0)	FA	171.139	172.146	[M-H]-	C10H20O2	0.204037	0.640763	0.958146	0.134559	0.637257	1.06821	2.04793	0.00466541	1.24683
FFA(12:0)	FA	199.17	200.178	[M-H]-	C12H24O2	0.398532	0.32675	0.893527	0.100998	0.841862	0.97575	0.182156	0.687326	1.04764
FFA(14:0)	FA	227.201	228.209	[M-H]-	C14H28O2	0.969052	0.00964618	0.730438	1.006	0.00738489	0.70168	1.30249	0.0890257	0.837112
FFA(15:0)	FA	241.217	242.225	[M-H]-	C15H30O2	1.33541	0.000147572	0.802901	1.52356	2.11959e-07	0.656253	1.46688	0.104523	0.907221
FFA(16:0)	FA	255.232	256.24	[M-H]-	C16H32O2	0.638449	0.101931	0.918809	1.28449	0.000104173	0.757423	0.986275	0.24028	0.947763
FFA(17:0)	FA	269.248	270.256	[M-H]-	C17H34O2	0.831371	0.0345011	0.891596	1.46234	2.01418e-06	0.611622	2.07496	0.00534814	0.892225
FFA(18:0)	FA	283.264	284.272	[M-H]-	C18H36O2	0.499302	0.294343	1.04749	1.10244	0.00345984	0.843139	0.618707	0.556081	0.977163
FFA(20:0)	FA	311.295	312.303	[M-H]-	C20H40O2	0.0501129	0.859916	1.04273	0.141465	0.629321	0.933323	0.303892	0.754366	0.954874
FFA(22:0)	FA	339.326	340.334	[M-H]-	C22H44O2	0.375223	0.534257	0.940355	0.5881	0.124058	1.18185	0.797271	0.242812	1.11784
FFA(24:0)	FA	367.358	368.365	[M-H]-	C24H48O2	0.126342	0.769187	1.02721	0.221224	0.657347	0.955512	0.791172	0.33789	1.10329
FFA(14:1)	FA	225.185	226.193	[M-H]-	C14H26O2	1.18831	0.000787664	0.680136	1.00904	0.0060009	0.677106	1.54643	0.052335	0.821667
FFA(16:1)	FA	253.217	254.225	[M-H]-	C16H30O2	1.16816	0.00157283	0.528478	1.10277	0.00143814	0.497478	1.15764	0.19825	0.802815
FFA(17:1)	FA	267.232	268.24	[M-H]-	C17H32O2	1.34417	0.000162835	0.583415	1.24248	9.98985e-05	0.522221	1.11927	0.172013	0.86458
FFA(18:1)	FA	281.248	282.256	[M-H]-	C18H34O2	1.23692	0.000301112	0.755931	1.2445	0.000121939	0.686174	0.60273	0.494926	0.963081
FFA(19:1)	FA	295.264	296.272	[M-H]-	C19H36O2	1.34062	0.000126683	0.615999	1.02504	0.00224529	0.635788	1.2057	0.105537	0.872122
FFA(20:1)	FA	309.279	310.287	[M-H]-	C20H38O2	1.31564	0.00033095	0.702779	1.04798	0.00439072	0.661563	1.35809	0.0659929	0.858686
FFA(22:1)	FA	337.311	338.318	[M-H]-	C22H42O2	0.372148	0.436855	0.891135	0.556535	0.18355	0.815062	0.997605	0.299811	0.860524
FFA(24:1)	FA	365.342	366.35	[M-H]-	C24H46O2	0.212346	0.838413	0.975332	0.0813136	0.633783	1.07716	0.734802	0.455758	0.924549
FFA(18:2)	FA	279.232	280.24	[M-H]-	C18H32O2	1.30242	0.000286368	0.75724	1.21877	0.000179126	0.657455	1.22305	0.155199	0.917834
FFA(20:2)	FA	307.264	308.272	[M-H]-	C20H36O2	0.917784	0.0137554	0.751362	0.591471	0.239023	0.810451	0.412627	0.6359	0.942457
FFA(22:2)	FA	335.295	336.303	[M-H]-	C22H40O2	1.05575	0.00702212	0.726958	0.838229	0.0608064	0.700021	1.60362	0.088073	0.769726
FFA(24:2)	FA	363.326	364.334	[M-H]-	C24H44O2	0.213834	0.487086	0.938748	0.115175	0.711706	1.065	0.814648	0.379403	0.906964
FFA(18:3)	FA	277.217	278.225	[M-H]-	C18H30O2	1.25783	0.000365693	0.644143	1.37278	1.16902e-05	0.484926	0.893837	0.369578	0.902924
FFA(22:3)	FA	333.279	334.287	[M-H]-	C22H38O2	0.697823	0.0808369	0.881406	0.515715	0.314612	0.889802	1.53475	0.0514648	0.862323
FFA(18:4)	FA	275.201	276.209	[M-H]-	C18H28O2	1.34796	0.000562091	0.584831	1.54967	1.85503e-05	0.388252	1.30107	0.138386	0.832796
FFA(22:4)	FA	331.264	332.272	[M-H]-	C22H36O2	0.486472	0.204469	0.913755	0.552137	0.254005	0.865618	0.677718	0.409841	0.940916
FFA(24:4)	FA	359.295	360.303	[M-H]-	C24H40O2	0.109027	0.861607	0.986378	0.240345	0.718419	0.953271	0.0462274	0.977988	1.0023
FFA(20:5)	FA	301.217	302.225	[M-H]-	C20H30O2	0.733645	0.0805144	0.806849	1.33179	0.000277981	0.509341	0.759415	0.314888	0.894544
FFA(22:5)	FA	329.248	330.256	[M-H]-	C22H34O2	1.22929	0.00144173	0.617394	1.19256	0.000241109	0.50537	1.57649	0.0594892	0.811256
FFA(24:5)	FA	357.279	358.287	[M-H]-	C24H38O2	0.324718	0.36272	0.895412	0.591462	0.207983	0.809893	1.2053	0.100514	0.823352
FFA(22:6)	FA	327.232	328.24	[M-H]-	C22H32O2	0.173328	0.603391	1.06308	0.815472	0.0442674	0.734446	0.84964	0.257902	1.1306
FFA(24:6)	FA	355.264	356.272	[M-H]-	C24H36O2	0.0687438	0.841023	1.02163	0.509102	0.23972	0.850244	1.3554	0.0665015	0.828385
LPC(0:0/17:0)	GP	554.346	509.348	[M+COOH]-	C25H52NO7P	0.301282	0.424097	1.06312	0.911786	0.0240127	0.808744	0.0334525	0.979654	1.00194
LPC(18:0/0:0)	GP	568.361	523.364	[M+COOH]-	C26H54NO7P	0.82007	0.0167088	1.25576	1.01839	0.00717414	0.789568	0.430374	0.608791	0.964543
LPC(24:0/0:0)	GP	652.455	607.458	[M+COOH]-	C32H66NO7P	0.241503	0.562925	0.930398	0.587421	0.129138	0.831213	0.151357	0.889591	1.01486
LPC(0:0/18:1)	GP	566.346	521.348	[M+COOH]-	C26H52NO7P	0.0934016	0.858907	1.01631	1.15731	0.00151234	0.740685	0.441527	0.697168	0.973228
LPC(22:2/0:0)	GP	620.393	575.395	[M+COOH]-	C30H58NO7P	0.51002	0.114623	1.2364	0.121898	0.789413	0.963978	0.363467	0.778815	0.962696
LPC(20:4/0:0)	GP	588.33	543.332	[M+COOH]-	C28H50NO7P	0.759113	0.18251	1.16177	0.499621	0.229331	0.853785	0.937703	0.207072	0.848466
LPC(20:5/0:0)	GP	586.314	541.317	[M+COOH]-	C28H48NO7P	0.482019	0.207826	1.20381	0.184453	0.581354	0.930473	0.648567	0.323799	0.881328
LPC(22:5/0:0)	GP	614.33	537.379	[M+COOH]-	C30H52NO7P	0.24562	0.428646	1.0996	0.831052	0.0411287	0.741405	0.356163	0.77757	0.962131
LPC(22:6/0:0)	GP	612.33	567.332	[M+COOH]-	C30H50NO7P	0.844427	0.0252814	1.20256	1.06717	0.00327906	0.748588	0.231596	0.764493	0.975632
LPE(17:0/0:0)	GP	466.278	-	[M-H]-	C21H44NO7P	1.55043	1.69276e-07	0.623015	1.5446	4.69477e-08	0.597155	0.0369607	0.936013	0.995647
LPE(0:0/18:1)	GP	478.293	479.301	[M-H]-	C23H46NO7P	1.10123	0.00473533	0.725647	1.17793	0.00158795	0.690037	1.25184	0.125213	1.19899
LPE(18:1/0:0)	GP	478.293	479.301	[M-H]-	C23H46NO7P	1.41495	4.6414e-05	0.69975	1.55353	1.68864e-07	0.530293	0.0277489	0.919428	1.00687
LPE(18:2/0:0)	GP	476.278	477.286	[M-H]-	C23H44NO7P	1.44494	9.37153e-06	0.644806	1.63277	5.95541e-11	0.324488	0.212394	0.955517	0.995431
LPE(22:5/0:0)	GP	526.293	527.301	[M-H]-	C27H46NO7P	1.47117	2.66785e-05	0.60581	1.65434	8.7576e-08	0.286529	0.951573	0.250917	0.92258
LPE(22:6/0:0)	GP	524.278	525.286	[M-H]-	C27H44NO7P	1.44493	6.84533e-05	0.631449	1.64602	1.92166e-07	0.321671	0.812415	0.35998	1.07847
LPG(18:0/0:0)	GP	511.304	512.311	[M-H]-	C24H49O9P	1.11008	0.0036422	0.68271	1.54689	3.49371e-06	0.394042	1.38511	0.122419	0.83606
LPG(18:1/0:0)	GP	509.288	510.296	[M-H]-	C24H47O9P	0.701851	0.10161	1.09513	0.972425	0.0117536	0.862408	0.175088	0.907624	0.992938
LPI(18:0/0:0)	GP	599.32	600.327	[M-H]-	C27H53O12P	0.122011	0.938064	0.992287	1.40088	0.00056921	0.562698	1.03095	0.161232	0.854135
LPI(18:2/0:0)	GP	595.288	596.296	[M-H]-	C27H49O12P	1.00132	0.00801185	1.36823	1.32194	0.000282168	0.50728	1.73776	0.0294843	0.717998
LPI(20:4/0:0)	GP	619.288	620.296	[M-H]-	C29H49O12P	1.35598	0.000427369	1.95419	1.39618	0.000191895	0.528141	0.540077	0.632631	0.945854
PC(16:0_16:0)	GP	778.56	733.562	[M+COOH]-	C40H80NO8P	0.891286	0.0479248	0.884465	0.817776	0.0403534	0.903921	1.10254	0.177041	1.0591
PC(18:0_18:0)	GP	834.622	789.625	[M+COOH]-	C44H88NO8P	1.31945	0.000129634	1.61284	0.597753	0.105581	1.18506	0.157297	0.832915	0.980842
PC(14:0_18:1)	GP	776.544	731.547	[M+COOH]-	C40H78NO8P	1.16419	0.00290301	0.879731	0.174458	0.726138	0.986174	2.30987	0.0019388	0.84971
PC(16:0_20:1)	GP	832.607	787.609	[M+COOH]-	C44H86NO8P	1.09764	0.0071294	0.810213	1.24655	0.000765429	0.789034	0.307378	0.587776	1.02464
PC(19:0_18:1)	GP	846.622	801.625	[M+COOH]-	C45H88NO8P	0.39105	0.399366	1.07884	0.757713	0.0702251	0.837128	0.522265	0.670715	0.952915
PC(18:1_20:0)	GP	860.638	815.64	[M+COOH]-	C46H90NO8P	0.862399	0.0166481	1.59546	0.601768	0.140789	1.41005	0.0318882	0.850394	1.01638
PC(18:1_22:0)	GP	888.669	843.672	[M+COOH]-	C48H94NO8P	0.527238	0.319389	0.911237	0.270154	0.556506	0.94336	0.862458	0.342277	0.922816
PC(24:0_18:1)	GP	916.701	871.703	[M+COOH]-	C50H98NO8P	0.344218	0.504235	0.94569	0.160705	0.773717	0.978378	0.663443	0.381377	1.06382
PC(16:1_16:1)	GP	774.529	729.531	[M+COOH]-	C40H76NO8P	1.07594	0.00684427	0.569292	0.489841	0.271577	0.824761	0.721888	0.512678	1.10512
PC(16:1_18:1)	GP	802.56	757.562	[M+COOH]-	C42H80NO8P	1.40962	8.99071e-05	0.615085	1.06568	0.00468152	0.715529	0.288146	0.870272	0.982088
PC(17:0_18:2)	GP	816.575	771.578	[M+COOH]-	C43H82NO8P	0.515891	0.252968	0.93279	0.309172	0.595431	0.965567	1.16667	0.151609	1.09322
PC(18:1_18:1)	GP	830.591	785.593	[M+COOH]-	C44H84NO8P	1.34361	0.000186326	0.767339	0.825001	0.0731722	0.81322	0.833813	0.273591	1.06865
PC(18:1_20:1)	GP	858.622	813.625	[M+COOH]-	C46H88NO8P	0.242099	0.729665	0.971495	0.579999	0.250561	0.878341	0.0770216	0.929975	1.00692
PC(18:2_20:0)	GP	858.622	813.625	[M+COOH]-	C46H88NO8P	0.907296	0.0118363	1.49401	0.546932	0.159529	1.45824	1.03955	0.249659	0.930061
PC(18:1_24:1)	GP	914.685	869.687	[M+COOH]-	C50H96NO8P	0.252367	0.608769	0.955654	0.12043	0.616113	1.05041	0.0542999	0.594483	1.06422
PC(24:0_18:2)	GP	914.685	869.687	[M+COOH]-	C50H96NO8P	0.266147	0.715828	0.968763	0.146111	0.579392	1.05347	0.593983	0.501265	1.03559
PC(16:1_18:2)	GP	800.544	755.547	[M+COOH]-	C42H78NO8P	1.51621	1.02691e-05	0.5544	1.38079	2.25873e-05	0.571023	0.109793	0.977648	0.997277
PC(18:1_18:2)	GP	828.575	783.578	[M+COOH]-	C44H82NO8P	1.2627	0.000659677	0.827318	0.400668	0.420028	0.935219	1.97204	0.00900781	1.15341
PC(19:1_18:2)	GP	842.591	797.593	[M+COOH]-	C45H84NO8P	0.688305	0.0634901	0.81603	0.443256	0.382435	0.901909	1.59871	0.0535639	0.832974
PC(18:0_20:3)	GP	856.607	811.609	[M+COOH]-	C46H86NO8P	1.39997	0.00024737	1.61834	0.674373	0.0988836	1.2405	0.82098	0.422462	1.03761
PC(20:1_18:2)	GP	856.607	811.609	[M+COOH]-	C46H86NO8P	0.73939	0.0897916	0.893096	0.605123	0.160527	0.911542	1.21177	0.143093	0.922072
PC(20:2_18:1)	GP	856.607	811.609	[M+COOH]-	C46H86NO8P	0.117986	0.682605	1.03546	0.413055	0.265006	1.41166	0.0102026	0.954039	1.00564
PC(20:0_20:3)	GP	884.638	839.64	[M+COOH]-	C48H90NO8P	1.18958	0.00225874	2.27672	0.827704	0.0701524	1.93533	0.0975083	0.884031	1.01219
PC(16:1_18:3)	GP	798.529	753.531	[M+COOH]-	C42H76NO8P	1.26189	0.000200797	0.581684	1.11433	0.0013769	0.58168	0.33003	0.812712	1.0362
PC(16:2_18:2)	GP	798.529	753.531	[M+COOH]-	C42H76NO8P	1.19047	0.00114984	0.451913	1.16877	0.00176052	0.416368	0.961632	0.175483	0.800306
PC(18:2_18:2)	GP	826.56	781.562	[M+COOH]-	C44H80NO8P	0.512824	0.227023	0.884883	0.672269	0.0648519	0.840488	0.0386407	0.989318	1.00111
PC(18:3_18:1)	GP	826.56	781.562	[M+COOH]-	C44H80NO8P	0.407678	0.459094	0.90422	1.01778	0.0122019	0.710136	1.27723	0.165571	1.15968
PC(20:3_18:1)	GP	854.591	809.593	[M+COOH]-	C46H84NO8P	0.856819	0.0238289	1.28495	0.300892	0.229982	1.30233	0.269667	0.731143	0.977185
PC(22:4_16:0)	GP	854.591	809.593	[M+COOH]-	C46H84NO8P	0.57588	0.097503	1.2483	0.348422	0.465136	1.06063	0.919434	0.304201	1.08794
PC(19:0_20:4)	GP	868.607	823.609	[M+COOH]-	C47H86NO8P	0.891618	0.0416692	1.12885	0.641504	0.0891452	1.12795	1.07244	0.230966	1.07897
PC(20:1_20:3)	GP	882.622	837.625	[M+COOH]-	C48H88NO8P	0.669166	0.076255	1.26263	0.322173	0.311836	1.21192	0.632952	0.289819	0.880874
PC(20:4_16:1)	GP	824.544	779.547	[M+COOH]-	C44H78NO8P	1.25655	0.00145555	0.626987	1.09931	0.00405261	0.678441	0.40173	0.494191	0.924613
PC(18:2_18:3)	GP	824.544	779.547	[M+COOH]-	C44H78NO8P	0.0772318	0.953663	1.00682	0.362325	0.344892	0.904169	0.675969	0.51369	1.07053
PC(18:1_20:4)	GP	852.575	807.578	[M+COOH]-	C46H82NO8P	0.261968	0.709953	0.970641	0.0213553	0.842625	1.01655	0.0943979	0.948307	0.996319
PC(20:5_18:0)	GP	852.575	807.578	[M+COOH]-	C46H82NO8P	0.0968596	0.835008	0.974431	0.0416061	0.960167	1.00668	0.759671	0.261647	0.87786
PC(18:2_20:3)	GP	852.575	807.578	[M+COOH]-	C46H82NO8P	0.48588	0.0929666	1.31594	0.748453	0.0554987	1.51267	0.407519	0.773255	1.03058
PC(20:1_20:4)	GP	880.607	835.609	[M+COOH]-	C48H86NO8P	0.109679	0.846858	1.01515	0.0803988	0.989932	1.00145	0.914027	0.263637	0.891642
PC(22:4_18:1)	GP	880.607	835.609	[M+COOH]-	C48H86NO8P	0.749156	0.0973259	1.3448	0.526598	0.345869	1.17108	0.0755607	0.816638	0.956898
PC(18:2_20:4)	GP	850.56	805.562	[M+COOH]-	C46H80NO8P	0.881223	0.0110897	1.35744	0.813072	0.0363191	1.18523	0.617243	0.43291	1.06576
PC(16:1_22:5)	GP	850.56	805.562	[M+COOH]-	C46H80NO8P	0.683929	0.126905	0.699529	0.555379	0.0776945	0.72267	0.255046	0.631398	0.914891
PC(18:1_22:5)	GP	878.591	833.593	[M+COOH]-	C48H84NO8P	0.293021	0.611473	0.940064	0.263682	0.548136	0.928726	1.182	0.105017	1.25392
PC(20:2_20:4)	GP	878.591	833.593	[M+COOH]-	C48H84NO8P	0.269213	0.575074	1.09134	0.234035	0.688348	1.06811	1.05758	0.194682	0.818959
PC(20:0_22:6)	GP	906.622	861.625	[M+COOH]-	C50H88NO8P	0.982837	0.00350315	1.80414	0.696192	0.0786363	1.62311	0.909298	0.437604	1.10592
PC(18:2_20:5)	GP	848.544	803.547	[M+COOH]-	C46H78NO8P	0.288686	0.294272	1.2166	0.592269	0.0834028	1.2954	0.236441	0.415903	1.17145
PC(20:3_20:4)	GP	876.575	831.578	[M+COOH]-	C48H82NO8P	1.03101	0.00943684	2.41387	0.879834	0.0407925	1.85014	1.40802	0.0849948	1.41662
PC(18:2_22:6)	GP	874.56	829.562	[M+COOH]-	C48H80NO8P	0.771074	0.014022	1.65136	0.962549	0.0171688	1.36075	1.21411	0.158741	1.17437
PE(18:1_18:0)	GP	744.554	745.562	[M-H]-	C41H80NO8P	1.48622	0.00053628	0.484128	1.02988	0.0105558	0.651163	0.882403	0.485315	1.08418
PE(20:1_18:0)	GP	772.586	773.593	[M-H]-	C43H84NO8P	0.81604	0.0494291	0.72095	0.595646	0.139428	0.79243	1.91836	0.03916	1.28454
PE(18:2_16:0)	GP	714.507	715.515	[M-H]-	C39H74NO8P	1.66287	7.90398e-06	0.268248	1.37166	0.000104446	0.467767	0.225933	0.819596	1.02553
PE(18:0_18:2)	GP	742.539	743.547	[M-H]-	C41H78NO8P	1.61553	6.35131e-05	0.351219	1.28199	0.00124749	0.564262	0.996437	0.36782	1.10319
PE(20:2_16:0)	GP	742.539	743.547	[M-H]-	C41H78NO8P	1.21572	0.000580403	0.521672	0.191478	0.65658	0.933439	0.54546	0.455202	1.10322
PE(19:0_18:2	GP	756.554	757.562	[M-H]-	C42H80NO8P	1.15435	0.00387363	0.61776	1.07837	0.00447834	0.617012	0.31343	0.538202	0.922956
PE(20:2_18:0)	GP	770.57	771.578	[M-H]-	C43H82NO8P	1.25816	0.00104527	0.492911	0.526223	0.255276	0.815941	0.723593	0.432016	1.11982
PE(20:0_18:2)	GP	770.57	771.578	[M-H]-	C43H82NO8P	1.13986	0.00159462	0.673173	1.00973	0.0230324	0.736591	0.83428	0.316225	1.10198
PE(18:1_24:1)	GP	826.633	827.64	[M-H]-	C47H90NO8P	0.265441	0.499913	1.06343	0.172353	0.486078	1.08276	1.10761	0.249899	1.09533
PE(18:3_16:0)	GP	712.492	713.5	[M-H]-	C39H72NO8P	1.48725	4.79613e-05	0.254169	1.3288	0.000440118	0.429959	0.0790616	0.998155	0.999677
PE(20:1_18:2)	GP	768.554	769.562	[M-H]-	C43H80NO8P	1.36215	0.00196529	0.427516	0.78868	0.067626	0.696811	1.29186	0.313977	1.15682
PE(16:0_20:4)	GP	738.507	739.515	[M-H]-	C41H74NO8P	1.58439	4.60912e-05	0.370926	0.991726	0.0116498	0.693639	0.591546	0.643924	1.05182
PE(16:0_22:4)	GP	766.539	767.547	[M-H]-	C43H78NO8P	0.876003	0.0300689	0.676372	0.734181	0.056315	0.756032	1.42617	0.122566	1.24011
PE(20:4_20:0)	GP	794.57	795.578	[M-H]-	C45H82NO8P	0.706738	0.16538	0.777183	0.46885	0.478624	0.873553	1.25718	0.120982	1.28502
PE(16:0_20:5)	GP	736.492	737.5	[M-H]-	C41H72NO8P	1.03935	0.00656454	0.494172	0.614211	0.138636	0.710036	0.38741	0.774255	0.9363
PE(18:0_20:5)	GP	764.523	765.531	[M-H]-	C43H76NO8P	1.35441	0.00599988	0.318697	0.599667	0.12883	0.669817	0.5171	0.890816	1.0294
PE(16:0_22:5)	GP	764.523	765.531	[M-H]-	C43H76NO8P	1.59318	0.000284021	0.21733	1.20109	0.00399277	0.451025	1.54739	0.115323	1.26958
PE(22:6_16:0)	GP	762.507	763.515	[M-H]-	C43H74NO8P	1.65582	6.78402e-06	0.390628	1.05069	0.00729909	0.696298	2.22433	0.00498392	1.28677
PE(18:1_22:5)	GP	790.539	791.547	[M-H]-	C45H78NO8P	0.870811	0.0530603	0.768564	1.02612	0.00967264	0.712308	0.241084	0.831853	0.976599
PE(20:4_22:2)	GP	818.57	819.578	[M-H]-	C47H82NO8P	0.493346	0.171157	1.13151	0.712134	0.0343023	1.29262	2.31125	0.00492192	1.38874
PG(18:0_18:0)	GP	777.577	778.572	[M-H]-	C42H83O10P	0.29175	0.471657	0.911986	0.650998	0.168727	0.822241	1.71208	0.0587685	0.793521
PG(18:2_16:0)	GP	745.51	746.51	[M-H]-	C40H75O10P	1.19089	0.00350197	0.447352	0.392584	0.233989	0.793574	1.20523	0.142675	1.29465
PG(18:0_18:2)	GP	773.541	774.541	[M-H]-	C42H79O10P	1.40659	0.000157664	0.476157	1.08663	0.00246096	0.577561	2.15766	0.00522286	1.39709
PG(18:2_18:2)	GP	769.51	770.51	[M-H]-	C42H75O10P	0.30406	0.714292	0.926846	0.262465	0.58165	0.888942	0.496815	0.504708	0.889055
PI(16:0_18:1)	GP	835.541	836.541	[M-H]-	C43H81O13P	0.770877	0.0720801	1.19313	0.0997998	0.664754	1.05856	0.465139	0.694516	0.948954
PI(17:0_18:1)	GP	849.549	850.557	[M-H]-	C44H83O13P	1.19764	0.00676371	0.565046	0.183058	0.324116	1.3167	0.681534	0.202301	1.16665
PI(18:0_18:1)	GP	863.573	864.573	[M-H]-	C45H85O13P	0.68464	0.0642742	1.23762	0.329902	0.3432	1.18214	0.952004	0.284912	1.14752
PI(18:0_19:1)	GP	877.581	892.604	[M-H]-	C47H89O13P	0.39562	0.461759	0.923881	0.497884	0.138118	1.2304	1.47652	0.086634	1.2523
PI(18:2_16:0)	GP	833.526	834.526	[M-H]-	C43H79O13P	0.0616868	0.616629	1.06323	0.853809	0.0429162	0.809611	0.460877	0.569751	1.05611
PI(16:1_18:1)	GP	833.526	834.526	[M-H]-	C43H79O13P	0.474954	0.231977	1.28829	0.456021	0.294194	0.742863	0.636883	0.670521	0.904094
PI(17:0_18:2)	GP	847.534	848.541	[M-H]-	C44H81O13P	0.650324	0.0937234	1.29305	0.381871	0.699291	0.926409	0.678457	0.396062	1.14472
PI(18:0_18:2)	GP	861.557	862.557	[M-H]-	C45H83O13P	0.477102	0.317253	0.907191	0.238767	0.907905	0.983795	0.747122	0.388892	1.05657
PI(18:1_18:1)	GP	861.557	862.557	[M-H]-	C45H83O13P	0.47171	0.320402	0.860488	0.598961	0.191024	0.813706	0.104535	0.844652	1.02715
PI(18:1_18:2)	GP	859.541	860.541	[M-H]-	C45H81O13P	0.29892	0.39875	1.10983	0.340084	0.379069	0.910113	0.23033	0.705544	1.04139
PI(16:0_20:3)	GP	859.541	860.541	[M-H]-	C45H81O13P	0.807385	0.0211133	1.50548	0.0280763	0.588551	1.14566	1.30443	0.135123	1.17775
PI(20:3_18:0)	GP	887.573	888.573	[M-H]-	C47H85O13P	0.764432	0.0210087	1.38957	0.445983	0.412313	0.872144	0.621793	0.639997	1.05152
PI(18:2_18:2)	GP	857.526	858.526	[M-H]-	C45H79O13P	0.559263	0.071245	1.46534	0.456234	0.406259	1.13096	0.579633	0.524959	0.897552
PI(16:0_20:4)	GP	857.526	858.526	[M-H]-	C45H79O13P	0.10037	0.550273	1.05753	0.999841	0.00747096	0.773964	0.340479	0.716594	1.02038
PI(17:0_20.4)	GP	871.534	872.541	[M-H]-	C46H81O13P	0.366329	0.441641	0.936838	1.35936	2.6109e-05	0.637186	0.466028	0.698712	0.968169
PI(18:0_20:4)	GP	885.557	886.557	[M-H]-	C47H83O13P	0.545548	0.143524	1.1036	0.914434	0.0129962	0.837668	0.00847101	0.990109	0.999275
PI(19:0_20:4)	GP	899.565	872.541	[M-H]-	C46H81O13P	0.0366113	0.840176	1.03316	0.41831	0.365825	0.844686	1.14846	0.149289	1.22943
PI(18:0_22:4)	GP	913.588	914.588	[M-H]-	C49H87O13P	1.07833	0.00647917	1.66661	0.319268	0.29264	1.25743	1.42094	0.0961776	1.27726
PI(20:4_18:1)	GP	883.541	884.541	[M-H]-	C47H81O13P	0.463311	0.144771	1.24113	0.210433	0.395427	0.891481	0.478943	0.65409	1.05769
PI(18:0_22:5)	GP	911.573	912.573	[M-H]-	C49H85O13P	0.119814	0.668189	1.0688	0.39354	0.326816	0.824414	0.658113	0.278512	0.82863
PI(16:0_22:6)	GP	881.526	882.526	[M-H]-	C47H79O13P	0.131343	0.834356	0.960825	0.0891068	0.999856	0.999971	1.25183	0.267951	1.16667
PI(18:1_20:5)	GP	881.526	882.526	[M-H]-	C47H79O13P	0.974283	0.0228316	2.14338	0.450917	0.989538	1.00386	0.103573	0.324782	1.28783
PI(18:0_22:6)	GP	909.557	910.557	[M-H]-	C49H83O13P	0.00397732	0.835954	1.02787	0.723251	0.0659757	0.822296	0.939073	0.205044	1.20435
PI(20:2_20:4)	GP	909.557	910.557	[M-H]-	C49H83O13P	0.35697	0.0597068	1.72646	0.64234	0.868095	0.919434	0.472255	0.104808	1.54491
PS(18:0_18:0)	GP	790.56	791.568	[M-H]-	C42H82NO10P	1.6278	5.54735e-05	0.330245	1.21295	0.00117777	0.536227	2.023	0.00724741	1.39659
PS(18:1_20:0)	GP	816.575	817.583	[M-H]-	C44H84NO10P	1.06794	0.00895806	1.3222	0.352229	0.372907	0.894193	0.38631	0.6263	1.05822
PS(18:0_22:5)	GP	836.544	837.552	[M-H]-	C46H80NO10P	0.647534	0.154958	1.23668	0.392764	0.273874	1.19938	0.826032	0.410934	1.12131
CerP(d18:1/24:0)	SL	728.596	729.604	[M-H]-	C42H84NO6P	0.695026	0.0955247	0.882205	0.845798	0.0386207	0.832646	1.11673	0.134017	1.10932
CerP(d18:1/18:1)	SL	642.486	643.494	[M-H]-	C36H70NO6P	0.0722511	0.92481	1.01797	0.55724	0.108113	0.738737	1.29332	0.117142	0.711656
PA(18:0_22:6)	GP	747.496	748.504	[M-H]-	C43H73O8P	0.114931	0.884452	1.02691	0.37261	0.545589	0.91012	1.19008	0.220665	1.17427
DL-Carnitine	FA	162.113	161.105	[M+H]+	C7H15NO3	0.916508	0.0377227	1.45248	0.773701	0.0539445	1.65251	0.273718	0.765649	0.96335
Carnitine C2:0	FA	204.124	203.116	[M+H]+	C9H17NO4	0.610062	0.144572	1.10483	0.118995	0.766012	1.01893	0.990482	0.249544	1.12848
Carnitine C3:0	FA	218.14	217.131	[M+H]+	C10H19NO4	0.716444	0.0872645	1.36717	0.622753	0.10496	1.40703	0.828702	0.428151	1.10558
Carnitine C4:0	FA	232.155	231.147	[M+H]+	C11H21NO4	0.531124	0.237408	1.21331	0.565915	0.162329	1.25187	0.16017	0.547892	0.928511
Carnitine C5:0	FA	246.171	245.163	[M+H]+	C12H23NO4	0.104987	0.623308	0.774887	0.0525157	0.645327	1.3165	0.83003	0.490221	1.37012
Carnitine C4-OH	FA	248.15	247.142	[M+H]+	C11H21NO5	0.262606	0.708957	1.0262	0.439121	0.358824	0.919558	1.58289	0.0603873	1.1558
Carnitine C6:0	FA	260.187	259.178	[M+H]+	C13H25NO4	0.0913735	0.802977	0.980202	0.428018	0.446715	0.915812	0.663959	0.317089	0.924058
Carnitine C5-OH	FA	262.166	261.158	[M+H]+	C12H23NO5	0.119151	0.962252	0.995568	0.336835	0.502837	1.06278	1.33481	0.0687169	0.817863
Carnitine C6-OH	FA	276.182	275.173	[M+H]+	C13H25NO5	0.598909	0.201632	1.14822	0.0816708	0.960349	1.00966	0.0386648	0.933693	0.989365
Carnitine C8:0	FA	288.218	287.21	[M+H]+	C15H29NO4	0.0504244	0.8422	0.97957	0.265774	0.623649	0.937334	1.19189	0.156748	0.848269
Carnitine C6-2OH	FA	290.161	289.153	[M+H]+	C13H23NO6	0.510673	0.276644	0.895801	0.191608	0.518458	0.954255	1.07613	0.157733	0.889728
Carnitine C10:0	FA	316.25	315.241	[M+H]+	C17H33NO4	0.807241	0.0326027	0.849749	0.702076	0.126334	0.817504	1.35711	0.0905344	0.870518
Carnitine C12:0	FA	344.281	343.272	[M+H]+	C19H37NO4	1.07035	0.0032406	0.706889	0.956601	0.012837	0.689485	1.35236	0.0672694	0.841473
Carnitine C13:0	FA	358.295	357.288	[M+H]+	C20H39NO4	0.983846	0.0126244	0.732588	0.580867	0.393773	0.8437	0.330326	0.882815	1.01314
Carnitine C12-OH	FA	360.276	359.267	[M+H]+	C19H37NO5	0.808543	0.134159	0.152915	0.680009	0.193655	0.263985	0.843573	0.238518	0.338815
Carnitine C14:0	FA	372.313	371.304	[M+H]+	C21H41NO4	1.1309	0.0031904	0.621294	0.932877	0.0238216	0.647877	0.822395	0.213788	0.865624
Carnitine C15:0	FA	386.325	385.319	[M+H]+	C22H43NO4	1.03939	0.00695626	0.648102	0.843583	0.0762975	0.699708	0.0499804	0.787597	0.965444
Carnitine C12:1-2OH	FA	374.255	373.246	[M+H]+	C19H35NO6	0.715502	0.0658253	0.921921	0.0754643	0.875484	0.993471	1.47222	0.0549547	0.904596
Carnitine C14-OH	FA	388.307	387.298	[M+H]+	C21H41NO5	1.02952	0.00308063	0.605545	0.823502	0.0284492	0.653046	0.360338	0.725267	1.04665
Carnitine C16:0	FA	400.344	399.335	[M+H]+	C23H45NO4	0.831854	0.0372541	0.810499	0.96403	0.0123456	0.688518	0.322417	0.554602	0.96024
Carnitine C16-OH	FA	416.339	415.33	[M+H]+	C23H45NO5	1.31562	1.57537e-05	0.56038	1.04998	0.00690879	0.588267	0.270558	0.638533	1.04356
Carnitine C18:0	FA	428.375	427.366	[M+H]+	C25H49NO4	0.568675	0.154161	0.898676	0.901882	0.0347328	0.764005	0.268666	0.815291	1.01484
Carnitine C20:0	FA	456.404	455.397	[M+H]+	C27H53NO4	0.173067	0.737115	0.965456	0.521246	0.308206	0.888453	0.744932	0.319007	0.922188
Carnitine C18-OH	FA	444.37	443.361	[M+H]+	C25H49NO5	0.64939	0.117806	0.852197	0.609419	0.296661	0.865056	0.760622	0.324391	1.10685
Carnitine C3:1-2OH	FA	248.113	247.106	[M+H]+	C10H17NO6	0.397044	0.443996	1.04897	0.218662	0.783948	0.973956	1.41945	0.0709325	1.14456
Carnitine C4:1-2OH	FA	262.129	261.121	[M+H]+	C11H19NO6	0.624569	0.153798	1.17288	0.332312	0.424776	1.09037	0.0512743	0.944568	1.00942
Carnitine C5:1	FA	244.155	243.147	[M+H]+	C12H21NO4	0.236326	0.393	0.85042	0.590041	0.0911447	0.681782	1.76044	0.0618795	0.62331
Carnitine C6:1	FA	258.171	257.163	[M+H]+	C13H23NO4	0.267979	0.805852	1.03404	0.318665	0.470404	1.10766	1.24983	0.146096	0.786679
Carnitine C5:1-2OH	FA	274.13	273.121	[M+H]+	C12H19NO6	1.02157	0.0103529	0.90458	0.124051	0.696729	0.98733	0.363175	0.600038	0.98189
Carnitine C8:1	FA	286.203	285.194	[M+H]+	C15H27NO4	0.353929	0.626943	1.0802	0.38528	0.616124	1.07448	1.47521	0.0899995	0.742743
Carnitine C10:1	FA	314.234	313.225	[M+H]+	C17H31NO4	0.0760715	0.784947	0.976148	0.405867	0.421118	0.902922	1.60575	0.0442114	0.83689
Carnitine C12:1	FA	342.265	341.257	[M+H]+	C19H35NO4	1.25581	0.000421079	0.585167	1.04958	0.00162547	0.580694	1.52222	0.03576	0.77195
Carnitine C12:1-OH	FA	358.26	357.252	[M+H]+	C19H35NO5	0.572736	0.110827	0.828104	0.659119	0.123726	0.770209	0.542073	0.478483	0.918608
Carnitine C14:1	FA	370.297	369.288	[M+H]+	C21H39NO4	1.18626	0.00102827	0.694942	0.928097	0.0165636	0.68352	1.45636	0.0507354	0.834808
Carnitine C14:1-OH	FA	386.292	385.283	[M+H]+	C21H39NO5	1.27983	0.000290301	0.655318	0.883218	0.0166813	0.657678	0.560996	0.490421	0.939903
Carnitine C16:1	FA	398.328	397.319	[M+H]+	C23H43NO4	1.27307	0.000166486	0.603768	1.04184	0.00322392	0.615242	1.23323	0.143309	0.845382
Carnitine C16:1-OH	FA	414.322	413.314	[M+H]+	C23H43NO5	1.06073	0.00165931	0.654449	1.07399	0.00223447	0.529111	1.38113	0.0831553	0.826322
Carnitine C18:1	FA	426.36	425.351	[M+H]+	C25H47NO4	1.21355	0.00033232	0.743663	0.973886	0.0149932	0.702067	0.944345	0.229413	0.930463
Carnitine C22:1	FA	482.419	481.413	[M+H]+	C29H55NO4	1.05515	0.00753183	0.685825	1.21593	0.000462347	0.549008	0.560654	0.506314	0.932261
Carnitine C18:1-OH	FA	442.355	441.345	[M+H]+	C25H47NO5	1.36738	7.81413e-06	0.505661	1.06483	0.00631509	0.559429	0.504103	0.579858	1.04537
Carnitine C10:2	FA	312.218	311.21	[M+H]+	C17H29NO4	0.46255	0.350829	1.12264	0.334029	0.463692	1.10085	0.442466	0.83164	1.02504
Carnitine C14:2	FA	368.281	367.272	[M+H]+	C21H37NO4	1.37274	0.000316831	0.643496	1.02506	0.00555554	0.632553	1.92205	0.0104269	0.776877
Carnitine C16:2	FA	396.313	395.304	[M+H]+	C23H41NO4	1.17622	0.000906497	0.633472	0.861413	0.045501	0.68265	1.45558	0.0540763	0.824209
Carnitine C18:2	FA	424.344	423.335	[M+H]+	C25H45NO4	0.948796	0.0114885	0.778856	0.695601	0.100388	0.791989	1.46975	0.0620971	0.861827
Carnitine C20:2	FA	452.374	451.366	[M+H]+	C27H49NO4	0.23892	0.610442	1.05084	0.148402	0.721358	0.964645	0.215396	0.924377	1.00919
Carnitine C18:2-OH	FA	440.339	439.33	[M+H]+	C25H45NO5	1.24935	0.000235286	0.575691	0.814623	0.0944263	0.727817	1.36722	0.0940515	0.842625
Cholesterol	SL	369.4	386.355	(M-H2O+H)+	C27H46O	1.01023	0.00714154	0.885661	0.498573	0.233828	0.959493	0.517025	0.51994	0.976773
CE(14:0)	SL	614.597	596.553	[M+NH4]+	C41H72O2	0.634096	0.156328	0.873372	0.465574	0.200947	0.910497	0.673173	0.430662	0.939441
CE(15:0)	SL	628.603	610.569	[M+NH4]+	C42H74O2	0.846387	0.0472022	0.850432	0.679692	0.090662	0.860262	0.165961	0.722171	0.975709
CE(16:0)	SL	642.628	624.585	[M+NH4]+	C43H76O2	0.136191	0.826437	0.98503	0.365257	0.330485	0.938491	1.46149	0.0446355	1.11613
CE(18:0)	SL	670.66	652.616	[M+NH4]+	C45H80O2	0.165523	0.612016	0.941277	0.191481	0.824891	0.959144	1.16391	0.252153	1.1221
CE(16:1)	SL	640.613	622.569	[M+NH4]+	C43H74O2	0.881096	0.0619254	0.834308	1.15025	0.00245737	0.735456	0.189164	0.781659	0.978824
CE(17:1)	SL	654.619	636.585	[M+NH4]+	C44H76O2	0.59432	0.254126	0.911602	0.31906	0.714283	0.950174	0.25326	0.852714	0.987998
CE(18:1)	SL	668.644	650.6	[M+NH4]+	C45H78O2	0.283925	0.368228	1.07314	0.0349348	0.69756	1.06857	1.76044	0.013897	1.1746
CE(19:1)	SL	682.7	664.616	[M+NH4]+	C46H80O2	0.316086	0.649392	1.08082	0.312031	0.383082	1.38517	0.235534	0.951358	1.01036
CE(20:1)	SL	696.675	678.631	[M+NH4]+	C47H82O2	0.43391	0.312301	0.869677	0.115376	0.827516	1.06417	0.880392	0.417797	1.10366
CE(22:1)	SL	724.707	706.663	[M+NH4]+	C49H86O2	0.258608	0.386076	1.08808	0.196791	0.352652	1.21729	0.0890453	0.908527	1.01323
CE(16:2)	SL	638.588	620.553	[M+NH4]+	C43H72O2	0.900506	0.0695147	0.765191	0.97905	0.0253141	0.703823	0.105822	0.919997	0.988357
CE(17:2)	SL	652.599	634.569	[M+NH4]+	C44H74O2	0.00632947	0.674296	1.04567	0.414531	0.202151	0.896764	0.474182	0.484608	0.941714
CE(18:2)	SL	666.628	648.585	[M+NH4]+	C45H76O2	0.295683	0.607967	0.961012	0.585651	0.0903227	0.905536	0.618371	0.430992	1.03855
CE(19:2)	SL	680.7	662.6	[M+NH4]+	C46H78O2	0.208296	0.493847	1.08547	0.015906	0.864864	1.03205	0.86351	0.304992	1.11812
CE(20:2)	SL	694.657	676.616	[M+NH4]+	C47H80O2	0.344138	0.205678	1.12753	0.431315	0.235103	1.45143	0.145802	0.807061	1.01635
CE(16:3)	SL	636.568	618.538	[M+NH4]+	C43H70O2	0.871626	0.0248122	1.32365	0.102207	0.75566	1.04319	0.13433	0.787867	0.97363
CE(18:3)	SL	664.613	646.569	[M+NH4]+	C45H74O2	0.420468	0.244132	1.12065	0.814792	0.0481092	0.79362	0.455885	0.551029	0.962057
CE(19:3)	SL	678.7	660.585	[M+NH4]+	C46H76O2	0.254042	0.852675	0.978178	0.0250839	0.822364	1.02478	0.806204	0.486418	0.914971
CE(20:3)	SL	692.644	674.6	[M+NH4]+	C47H78O2	0.921799	0.0036328	1.43928	0.262225	0.503529	1.0665	0.748658	0.362231	1.07167
CE(22:3)	SL	720.675	702.631	[M+NH4]+	C49H82O2	0.213491	0.452456	1.083	0.514199	0.250937	1.10673	0.194966	0.603175	1.0569
CE(18:4)	SL	662.585	644.553	[M+NH4]+	C45H72O2	1.16649	0.00133495	1.50572	0.316882	0.305338	1.1488	1.09755	0.202558	0.874649
CE(20:4)	SL	690.585	672.585	[M+NH4]+	C47H76O2	0.0262856	0.937003	1.00286	1.00301	0.00790297	0.903043	0.326041	0.80999	0.994136
CE(22:4)	SL	718.66	700.616	[M+NH4]+	C49H80O2	0.344055	0.183314	1.16586	0.0176246	0.96646	0.996167	0.653653	0.3527	1.06813
CE(20:5)	SL	688.613	670.569	[M+NH4]+	C47H74O2	0.317361	0.199893	1.17779	0.0871308	0.877088	1.01372	1.07724	0.164319	0.887094
CE(21:5)	SL	702.7	684.585	[M+NH4]+	C48H76O2	0.361075	0.304783	0.84519	0.508373	0.0924974	0.755147	0.787834	0.217002	0.823535
CE(22:5)	SL	716.644	698.6	[M+NH4]+	C49H78O2	0.254435	0.780377	0.971536	0.812793	0.0245738	0.816979	0.0255739	0.985663	0.99877
CE(24:5)	SL	744.7	712.616	[M+NH4]+	C50H80O2	0.823651	0.0435603	1.4233	0.666746	0.129608	1.8812	0.550881	0.434956	1.09555
CE(22:6)	SL	714.628	696.585	[M+NH4]+	C49H76O2	0.251477	0.610208	0.950043	0.80153	0.0211601	0.804763	0.426802	0.603953	1.03715
CE(24:6)	SL	742.7	724.616	[M+NH4]+	C51H80O2	0.36076	0.171454	1.25126	0.209847	0.425649	0.909807	0.323049	0.636678	0.949421
SPH(d16:1)	SL	272.259	271.251	[M+H]+	C16H33NO2	0.328153	0.308283	0.855341	0.262832	0.531447	0.900677	0.400806	0.886062	1.02281
SPH(d18:1)	SL	300.29	299.282	[M+H]+	C18H37NO2	0.296707	0.471645	1.08187	1.40243	7.13375e-06	0.461234	2.33948	0.00228075	0.677383
S1P(d18:1)	SL	380.257	379.249	[M+H]+	C18H38NO5P	1.21285	0.00184694	1.96946	0.535352	0.227661	1.45468	1.09244	0.243207	1.32645
Cer(d18:0/22:0)	SL	624.629	623.622	[M+H]+	C40H81NO3	0.30018	0.186049	0.726588	0.310343	0.244032	0.739569	0.733745	0.474682	1.17301
Cer(d18:0/24:1)	SL	650.6	649.637	[M+H]+	C42H83NO3	1.04402	0.0106766	0.611872	1.05464	0.00392025	0.532503	0.769256	0.377658	1.15831
Cer(d18:1/16:0)	SL	538.52	537.512	[M+H]+	C34H67NO3	1.42558	1.95821e-05	0.709952	1.41893	8.56622e-06	0.688229	0.211732	0.697049	1.02544
Cer(d18:1/17:0)	SL	552.536	551.528	[M+H]+	C35H69NO3	0.508594	0.285723	0.862695	0.906432	0.0146154	0.736018	0.19529	0.91248	1.01429
Cer(d18:1/18:0)	SL	566.551	565.543	[M+H]+	C36H71NO3	1.20269	0.00194748	0.71704	1.20873	0.000772038	0.630659	0.940226	0.229208	1.12154
Cer(d18:1/21:0)	SL	608.598	607.59	[M+H]+	C39H77NO3	1.02342	0.00956594	0.762156	1.21611	0.000785766	0.597318	0.562193	0.318465	1.13559
Cer(d18:1/22:0)	SL	622.614	621.606	[M+H]+	C40H79NO3	0.258512	0.662718	0.935133	0.787573	0.021336	0.684833	0.497593	0.587055	1.0674
Cer(d18:1/23:0)	SL	636.629	635.622	[M+H]+	C41H81NO3	0.686729	0.110386	0.861955	1.20218	0.000798475	0.713838	0.763879	0.268249	1.11793
Cer(d18:1/24:0)	SL	650.645	649.637	[M+H]+	C42H83NO3	0.464836	0.314846	0.884109	1.01425	0.00903946	0.723314	0.634875	0.422939	1.08664
Cer(d18:1/25:0)	SL	664.661	663.653	[M+H]+	C43H85NO3	0.770662	0.0670722	0.820345	1.11754	0.0045229	0.73395	1.07655	0.145126	1.23298
Cer(d18:1/26:0)	SL	678.676	677.669	[M+H]+	C44H87NO3	0.552777	0.128082	0.780269	0.894894	0.0121667	0.612371	0.806862	0.309962	0.851218
Cer(d18:1/16:1)	SL	536.504	535.496	[M+H]+	C34H65NO3	0.637222	0.108563	0.871794	0.682126	0.0806627	0.868075	1.27233	0.132696	0.8711
Cer(d18:1/22:1)	SL	620.598	619.59	[M+H]+	C40H77NO3	0.11736	0.763681	1.04256	0.754763	0.100458	0.796027	1.30493	0.110827	1.16657
Cer(d18:1/24:1)	SL	648.629	647.622	[M+H]+	C42H81NO3	1.02348	0.00582116	0.789226	1.34811	7.0502e-05	0.692643	0.823793	0.232781	1.10444
Cer(d16:1/24:0)	SL	622.6	621.606	[M+H]+	C40H79NO3	0.395801	0.528466	0.928836	0.817219	0.0507023	0.797035	0.786696	0.473616	0.913896
Cer(d18:2/20:0)	SL	592.6	591.559	[M+H]+	C38H73NO3	0.187319	0.700973	0.934199	0.816473	0.0249822	0.637395	0.181969	0.83746	0.96503
Cer(d18:2/22:0)	SL	620.6	619.59	[M+H]+	C40H77NO3	0.480555	0.230144	0.828913	0.901665	0.00643659	0.64047	0.407435	0.658353	1.05429
Cer(d18:2/23:0)	SL	634.6	633.606	[M+H]+	C41H79NO3	0.852344	0.0286261	0.772745	0.901353	0.013158	0.734781	0.155681	0.807226	1.02745
Cer(d18:2/24:0)	SL	648.6	647.622	[M+H]+	C42H81NO3	0.703624	0.063415	0.796076	1.19408	0.00102358	0.663845	0.127508	0.810382	0.977146
Cer(d18:2/24:1)	SL	646.6	645.606	[M+H]+	C42H79NO3	1.1565	0.00137791	0.701245	1.34424	0.000117555	0.622816	0.876592	0.22089	1.1191
CerP(d18:1/18:0)	SL	646.518	645.51	[M+H]+	C36H72NO6P	0.417514	0.416261	0.865323	0.783034	0.050764	0.730296	0.876319	0.39393	1.10498
Coenzyme Q8	PR	727.566	780.606	[M+H]+	C53H80O4	0.634189	0.113767	0.775711	0.992006	0.00711575	0.613846	1.24237	0.136208	1.20961
Coenzyme Q9	PR	795.629	794.621	[M+H]+	C54H82O4	0.379939	0.262795	0.846146	0.320154	0.360259	0.86361	0.783657	0.406072	1.12305
Coenzyme Q10	PR	863.691	862.684	[M+H]+	C59H90O4	0.806724	0.0541753	0.828966	0.53688	0.256924	0.86023	0.389521	0.678216	1.03235
DG(8:0_16:0)	GL	474.411	456.381	[M+NH4]+	C27H52O5	0.262482	0.644033	0.976631	0.0606228	0.767485	0.988881	0.332139	0.750576	1.01444
DG(12:0_14:0)	GL	502.445	484.413	[M+NH4]+	C29H56O5	0.0707011	0.925149	1.01585	0.646816	0.175075	1.21826	0.547585	0.882033	1.02137
DG(14:0_14:0)	GL	530.476	512.444	[M+NH4]+	C31H60O5	0.0513137	0.855257	0.970172	0.0195845	0.864499	0.975365	0.722746	0.360716	1.189
DG(12:0_16:0)	GL	530.476	512.444	[M+NH4]+	C31H60O5	0.50099	0.298789	0.858912	0.497258	0.275565	0.861195	1.65505	0.0419843	0.771322
DG(14:0_16:0)	GL	558.519	540.475	[M+NH4]+	C33H64O5	0.952117	0.0145737	0.843345	0.9684	0.0113628	0.833192	1.17566	0.110207	0.898833
DG(15:0_16:0)	GL	572.522	554.491	[M+NH4]+	C34H66O5	1.04608	0.00443622	0.727805	0.805674	0.0331169	0.844793	0.376136	0.721717	1.03003
DG(16:0_16:0)	GL	586.55	568.507	[M+NH4]+	C35H68O5	0.919289	0.0189415	0.898993	0.741222	0.049363	0.933486	1.52851	0.0642245	0.946103
DG(14:0_18:0)	GL	586.55	568.507	[M+NH4]+	C35H68O5	0.667965	0.107592	0.910803	0.480429	0.218677	0.936323	1.04687	0.196044	0.926864
DG(12:0_20:0)	GL	586.55	568.507	[M+NH4]+	C35H68O5	0.71485	0.0854752	0.916679	0.294777	0.448805	0.964635	0.698618	0.37863	0.966331
DG(17:0_16:0)	GL	600.554	582.522	[M+NH4]+	C36H70O5	0.718992	0.0653722	0.898921	0.364694	0.292424	0.942132	0.996282	0.230193	0.92949
DG(15:0_18:0)	GL	600.554	582.522	[M+NH4]+	C36H70O5	1.13029	0.005079	0.765623	1.00298	0.00737201	0.756137	1.82716	0.0175149	0.811817
DG(16:0_18:0)	GL	614.582	596.538	[M+NH4]+	C37H72O5	0.830085	0.0465397	0.888764	0.677764	0.079174	0.936949	1.75868	0.0316564	0.920747
DG(14:0_20:0)	GL	614.582	596.538	[M+NH4]+	C37H72O5	0.971733	0.0135058	0.857088	0.236903	0.521436	0.970145	1.27846	0.0996578	0.923152
DG(17:0_18:0)	GL	628.585	610.554	[M+NH4]+	C38H74O5	0.576901	0.193144	0.920418	0.431453	0.260736	0.935817	1.82041	0.0341214	0.875024
DG(18:0_18:0)	GL	642.613	624.569	[M+NH4]+	C39H76O5	0.798365	0.030591	0.879601	0.446942	0.231377	0.9405	1.67702	0.041849	0.904135
DG(16:0_20:0)	GL	642.613	624.569	[M+NH4]+	C39H76O5	0.904158	0.018208	0.84267	0.337657	0.373602	0.944958	1.46051	0.0625681	0.887594
DG(14:0_22:0)	GL	642.613	624.569	[M+NH4]+	C39H76O5	0.0831082	0.95693	0.996288	0.65869	0.104781	1.08883	0.569008	0.459918	0.966561
DG(19:0_18:0)	GL	656.614	638.585	[M+NH4]+	C40H78O5	0.094348	0.845551	0.985939	0.0311126	0.923368	0.993299	0.22758	0.88844	1.00939
DG(21:0_16:0)	GL	656.614	638.585	[M+NH4]+	C40H78O5	0.464644	0.291727	0.948448	0.684914	0.0960401	0.899003	1.726	0.0260462	0.867539
DG(20:0_18:0)	GL	670.639	652.601	[M+NH4]+	C41H80O5	0.607063	0.151443	0.9004	0.539415	0.155571	0.909132	0.740182	0.422922	0.946064
DG(14:0_16:1)	GL	556.503	538.46	[M+NH4]+	C33H62O5	0.674214	0.0715673	0.816782	0.769088	0.0445481	0.743429	2.56489	0.000974495	0.614386
DG(14:0_18:1)	GL	584.535	566.491	[M+NH4]+	C35H66O5	1.51679	9.46583e-05	0.372604	1.45999	0.000137606	0.395775	0.205729	0.71285	1.05652
DG(16:0_16:1)	GL	584.535	566.491	[M+NH4]+	C35H66O5	1.55181	7.26684e-05	0.610721	1.54654	1.13e-05	0.533293	0.345505	0.648138	0.959373
DG(15:0_18:1)	GL	598.534	580.507	[M+NH4]+	C36H68O5	1.01558	0.00466529	0.571561	1.02407	0.00196972	0.517847	0.374911	0.752012	0.944686
DG(16:0_18:1)	GL	612.566	594.522	[M+NH4]+	C37H70O5	1.66378	3.74314e-05	0.281633	1.55533	3.13014e-05	0.286377	0.720645	0.470596	1.09323
DG(16:0_20:1)	GL	640.597	622.554	[M+NH4]+	C39H74O5	1.64098	3.24299e-06	0.321307	1.46497	9.63978e-07	0.285902	0.0602684	0.968825	1.00566
DG(18:0_18:1)	GL	640.597	622.554	[M+NH4]+	C39H74O5	1.55503	0.000619322	0.344564	1.40967	0.00128753	0.410825	0.409658	0.674548	1.07543
DG(14:0_18:2)	GL	582.519	564.475	[M+NH4]+	C35H64O5	1.61897	0.000200989	0.141064	1.50501	0.000203708	0.149213	0.0217426	0.933833	0.984497
DG(16:1_16:1)	GL	582.519	564.475	[M+NH4]+	C35H64O5	0.34678	0.435303	0.943236	0.113462	0.961648	0.996165	2.30562	0.00216361	0.834379
DG(16:1_18:1)	GL	610.55	592.507	[M+NH4]+	C37H68O5	1.68916	1.13782e-05	0.333093	1.58335	5.5013e-06	0.316704	0.0668948	0.933941	1.01173
DG(16:0_18:2)	GL	610.55	592.507	[M+NH4]+	C37H68O5	1.65562	0.000280118	0.203361	1.56114	0.000274317	0.205275	0.723144	0.557818	1.10105
DG(18:0_18:2)	GL	638.582	620.538	[M+NH4]+	C39H72O5	1.60216	0.000464998	0.269772	1.52264	0.00044593	0.268419	0.635844	0.601516	1.09139
DG(18:1_18:1)	GL	638.582	620.538	[M+NH4]+	C39H72O5	1.65385	2.81576e-05	0.276415	1.48547	1.72129e-05	0.282241	1.01024	0.230609	1.17835
DG(18:1_20:1)	GL	666.613	648.569	[M+NH4]+	C41H76O5	1.61464	4.33826e-05	0.293881	1.37315	0.000164617	0.396239	0.0824247	0.916246	0.987452
DG(16:1_18:2)	GL	608.535	590.491	[M+NH4]+	C37H66O5	1.69902	0.000101562	0.144896	1.56816	9.61218e-05	0.153359	0.0555601	0.974996	0.993936
DG(16:0_18:3)	GL	608.535	590.491	[M+NH4]+	C37H66O5	1.57968	0.000141331	0.164687	1.51089	0.000158194	0.183038	0.168559	0.764401	0.945229
DG(17:1_18:2)	GL	622.544	604.507	[M+NH4]+	C38H68O5	1.40179	6.45853e-05	0.195604	1.33871	4.5358e-05	0.179089	0.441571	0.889998	0.971443
DG(18:1_18:2)	GL	636.566	618.522	[M+NH4]+	C39H70O5	1.62557	0.000194881	0.241051	1.51167	0.000148588	0.227198	0.967824	0.313099	1.17686
DG(18:2_20:1)	GL	664.597	646.554	[M+NH4]+	C41H74O5	1.65347	6.07138e-05	0.266551	1.50922	3.13091e-05	0.242218	0.626894	0.624076	1.06723
DG(16:1_18:3)	GL	606.519	588.475	[M+NH4]+	C37H64O5	1.66431	6.3071e-05	0.179507	1.49952	4.55309e-05	0.156844	0.287069	0.660771	1.09208
DG(16:0_20:4)	GL	634.55	616.507	[M+NH4]+	C39H68O5	1.58127	4.50689e-05	0.375295	1.46236	6.83627e-05	0.408891	1.17154	0.261519	1.12481
DG(18:2_18:2)	GL	634.55	616.507	[M+NH4]+	C39H68O5	1.58656	0.000432022	0.255803	1.48507	0.00035847	0.241359	0.921114	0.404355	1.1407
DG(18:0_20:4)	GL	662.582	644.538	[M+NH4]+	C41H72O5	1.1289	0.00377725	0.744662	1.32697	3.68533e-05	0.611845	0.561471	0.625589	0.963465
DG(18:2_18:3)	GL	632.535	614.491	[M+NH4]+	C39H66O5	1.58471	0.000870373	0.246138	1.52735	0.000521745	0.193715	0.763491	0.536525	1.11718
DG(16:1_20:4)	GL	632.535	614.491	[M+NH4]+	C39H66O5	1.56758	5.02455e-07	0.283633	1.46359	6.83066e-07	0.305741	0.507862	0.51971	0.926782
DG(16:0_20:5)	GL	632.519	614.491	[M+NH4]+	C39H66O5	1.388	0.00583144	0.297514	1.09282	0.0165784	0.42073	0.0792729	0.611664	0.894162
DG(18:1_20:4)	GL	660.566	642.522	[M+NH4]+	C41H70O5	1.61743	1.5445e-05	0.391067	1.3859	4.68502e-05	0.476126	0.597705	0.61116	1.04563
DG(18:1_22:4)	GL	688.597	670.554	[M+NH4]+	C43H74O5	1.41262	0.000358807	0.313094	1.0518	0.00922404	0.462938	0.889153	0.399625	1.12643
DG(18:2_20:4)	GL	658.55	640.507	[M+NH4]+	C41H68O5	1.55132	0.000242066	0.371727	1.27024	0.000632001	0.447778	0.495146	0.809322	1.02941
DG(18:1_20:5)	GL	658.55	640.507	[M+NH4]+	C41H68O5	1.40192	0.00330727	0.311022	1.22337	0.00459856	0.346965	0.020746	0.684213	0.923107
DG(16:0_22:6)	GL	658.55	640.507	[M+NH4]+	C41H68O5	1.64743	0.000381175	0.194719	1.51457	0.000542252	0.238665	0.796656	0.593325	1.08929
DG(16:1_22:5)	GL	658.537	640.507	[M+NH4]+	C41H68O5	1.54246	0.00138215	0.167215	1.35921	0.00193587	0.212035	0.813913	0.660635	1.09169
DG(18:2_22:4)	GL	686.582	668.538	[M+NH4]+	C43H72O5	1.32551	0.000543033	0.299102	1.18357	0.0018236	0.377536	0.32125	0.831571	1.03808
DG(16:1_22:6)	GL	656.52	638.491	[M+NH4]+	C41H66O5	1.6485	0.000354087	0.187819	1.48319	0.000432151	0.226285	0.308707	0.936443	1.01402
DG(18:1_22:6)	GL	684.561	666.522	[M+NH4]+	C43H70O5	1.35753	0.00334471	0.336665	1.21493	0.00573336	0.389724	0.915994	0.593478	1.09691
DG(18:2_22:6)	GL	682.539	664.507	[M+NH4]+	C43H68O5	1.22856	0.0138328	0.31151	1.05733	0.0211176	0.367859	0.579188	0.997313	1.00082
MG(14:0)	GL	320.289	302.246	[M+NH4]+	C17H34O4	1.16838	0.00102623	0.788889	0.549273	0.128644	0.922309	1.62198	0.06414	0.900206
MG(16:0)	GL	348.321	330.277	[M+NH4]+	C19H38O4	1.44964	5.25229e-06	0.85137	0.886258	0.0174479	0.941283	2.22271	0.00493506	0.928913
MG(17:0)	GL	362.321	344.293	[M+NH4]+	C20H40O4	1.42434	0.000102603	0.809381	1.23972	0.000186033	0.803358	1.90736	0.0196917	0.905518
MG(18:0)	GL	376.352	358.308	[M+NH4]+	C21H42O4	1.29018	0.000176756	0.85164	1.15627	0.00216949	0.901012	2.01492	0.0108319	0.914355
MG(20:0)	GL	404.372	386.34	[M+NH4]+	C23H46O4	1.13597	0.00386536	0.809276	0.263581	0.501102	0.958961	1.05446	0.181196	0.917134
MG(18:1)	GL	374.336	356.293	[M+NH4]+	C21H40O4	1.40793	0.0011632	0.389859	1.26856	0.00181581	0.417339	0.169531	0.825855	1.04301
MG(18:2)	GL	372.31	354.277	[M+NH4]+	C21H38O4	1.46444	0.000754899	0.315875	1.31641	0.00116555	0.352762	0.256577	0.74748	1.06753
HexCer(d18:1/16:0)	SL	700.573	699.565	[M+H]+	C40H77NO8	1.24559	0.00117805	0.770422	0.870156	0.0278907	0.838654	0.390235	0.722405	0.975111
HexCer(d18:1/17:0)	SL	714.588	713.581	[M+H]+	C41H79NO8	0.0241713	0.799609	1.0248	0.73667	0.0975215	0.83225	0.490703	0.377728	1.07487
HexCer(d18:1/18:0)	SL	728.604	727.596	[M+H]+	C42H81NO8	1.08094	0.00485186	0.704688	1.03927	0.00503287	0.67731	1.09963	0.185804	1.12872
HexCer(d18:1/20:0)	SL	756.635	755.628	[M+H]+	C44H85NO8	0.146086	0.919044	0.989234	0.553559	0.176102	0.865164	0.911531	0.219984	1.11067
HexCer(d18:1/22:0)	SL	784.667	783.659	[M+H]+	C46H89NO8	0.200785	0.665491	0.946833	0.570132	0.0629664	0.789995	0.223495	0.877054	1.01585
HexCer(d18:1/23:0)	SL	798.682	797.674	[M+H]+	C47H91NO8	0.587294	0.179505	0.907718	0.678494	0.0904354	0.883861	0.0122825	0.890038	1.00976
HexCer(d18:1/24:0)	SL	812.698	811.69	[M+H]+	C48H93NO8	0.0232086	0.876707	1.0162	0.671716	0.0726678	0.839158	0.570683	0.455361	0.936623
HexCer(d18:1/25:0)	SL	826.714	825.706	[M+H]+	C49H95NO8	0.79976	0.0416361	0.702304	0.199592	0.441528	0.899896	1.02063	0.171998	0.81389
HexCer(d18:1/16:1)	SL	698.557	697.549	[M+H]+	C40H75NO8	1.10052	0.00875818	1.29867	0.54018	0.149258	1.10556	1.23364	0.118933	1.08393
HexCer(d18:1/22:1)	SL	782.651	781.643	[M+H]+	C46H87NO8	0.593474	0.135573	1.23001	0.336661	0.406226	1.11372	0.0571314	0.73417	0.962806
HexCer(d18:1/24:1)	SL	810.682	809.674	[M+H]+	C48H91NO8	0.735715	0.117619	1.1707	0.120871	0.953064	1.00826	1.2606	0.149945	0.859195
HexCer(d18:2/16:0)	SL	698.6	697.549	[M+H]+	C40H75NO8	0.494488	0.16826	0.833888	0.60301	0.0635316	0.793239	1.22655	0.113256	1.17758
HexCer(d18:2/20:0)	SL	754.6	753.612	[M+H]+	C44H83NO8	0.24729	0.617256	0.917526	0.339289	0.403502	0.867598	1.27471	0.139212	1.2386
HexCer(d18:2/22:0)	SL	782.7	781.643	[M+H]+	C46H87NO8	0.0664548	0.806868	0.967431	0.155115	0.356856	0.88689	0.499459	0.651794	1.05189
HexCer(d18:2/24:0)	SL	810.7	809.674	[M+H]+	C48H91NO8	1.12675	0.00255073	0.668189	0.473258	0.203197	0.867349	0.323343	0.90683	0.985428
Hex2Cer(d18:1/16:0)	SL	862.6	861.618	[M+H]+	C46H87NO13	0.117994	0.859008	0.97408	0.695953	0.0836993	1.34745	0.770073	0.372542	0.869401
Hex2Cer(d18:2/16:0)	SL	860.6	859.602	[M+H]+	C46H85NO13	0.537773	0.109171	1.33251	0.836117	0.0610969	1.50079	0.103068	0.708475	0.960516
SHexCer(d18:1:/16:0(OH))	SL	796.8	795.517	[M+H]+	C40H77NO12S	1.23689	0.000977713	1.54814	0.537493	0.16056	1.24102	0.550132	0.612336	0.918161
SHexCer(d18:1:/16:0)	SL	780.8	779.522	[M+H]+	C40H77NO11S	0.806009	0.0400853	0.885767	0.884669	0.0188546	0.861251	0.422546	0.682039	0.971793
SHexCer (d18:1:/24:0(OH))	SL	908.8	907.642	[M+H]+	C48H93NO12S	0.193498	0.80397	0.957566	1.02897	0.00208966	0.486243	0.376864	0.804906	1.03564
SHexCer (d18:1:/24:0)	SL	892.8	891.647	[M+H]+	C48H93NO11S	1.16418	0.00145463	0.566619	1.3361	0.000133028	0.441822	0.81131	0.316556	1.13711
SHexCer(d18:1:/24:1)	SL	890.8	889.631	[M+H]+	C48H91NO11S	0.534772	0.178149	0.776666	1.18287	0.000982269	0.395917	0.54665	0.609228	1.08464
LPC(14:0/0:0)	GP	468.309	467.301	[M+H]+	C22H46NO7P	0.353598	0.445258	0.948502	1.10873	0.00285402	0.773955	1.29698	0.0948076	0.882104
LPC(0:0/15:0)	GP	482.322	481.317	[M+H]+	C23H48NO7P	1.02416	0.00735988	0.819462	1.42486	3.48472e-06	0.632817	1.96056	0.011454	0.871551
LPC(15:0/0:0)	GP	482.322	481.317	[M+H]+	C23H48NO7P	0.932333	0.0160446	0.839106	1.43969	3.05609e-06	0.63644	2.00896	0.00953003	0.86812
LPC(0:0/16:0)	GP	496.34	495.332	[M+H]+	C24H50NO7P	0.278716	0.643522	0.963722	1.39722	6.31807e-05	0.682557	1.18586	0.12643	0.91409
LPC(16:0/0:0)	GP	496.34	495.332	[M+H]+	C24H50NO7P	0.304207	0.546503	0.956846	1.35278	5.56182e-05	0.70101	0.468225	0.49342	0.965206
LPC(17:0/0:0)	GP	510.356	509.348	[M+H]+	C25H52NO7P	0.112926	0.720899	1.03105	1.25549	0.000788805	0.735261	1.25921	0.124917	0.892288
LPC(0:0/18:0)	GP	524.372	523.364	[M+H]+	C26H54NO7P	0.432038	0.163502	1.13936	1.01146	0.00568138	0.768466	1.40003	0.0811062	0.861589
LPC(0:0/19:0)	GP	538.388	537.379	[M+H]+	C27H56NO7P	0.129199	0.622486	1.03886	1.1008	0.00290995	0.769274	1.3867	0.0936226	0.870415
LPC(19:0/0:0)	GP	538.388	537.379	[M+H]+	C27H56NO7P	0.466583	0.193761	1.12045	0.869687	0.0290524	0.829722	1.2256	0.156109	0.880716
LPC(0:0/20:0)	GP	552.403	551.395	[M+H]+	C28H58NO7P	0.408611	0.0997561	1.24792	0.626053	0.213298	0.834287	1.6488	0.0458656	0.824788
LPC(20:0/0:0)	GP	552.403	551.395	[M+H]+	C28H58NO7P	0.818982	0.0067821	1.59616	0.151979	0.498512	1.12844	1.21531	0.141973	0.861682
LPC(22:0/0:0)	GP	580.434	579.426	[M+H]+	C30H62NO7P	0.0680382	0.919545	1.00743	0.923271	0.0178977	0.882001	0.717826	0.407147	0.963529
LPC(14:1/0:0)	GP	466.293	465.286	[M+H]+	C22H44NO7P	1.06695	0.00747908	0.657146	1.18784	0.0019289	0.609115	0.72219	0.304041	0.887019
LPC(16:1/0:0)	GP	494.325	493.317	[M+H]+	C24H48NO7P	1.26713	0.00114229	0.723855	1.49287	9.32914e-06	0.554019	1.91201	0.0142944	0.796899
LPC(17:1/0:0)	GP	508.339	507.332	[M+H]+	C25H50NO7P	0.322046	0.57794	0.949773	1.13578	0.000867941	0.714515	1.50373	0.0432876	0.854595
LPC(18:1/0:0)	GP	522.356	521.348	[M+H]+	C26H52NO7P	0.173349	0.828877	0.983111	1.0737	0.00277205	0.748472	0.79133	0.342505	0.939177
LPC(19:1/0:0)	GP	536.371	535.364	[M+H]+	C27H54NO7P	0.0462809	0.814897	1.01932	1.15338	0.00146547	0.742569	1.05275	0.219629	0.921942
LPC(0:0/20:1)	GP	550.387	549.379	[M+H]+	C28H56NO7P	0.476687	0.335695	0.920779	0.942605	0.0227968	0.788435	2.02114	0.0111373	0.841039
LPC(20:1/0:0)	GP	550.387	549.379	[M+H]+	C28H56NO7P	0.243411	0.349196	1.10373	0.823639	0.0464782	0.797906	1.26256	0.133716	0.869615
LPC(0:0/22:1)	GP	578.419	577.411	[M+H]+	C30H60NO7P	0.43532	0.376316	0.925177	0.932115	0.02479	0.78304	1.24735	0.177944	0.904186
LPC(22:1/0:0)	GP	578.419	577.411	[M+H]+	C30H60NO7P	0.198064	0.355926	1.09083	0.528263	0.336293	0.906023	1.47624	0.089615	0.90918
LPC(24:1/0:0)	GP	606.45	605.442	[M+H]+	C32H64NO7P	0.258293	0.672556	0.966661	0.428418	0.350043	0.929527	0.375997	0.580342	1.03176
LPC(0:0/18:2)	GP	520.34	519.332	[M+H]+	C26H50NO7P	0.452253	0.297392	0.914709	0.893286	0.0333588	0.802937	0.283269	0.842128	1.01492
LPC(18:2/0:0)	GP	520.34	519.332	[M+H]+	C26H50NO7P	0.208496	0.595209	0.970513	1.17388	0.00103804	0.763001	1.99128	0.012446	0.855349
LPC(0:0/20:2)	GP	548.372	547.364	[M+H]+	C28H54NO7P	0.0549043	0.839291	1.01943	0.0567705	0.580151	1.08964	1.2838	0.132253	0.895228
LPC(20:2/0:0)	GP	548.372	547.364	[M+H]+	C28H54NO7P	0.543481	0.0835709	1.23041	0.0497074	0.832234	1.03378	1.55575	0.0640708	0.829048
LPC(18:3/0:0)	GP	518.325	517.317	[M+H]+	C26H48NO7P	0.241175	0.543608	0.961885	1.36969	1.41113e-05	0.595732	1.21649	0.128649	0.912799
LPC(20:3/0:0)	GP	546.356	545.348	[M+H]+	C28H52NO7P	0.365356	0.255024	1.17749	0.0771576	0.669012	1.09157	0.308592	0.734069	0.969962
LPC(18:4/0:0)	GP	516.309	515.301	[M+H]+	C26H46NO7P	0.0343659	0.761214	1.0315	1.29872	8.75183e-05	0.572967	1.30239	0.128249	0.849974
LPC(0:0/22:4)	GP	572.372	571.364	[M+H]+	C30H54NO7P	0.0843078	0.944481	0.992943	0.290466	0.418606	1.08978	0.655844	0.423479	1.05879
LPC(22:4/0:0)	GP	572.372	571.364	[M+H]+	C30H54NO7P	1.29554	0.000958546	1.5384	0.0539567	0.894404	1.01519	1.35378	0.151969	0.889415
LPC(0:0/22:5)	GP	570.364	569.348	[M+H]+	C30H52NO7P	0.150069	0.793467	1.02295	1.06955	0.0058868	0.753106	0.188473	0.741764	0.97401
LPC(O-14:0)	GP	454.33	453.322	[M+H]+	C22H48NO6P	0.916766	0.0105559	1.27871	0.700667	0.0787606	0.871653	1.03179	0.201281	0.910576
LPC(O-16:0)	GP	482.361	481.353	[M+H]+	C24H52NO6P	0.62014	0.0693302	1.16972	0.835893	0.0260073	0.82296	1.35886	0.0949967	0.886894
LPC(O-18:0)	GP	510.392	509.385	[M+H]+	C26H56NO6P	0.982968	0.00386856	1.37628	0.426608	0.320805	0.916386	1.38803	0.0855345	0.887376
LPC(O-20:0)	GP	538.424	537.416	[M+H]+	C28H60NO6P	0.924817	0.016351	1.24643	0.267449	0.69064	0.970171	1.88045	0.0230505	0.883766
LPC(O-22:0)	GP	566.455	565.447	[M+H]+	C30H64NO6P	0.245993	0.39514	1.06814	0.560074	0.179374	0.895115	0.174483	0.805239	0.982081
LPC(O-16:1)	GP	480.345	479.338	[M+H]+	C24H50NO6P	0.0741699	0.978998	0.998022	0.696729	0.0697693	0.887934	0.739514	0.439257	0.958506
LPC(O-18:1)	GP	508.377	507.369	[M+H]+	C26H54NO6P	0.73601	0.0171477	1.35961	0.794805	0.0236458	0.736954	0.821259	0.223072	0.886168
LPC(O-20:1)	GP	536.408	535.4	[M+H]+	C28H58NO6P	0.99773	0.00324092	1.48129	0.332047	0.394019	0.903324	0.857523	0.246992	0.893154
LPC(O-22:1)	GP	564.439	563.431	[M+H]+	C30H62NO6P	0.23809	0.42105	1.10592	1.6925e-05	0.927188	1.01224	0.225431	0.76898	0.964027
LPC(O-18:2)	GP	506.361	505.353	[M+H]+	C26H52NO6P	0.791277	0.0113268	1.3625	0.828285	0.0213796	0.703192	1.43941	0.0555383	0.804369
LPC(O-20:2)	GP	534.392	533.385	[M+H]+	C28H56NO6P	0.720501	0.0223589	1.39862	0.630391	0.0568481	0.720994	1.1004	0.0854512	0.787192
LPC(O-22:2)	GP	562.424	561.416	[M+H]+	C30H60NO6P	0.3648	0.347096	1.14317	0.674175	0.0547038	0.717289	1.24262	0.0938767	0.785288
LPE(0:0/16:0)	GP	454.293	453.286	[M+H]+	C21H44NO7P	1.57206	1.31954e-06	0.701403	1.56596	4.97624e-08	0.594283	1.26039	0.0993463	0.932531
LPE(16:0/0:0)	GP	454.293	453.286	[M+H]+	C21H44NO7P	1.36184	0.00023143	0.680795	1.45723	1.43722e-05	0.579962	0.641382	0.417305	0.946981
LPE(0:0/18:0)	GP	482.325	481.317	[M+H]+	C23H48NO7P	1.14341	0.00263848	0.762631	1.50497	2.74707e-06	0.551642	0.827369	0.366766	0.938519
LPE(18:0/0:0)	GP	482.325	481.317	[M+H]+	C23H48NO7P	1.14485	0.00560471	0.717737	1.45511	0.00014305	0.548305	0.730599	0.372178	0.922631
LPE(20:0/0:0)	GP	510.356	509.348	[M+H]+	C25H52NO7P	0.128208	0.365926	1.14367	0.620658	0.403991	0.867973	0.746369	0.375343	0.936671
LPE(22:0/0:0)	GP	538.387	537.379	[M+H]+	C27H56NO7P	0.323525	0.471346	1.07402	0.778162	0.0697421	0.790201	0.245488	0.818138	1.02485
LPE(16:1/0:0)	GP	452.278	451.27	[M+H]+	C21H42NO7P	1.44724	5.61853e-05	0.59424	1.43855	1.85107e-06	0.448285	0.64544	0.541512	0.928123
LPE(0:0/20:1)	GP	508.34	507.332	[M+H]+	C25H50NO7P	1.31161	5.81907e-05	0.576527	1.19645	0.00122022	0.635323	0.00400988	0.925615	1.00969
LPE(20:1/0:0)	GP	508.34	507.332	[M+H]+	C25H50NO7P	0.822741	0.0450724	0.848272	1.33297	7.82664e-05	0.601939	0.991821	0.223083	0.941803
LPE(0:0/18:2)	GP	478.293	477.286	[M+H]+	C23H44NO7P	1.55239	3.99625e-06	0.432231	1.54932	3.19864e-06	0.414638	0.0590028	0.890508	1.01451
LPE(0:0/20:2)	GP	506.325	505.317	[M+H]+	C25H48NO7P	1.3236	6.52392e-05	0.456481	0.852896	0.042068	0.679606	0.545245	0.496489	1.07571
LPE(20:2/0:0)	GP	506.325	505.317	[M+H]+	C25H48NO7P	0.433817	0.448313	0.899518	1.04214	0.00791709	0.655502	0.206768	0.942493	0.989805
LPE(18:3/0:0)	GP	476.278	475.27	[M+H]+	C23H42NO7P	1.35784	0.000101755	0.621161	1.62542	1.59555e-10	0.3694	0.545979	0.769839	0.970045
LPE(0:0/20:3)	GP	504.309	503.301	[M+H]+	C25H46NO7P	0.512103	0.170332	0.802845	0.844958	0.0360129	0.705415	1.93137	0.0120774	1.32585
LPE(20:3/0:0)	GP	504.309	531.332	[M+H]+	C27H50NO7P	0.80071	0.0853224	0.815378	1.44266	1.45527e-05	0.521281	1.04971	0.267283	1.06832
LPE(20:4/0:0)	GP	502.293	501.286	[M+H]+	C25H44NO7P	1.27813	0.000429446	0.75387	1.64241	2.30994e-08	0.409863	0.299286	0.803381	0.983006
LPE(22:4/0:0)	GP	530.325	529.317	[M+H]+	C27H48NO7P	1.27837	0.000245138	0.603254	1.4517	7.15716e-06	0.541858	0.739313	0.332776	1.07633
LPE(20:5/0:0)	GP	500.278	499.27	[M+H]+	C25H42NO7P	1.31654	0.00051697	0.608797	1.49313	1.25122e-05	0.43645	1.19911	0.159879	0.878485
LPE(P-16:0)	GP	438.3	437.291	[M+H]+	C21H44NO6P	0.920224	0.0237273	0.791562	1.6109	1.51312e-05	0.481074	1.97185	0.0251388	0.797839
LPE(P-18:0)	GP	466.3	465.322	[M+H]+	C23H48NO6P	0.62366	0.123033	0.864821	1.52591	1.8691e-05	0.527152	1.68865	0.0394907	0.810899
LPE(P-20:0)	GP	494.3	493.353	[M+H]+	C25H52NO6P	0.830828	0.0327823	0.805462	1.28521	0.000219795	0.599512	1.42967	0.0617762	0.829552
LPE(P-18:1)	GP	464.3	463.306	[M+H]+	C23H46NO6P	0.830606	0.0386154	0.779817	1.49871	2.30524e-05	0.459639	1.84066	0.022462	0.772461
LPG(16:0/0:0)	GP	502.288	484.28	[M+NH4]+	C22H45O9P	1.11183	0.00392306	0.808168	1.64975	1.35458e-10	0.379206	0.71729	0.470903	0.955606
LPG(18:2/0:0)	GP	526.288	508.28	[M+NH4]+	C24H45O9P	1.44559	2.88471e-05	0.646667	1.66382	3.38014e-08	0.322852	1.12694	0.146347	1.08773
LPS(16:0/0:0)	GP	498.283	497.275	[M+H]+	C22H44NO9P	0.263859	0.597801	0.965205	1.38227	2.56883e-05	0.700178	0.545443	0.564569	0.972859
PC(14:0_14:0)	GP	678.507	677.5	[M+H]+	C36H72NO8P	0.548142	0.194747	0.90658	0.451234	0.228453	1.08507	0.396485	0.700827	1.02071
PC(16:0_14:0)	GP	706.539	705.531	[M+H]+	C38H76NO8P	0.802482	0.0728671	0.856496	0.279989	0.578448	1.03395	0.946274	0.291387	0.923256
PC(15:0_16:0)	GP	720.554	719.547	[M+H]+	C39H78NO8P	1.27123	0.00133454	0.780679	0.524633	0.20472	0.924029	0.189914	0.923509	0.995133
PC(16:0_18:0)	GP	762.601	761.593	[M+H]+	C42H84NO8P	0.669108	0.0549411	1.18368	0.396804	0.405035	0.938079	0.579839	0.433628	1.04017
PC(16:0_22:0)	GP	818.664	817.656	[M+H]+	C46H92NO8P	0.425615	0.218642	1.19935	0.00867154	0.838285	0.973583	0.175097	0.707441	0.954958
PC(16:0_24:0)	GP	846.695	845.687	[M+H]+	C48H96NO8P	0.0101197	0.893229	1.01182	0.70448	0.0793893	0.839841	0.313427	0.754622	0.969394
PC(14:0_16:1)	GP	704.523	703.515	[M+H]+	C38H74NO8P	1.25606	0.00162374	0.698825	0.806956	0.0419888	0.841374	0.752165	0.319356	0.925973
PC(15:0_16:1)	GP	718.539	717.531	[M+H]+	C39H76NO8P	1.53306	2.9001e-06	0.481654	1.05885	0.0036725	0.721544	0.708099	0.38938	0.922858
PC(16:0_16:1)	GP	732.554	731.547	[M+H]+	C40H78NO8P	1.3145	0.000259199	0.659954	0.949099	0.0142418	0.786986	0.153249	0.810713	0.979562
PC(16:0_18:1)	GP	760.586	759.578	[M+H]+	C42H82NO8P	0.8602	0.0335758	0.833473	1.29388	0.000126077	0.747273	1.6507	0.0255184	1.09274
PC(17:0_18:1)	GP	774.601	773.593	[M+H]+	C43H84NO8P	0.576595	0.27279	0.916446	0.835862	0.0615478	0.876679	1.09464	0.124795	1.05265
PC(18:0_18:1)	GP	788.617	787.609	[M+H]+	C44H86NO8P	0.370638	0.220838	1.13383	0.487134	0.303011	0.929255	1.13799	0.164418	1.07299
PC(16:0_22:1)	GP	816.648	815.64	[M+H]+	C46H90NO8P	0.692757	0.0336604	1.25258	0.00563625	0.816866	1.01983	1.36	0.172071	0.937471
PC(14:0_18:2)	GP	730.539	729.531	[M+H]+	C40H76NO8P	1.55612	3.99797e-06	0.554919	1.30035	0.00011008	0.637718	0.132659	0.846154	0.984695
PC(16:0_18:2)	GP	758.57	757.562	[M+H]+	C42H80NO8P	1.11448	0.00305884	0.822652	1.22854	0.00043181	0.799021	0.900264	0.282732	1.03838
PC(17:1_18:1)	GP	772.586	771.578	[M+H]+	C43H82NO8P	1.33449	7.5028e-05	0.774377	1.14148	0.00196923	0.82627	0.0995748	0.930926	0.996976
PC(18:0_18:2)	GP	786.601	785.593	[M+H]+	C44H84NO8P	0.260164	0.6174	0.973492	0.484685	0.294434	0.948221	0.0473792	0.970604	1.00169
PC(19:0_18:2)	GP	800.617	799.609	[M+H]+	C45H86NO8P	0.670401	0.0779704	0.895071	0.662624	0.181219	0.900468	0.931854	0.392807	0.927265
PC(18:0_20:2)	GP	814.633	813.625	[M+H]+	C46H88NO8P	1.36006	0.00036394	1.60942	0.982692	0.0235787	1.62453	0.304887	0.668527	1.02689
PC(18:1_22:1)	GP	842.664	841.656	[M+H]+	C48H92NO8P	0.207776	0.945325	0.993947	0.0573929	0.730121	1.05785	1.5223	0.0912302	0.909454
PC(14:0_18:3)	GP	728.523	727.515	[M+H]+	C40H74NO8P	1.46682	3.85264e-06	0.450741	1.18812	0.000729589	0.563516	1.16648	0.182283	0.853508
PC(16:0_18:3)	GP	756.554	755.547	[M+H]+	C42H78NO8P	1.49638	2.00132e-06	0.542077	1.37095	3.83314e-06	0.513344	0.488563	0.531779	0.957942
PC(17:1_18:2)	GP	770.57	769.562	[M+H]+	C43H80NO8P	1.1769	0.000690521	0.749671	0.994654	0.00927589	0.809279	0.628178	0.409446	0.961375
PC(16:0_20:3)	GP	784.586	783.578	[M+H]+	C44H82NO8P	0.758398	0.0865466	0.898816	0.47013	0.378745	0.92515	0.12645	0.953944	0.997837
PC(17:0_20:3)	GP	798.601	797.593	[M+H]+	C45H84NO8P	1.06247	0.00618503	1.4518	0.461056	0.184396	1.23059	0.010993	0.993994	0.999249
PC(18:2_22:1)	GP	840.648	839.64	[M+H]+	C48H90NO8P	1.19353	0.00216432	2.1886	0.794823	0.0833141	1.94155	0.0110443	0.981529	0.99834
PC(18:0_24:3)	GP	868.68	867.672	[M+H]+	C50H94NO8P	0.229003	0.829613	0.980604	0.23839	0.383051	1.16547	0.87151	0.292689	0.933863
PC(14:0_20:4)	GP	754.539	753.531	[M+H]+	C42H76NO8P	1.56786	7.02439e-07	0.574357	1.3458	4.19239e-05	0.621297	0.886501	0.262633	0.919908
PC(15:0_20:4)	GP	768.554	767.547	[M+H]+	C43H78NO8P	1.46389	7.02292e-06	0.658236	1.12483	0.00241995	0.78	0.15321	0.931324	1.00551
PC(16:0_20:4)	GP	782.57	781.562	[M+H]+	C44H80NO8P	1.2114	0.000903976	0.845314	1.0412	0.00570823	0.830455	0.901583	0.331096	1.03692
PC(20:4_17:0)	GP	796.57	793.562	[M+H]+	C45H80NO8P	0.684993	0.082907	0.864785	0.574888	0.166624	0.893462	0.164527	0.998805	0.999883
PC(18:0_20:4)	GP	810.601	809.593	[M+H]+	C46H84NO8P	0.665599	0.121141	1.10219	0.0542851	0.795318	1.01812	0.369107	0.721031	1.01837
PC(18:0_22:4)	GP	838.633	837.625	[M+H]+	C48H88NO8P	0.903111	0.0184032	1.28504	0.717219	0.0781959	1.12931	0.128775	0.944945	1.00454
PC(20:3_22:1)	GP	866.664	865.656	[M+H]+	C50H92NO8P	0.676292	0.0763094	1.23591	0.162662	0.70945	1.03934	0.0638846	0.87685	1.01452
PC(14:0_20:5)	GP	752.523	751.515	[M+H]+	C42H74NO8P	1.48649	6.56197e-05	0.518113	1.16849	0.00218215	0.631834	1.06835	0.179754	0.867941
PC(15:0_20:5)	GP	766.539	765.531	[M+H]+	C43H76NO8P	0.898989	0.0226214	0.718411	0.0255742	0.913633	1.01403	0.0972299	0.755024	0.966784
PC(16:0_20:5)	GP	780.554	779.547	[M+H]+	C44H78NO8P	0.852651	0.0567567	0.795503	0.0758921	0.777122	1.02763	0.136345	0.961328	1.00359
PC(17:1_20:4)	GP	794.57	793.562	[M+H]+	C45H80NO8P	0.966902	0.0210503	0.823552	0.282696	0.63622	0.963519	0.387919	0.627955	1.0293
PC(16:0_22:5)	GP	808.586	807.578	[M+H]+	C46H82NO8P	0.636162	0.15739	0.916946	0.88917	0.0206693	0.870815	0.814409	0.331482	0.948211
PC(18:0_22:5)	GP	836.617	835.609	[M+H]+	C48H86NO8P	0.373611	0.523443	0.945085	0.804601	0.0363577	0.887368	0.0837536	0.858049	0.992009
PC(24:1_20:4)	GP	892.68	891.672	[M+H]+	C52H94NO8P	0.523399	0.175742	1.13279	0.639902	0.100307	1.23984	0.750307	0.426394	1.0619
PC(14:0_22:6)	GP	778.539	777.531	[M+H]+	C44H76NO8P	1.35688	0.000123589	0.711796	1.07094	0.00362166	0.794759	0.79986	0.387117	1.05537
PC(15:1_22:5)	GP	792.554	791.547	[M+H]+	C45H78NO8P	1.36134	5.62868e-05	0.654898	1.21198	0.000553286	0.716288	0.0100404	0.917139	0.994044
PC(16:0_22:6)	GP	806.57	805.562	[M+H]+	C46H80NO8P	1.07711	0.00547425	0.82636	1.16197	0.0011833	0.810073	1.91737	0.0124833	1.11168
PC(22:6_17:0)	GP	820.586	819.578	[M+H]+	C47H82NO8P	0.498702	0.183074	0.932779	0.469628	0.211622	0.933334	0.649472	0.459743	1.03484
PC(18:0_22:6)	GP	834.601	833.593	[M+H]+	C48H84NO8P	0.0805938	0.879461	0.992618	0.361323	0.425555	0.957815	1.19146	0.129593	1.05647
PC(16:1_22:6)	GP	804.554	803.547	[M+H]+	C46H78NO8P	1.46724	1.85436e-05	0.595303	1.28792	4.60074e-05	0.627346	0.799702	0.356252	0.920778
PC(18:1_22:6)	GP	832.586	831.578	[M+H]+	C48H82NO8P	1.05468	0.00537886	0.825554	0.763327	0.0493698	0.879704	1.20341	0.134422	1.0731
PC(20:1_22:6)	GP	860.617	859.609	[M+H]+	C50H86NO8P	0.381972	0.370065	0.916424	0.295852	0.522201	0.939742	0.0766547	0.984377	1.00145
PC(20:4_20:4)	GP	830.57	829.562	[M+H]+	C48H80NO8P	0.611149	0.0473524	1.32821	0.574913	0.226189	1.1332	0.645993	0.500162	1.05924
PC(20:2_22:6)	GP	858.601	857.593	[M+H]+	C50H84NO8P	0.33505	0.387979	1.1005	0.608887	0.159068	1.25484	0.269197	0.863279	1.0172
PC(O-16:0_14:0)	GP	692.559	691.552	[M+H]+	C38H78NO7P	0.0499298	0.977921	1.00183	0.631037	0.210177	0.900486	0.66155	0.387212	0.955456
PC(O-16:0_16:0)	GP	720.591	719.583	[M+H]+	C40H82NO7P	1.11574	0.00260073	1.3347	0.0514693	0.972456	0.996592	0.61029	0.475027	0.952873
PC(O-18:0_16:0)	GP	748.622	747.614	[M+H]+	C42H86NO7P	1.13442	0.00635611	1.33265	0.850989	0.0230718	1.16745	0.844679	0.384731	0.971317
PC(O-16:0_22:0)	GP	804.685	803.677	[M+H]+	C46H94NO7P	0.241271	0.533368	1.07044	0.198719	0.497606	1.09478	0.0167123	0.944553	1.00707
PC(O-16:0_14:1)	GP	690.544	689.536	[M+H]+	C38H76NO7P	0.0988687	0.935048	0.994333	0.189578	0.617561	1.02905	1.3675	0.0564504	1.12599
PC(O-16:0_16:1)	GP	718.575	717.567	[M+H]+	C40H80NO7P	0.926056	0.0271245	1.1465	0.944426	0.0189283	1.21238	0.538267	0.523578	1.03168
PC(O-18:1_16:0)	GP	746.606	745.599	[M+H]+	C42H84NO7P	0.667847	0.0853228	1.15111	0.0504486	0.990397	0.999157	0.634385	0.475753	0.955419
PC(O-16:0_22:1)	GP	802.669	801.661	[M+H]+	C46H92NO7P	0.213624	0.375346	1.12855	0.241663	0.798001	0.961301	0.668013	0.490166	1.0773
PC(O-18:1_22:0)	GP	830.7	829.692	[M+H]+	C48H96NO7P	0.453511	0.192769	1.11027	0.594407	0.12473	1.11618	0.0928562	0.963188	1.00305
PC(O-16:0_18:2)	GP	744.591	743.583	[M+H]+	C42H82NO7P	0.952771	0.00941673	1.26996	0.587977	0.127509	1.17718	1.22743	0.152383	0.939018
PC(O-18:0_18:2)	GP	772.622	771.614	[M+H]+	C44H86NO7P	0.774317	0.055585	1.20027	0.284681	0.380148	0.920229	0.662479	0.396092	0.929651
PC(O-18:1_20:1)	GP	800.653	799.645	[M+H]+	C46H90NO7P	0.351009	0.285587	1.10455	0.109457	0.850588	1.01248	0.666339	0.514476	0.95432
PC(O-18:1_22:1)	GP	828.685	827.677	[M+H]+	C48H94NO7P	0.688781	0.116897	1.20778	0.429518	0.24928	1.1392	0.956517	0.217846	0.886587
PC(O-18:1_24:1)	GP	856.716	855.708	[M+H]+	C50H98NO7P	0.721393	0.0732238	1.25928	0.198591	0.731423	1.04094	1.37554	0.0963336	0.817878
PC(O-16:1_18:2)	GP	742.575	741.567	[M+H]+	C42H80NO7P	0.502098	0.11455	1.15204	0.8897	0.0304536	1.33872	1.10254	0.165529	1.06996
PC(O-18:1_18:2)	GP	770.606	769.599	[M+H]+	C44H84NO7P	0.783523	0.0339338	1.25979	0.135328	0.963864	0.994743	0.706402	0.454739	0.932649
PC(O-18:0_20:3)	GP	798.638	797.63	[M+H]+	C46H88NO7P	0.963671	0.00738768	1.30616	0.456497	0.173881	1.12122	0.591409	0.561933	0.96029
PC(O-14:0_20:4)	GP	740.559	739.552	[M+H]+	C42H78NO7P	0.667495	0.102161	1.138	0.531495	0.130608	1.18789	0.514324	0.555822	1.04115
PC(O-16:0_20:4)	GP	768.591	767.583	[M+H]+	C44H82NO7P	0.875251	0.0265304	1.23225	0.47352	0.26924	1.0975	0.0647193	0.863709	0.987401
PC(O-18:0_20:4)	GP	796.622	795.614	[M+H]+	C46H86NO7P	1.09805	0.00387391	1.26583	0.70179	0.0654468	1.17197	1.01327	0.222611	0.939737
PC(O-20:0_20:4)	GP	824.653	823.645	[M+H]+	C48H90NO7P	0.75068	0.0441623	1.31074	0.878965	0.0209346	1.31591	0.983173	0.198409	0.888489
PC(O-20:0_22:4)	GP	852.685	851.677	[M+H]+	C50H94NO7P	0.525077	0.304357	1.06949	0.210785	0.669935	1.03045	0.63509	0.430505	0.934608
PC(O-24:0_20:4)	GP	880.716	879.708	[M+H]+	C52H98NO7P	0.0398418	0.959065	1.00574	0.390602	0.56732	0.921681	0.20885	0.781079	0.971729
PC(O-16:1_20:4)	GP	766.575	765.567	[M+H]+	C44H80NO7P	0.538299	0.207015	0.930371	0.564888	0.131187	1.0896	1.22494	0.139095	1.06058
PC(O-18:1_20:4)	GP	794.606	793.599	[M+H]+	C46H84NO7P	0.642234	0.108675	1.13689	0.235702	0.639313	1.03761	0.362942	0.652423	0.967691
PC(O-20:1_20:4)	GP	822.638	821.63	[M+H]+	C48H88NO7P	0.0824492	0.639219	1.06342	0.132872	0.552938	1.05469	0.633239	0.505998	0.955696
PC(O-22:1_20:4)	GP	850.669	849.661	[M+H]+	C50H92NO7P	0.592482	0.121151	0.878013	0.50202	0.19249	0.901889	1.12418	0.141942	0.896215
PC(O-24:1_20:4)	GP	878.7	877.692	[M+H]+	C52H96NO7P	0.110847	0.843072	0.985369	0.252373	0.503219	0.95699	0.850443	0.366006	0.936936
PC(O-16:1_20:5)	GP	764.559	763.552	[M+H]+	C44H78NO7P	0.248456	0.863562	0.984394	0.799991	0.0405993	1.28653	0.835599	0.384732	0.953748
PC(O-18:2_20:4)	GP	792.591	791.583	[M+H]+	C46H82NO7P	0.688182	0.0860112	1.14138	0.21433	0.7513	1.01673	0.583412	0.458169	0.956388
PC(O-18:0_22:6)	GP	820.622	819.614	[M+H]+	C48H86NO7P	0.140097	0.667423	1.04149	0.373485	0.284378	0.918151	0.809447	0.325977	0.927062
PC(O-22:2_20:4)	GP	848.653	847.645	[M+H]+	C50H90NO7P	0.506703	0.309032	1.11433	0.419691	0.345331	1.13159	0.163975	0.687638	0.957524
PC(O-16:1_22:6)	GP	790.575	789.567	[M+H]+	C46H80NO7P	1.01654	0.00715767	1.15003	1.10989	0.00237783	1.19309	1.08706	0.159481	1.0647
PC(O-18:1_22:6)	GP	818.606	817.599	[M+H]+	C48H84NO7P	0.874558	0.0274758	1.2158	0.323057	0.54097	1.05365	0.663322	0.417191	0.940538
PE(16:0_16:0)	GP	692.523	691.515	[M+H]+	C37H74NO8P	1.18054	0.00191768	0.755339	1.24076	0.000238455	0.701027	0.708215	0.432353	1.06822
PE(16:0_18:0)	GP	720.554	719.547	[M+H]+	C39H78NO8P	1.28527	0.000887919	0.741486	1.35583	2.73723e-05	0.6166	1.07476	0.165468	1.0981
PE(16:1_16:0)	GP	690.507	689.5	[M+H]+	C37H72NO8P	1.38032	0.000191225	0.515003	0.816343	0.0271633	0.76391	0.58096	0.456358	1.10656
PE(16:0_18:1)	GP	718.539	717.531	[M+H]+	C39H76NO8P	1.6444	8.79599e-06	0.404801	1.12985	0.00190888	0.668778	1.13548	0.182533	1.13904
PE(20:1_16:0)	GP	746.57	745.562	[M+H]+	C41H80NO8P	1.5649	2.85716e-05	0.492676	1.01854	0.00875385	0.711933	1.24053	0.165666	1.14646
PE(16:1_17:1)	GP	702.507	701.5	[M+H]+	C38H72NO8P	1.48685	2.45031e-05	0.321306	1.00852	0.012829	0.622723	0.0708041	0.903343	0.982473
PE(18:1_16:1)	GP	716.523	715.515	[M+H]+	C39H74NO8P	1.68948	6.0791e-06	0.310335	1.34033	0.000191635	0.553287	0.807998	0.449609	1.07136
PE(17:1_18:1)	GP	730.539	729.531	[M+H]+	C40H76NO8P	1.64532	2.89614e-06	0.308407	1.1377	0.00113801	0.615549	0.944997	0.29372	1.11115
PE(18:1_18:1)	GP	744.554	743.547	[M+H]+	C41H78NO8P	1.5575	8.54607e-05	0.353262	1.33198	0.00105557	0.53281	1.14429	0.254422	1.14568
PE(19:0_18:2)	GP	758.57	757.562	[M+H]+	C42H80NO8P	1.64874	7.0726e-06	0.362442	1.36155	7.01123e-05	0.531327	0.280759	0.653125	1.06294
PE(16:1_18:2)	GP	714.507	713.5	[M+H]+	C39H72NO8P	1.65237	3.21137e-06	0.223387	1.34557	7.56933e-05	0.473685	0.362314	0.594662	0.938262
PE(17:1_18:2)	GP	728.523	727.515	[M+H]+	C40H74NO8P	1.41644	9.17383e-07	0.352165	0.784249	0.134674	0.762731	0.678721	0.341132	1.10434
PE(18:1_18:2)	GP	742.539	741.531	[M+H]+	C41H76NO8P	1.66308	1.79717e-05	0.272105	1.04852	0.0068567	0.608824	0.84211	0.45124	1.08626
PE(20:3_18:0)	GP	770.57	769.562	[M+H]+	C43H80NO8P	1.45149	0.000174555	0.488029	1.20707	0.002505	0.619336	1.25895	0.215862	1.13142
PE(18:2_18:2)	GP	740.523	739.515	[M+H]+	C41H74NO8P	1.59649	3.02608e-05	0.392071	0.874768	0.0246204	0.760358	0.987324	0.398523	1.07883
PE(17:0_20:4)	GP	754.539	753.531	[M+H]+	C42H76NO8P	1.59343	8.87894e-05	0.330169	1.05816	0.00642533	0.627173	1.0146	0.430428	1.09188
PE(20:4_18:0)	GP	768.554	767.547	[M+H]+	C43H78NO8P	1.60564	2.81668e-05	0.411873	1.12572	0.00344477	0.672136	1.48389	0.0971925	1.16338
PE(19:0_20:4)	GP	782.57	781.562	[M+H]+	C44H80NO8P	1.59842	0.000100818	0.351754	1.26965	0.00122968	0.543295	0.680272	0.482282	1.09681
PE(18:0_22:4)	GP	796.586	795.578	[M+H]+	C45H82NO8P	1.34989	0.00028047	0.627364	1.0849	0.00252146	0.713576	1.7477	0.0265158	1.20691
PE(16:1_20:4)	GP	738.507	737.5	[M+H]+	C41H72NO8P	1.52897	0.000348513	0.333079	1.02055	0.0215786	0.647621	0.480736	0.734545	1.04884
PE(18:1_20:4)	GP	766.539	765.531	[M+H]+	C43H76NO8P	1.42385	0.000266578	0.427951	0.424287	0.247027	0.839596	1.39739	0.131764	1.19063
PE(17:0_22:5)	GP	780.554	779.547	[M+H]+	C44H78NO8P	1.61769	1.94624e-05	0.320062	1.29039	0.000583376	0.555709	0.799504	0.501754	1.07293
PE(18:0_22:5)	GP	794.57	793.562	[M+H]+	C45H80NO8P	1.63022	3.6221e-05	0.336842	1.38386	0.000520755	0.524711	1.19975	0.202675	1.14626
PE(15:0_22:6)	GP	750.507	749.5	[M+H]+	C42H72NO8P	1.61954	1.15656e-05	0.283031	0.596337	0.183009	0.805771	1.53	0.067669	1.23289
PE(20:5_18:1)	GP	764.523	763.515	[M+H]+	C43H74NO8P	1.64772	1.84104e-05	0.29686	1.06918	0.00602066	0.643789	1.88796	0.0204217	1.28211
PE(17:0_22:6)	GP	778.539	777.531	[M+H]+	C44H76NO8P	1.64474	8.07292e-06	0.357096	1.09968	0.00153999	0.626356	1.95191	0.0192147	1.22819
PE(22:6_18:0)	GP	792.554	791.547	[M+H]+	C45H78NO8P	1.64671	4.95926e-05	0.303699	1.22925	0.000840606	0.506093	1.94942	0.0217049	1.29965
PE(19:0_22:6)	GP	806.57	805.562	[M+H]+	C46H80NO8P	1.70396	4.72403e-07	0.356315	1.31601	1.9088e-05	0.523869	1.68486	0.0378806	1.18721
PE(22:6_20:0)	GP	820.586	819.578	[M+H]+	C47H82NO8P	1.15493	0.00161969	0.507504	0.818623	0.0698187	0.700637	1.18722	0.144975	1.20889
PE(16:1_22:6)	GP	762.507	761.5	[M+H]+	C43H72NO8P	1.62119	6.94859e-05	0.313708	0.91518	0.0132697	0.663121	1.36855	0.160364	1.169
PE(17:1_22:6)	GP	776.523	775.515	[M+H]+	C44H74NO8P	1.40037	2.27077e-05	0.280347	0.183486	0.653155	0.928886	1.67988	0.0371903	1.26587
PE(22:6_18:1)	GP	790.539	789.531	[M+H]+	C45H76NO8P	1.648	2.01344e-05	0.311834	0.845814	0.026105	0.71954	2.07819	0.00806029	1.32182
PE(19:2_22:5)	GP	804.554	803.547	[M+H]+	C46H78NO8P	1.30452	7.15598e-06	0.335029	0.952971	0.0118899	0.62636	1.6325	0.029517	1.24932
PE(22:6_20:1)	GP	818.57	817.562	[M+H]+	C47H80NO8P	1.65159	1.61768e-05	0.297812	1.17771	0.00313653	0.608223	1.69593	0.0703363	1.1956
PE(22:6_18:2)	GP	788.523	787.515	[M+H]+	C45H74NO8P	0.581134	0.196844	0.834155	0.29525	0.417602	0.900693	1.60861	0.0657086	1.22228
PE(P-18:0_16:0)	GP	704.559	703.552	[M+H]+	C39H78NO7P	0.0794321	0.706016	1.04509	0.445578	0.539468	0.9158	0.0912196	0.91548	0.98941
PE(P-18:0_18:0)	GP	732.591	731.583	[M+H]+	C41H82NO7P	0.195352	0.540581	1.07138	0.352494	0.582451	0.938763	0.0653141	0.998945	0.999878
PE(P-18:0_20:0)	GP	760.622	759.614	[M+H]+	C43H86NO7P	0.20267	0.510712	1.07306	0.256971	0.75038	0.96646	0.134904	0.820593	0.981326
PE(P-20:0_20:0)	GP	788.653	787.645	[M+H]+	C45H90NO7P	0.197366	0.6072	1.06055	0.235625	0.745887	0.960351	0.335361	0.55621	0.941716
PE(P-16:0_18:1)	GP	702.544	701.536	[M+H]+	C39H76NO7P	0.905773	0.0165023	1.33	0.510576	0.120809	1.24997	1.69837	0.0388805	1.25749
PE(P-18:0_18:1)	GP	730.575	729.567	[M+H]+	C41H80NO7P	0.264773	0.389316	1.1459	0.234525	0.353674	1.17498	0.301426	0.820515	1.02467
PE(P-18:0_22:1)	GP	786.638	785.63	[M+H]+	C45H88NO7P	0.523506	0.148434	1.15504	0.149636	0.478685	1.07798	0.111745	0.947392	0.995609
PE(P-16:0_18:2)	GP	700.528	699.52	[M+H]+	C39H74NO7P	0.494058	0.124847	1.16959	0.549333	0.123251	1.18418	1.42616	0.0818925	1.18471
PE(P-18:1_18:1)	GP	728.559	727.552	[M+H]+	C41H78NO7P	0.503516	0.0790026	1.25342	0.706061	0.0707477	1.40621	0.742061	0.372896	1.07916
PE(P-18:1_20:1)	GP	756.591	755.583	[M+H]+	C43H82NO7P	0.454402	0.386392	0.900852	0.143883	0.865914	0.978732	0.121156	0.953375	1.00674
PE(P-18:0_22:2)	GP	784.622	783.614	[M+H]+	C45H86NO7P	0.311227	0.544172	0.927187	0.0232675	0.853816	1.02305	0.395299	0.477867	0.924725
PE(P-15:0_20:3)	GP	712.528	711.52	[M+H]+	C40H74NO7P	0.458841	0.218876	0.781949	0.450663	0.246229	0.791005	0.618891	0.352379	0.821394
PE(P-18:1_18:2)	GP	726.544	725.536	[M+H]+	C41H76NO7P	0.175634	0.582323	1.04395	0.342832	0.66088	0.958937	0.874561	0.297335	1.07842
PE(P-18:0_20:3)	GP	754.575	753.567	[M+H]+	C43H80NO7P	0.175239	0.772858	0.981358	0.345171	0.66593	0.961707	1.02111	0.240903	1.07014
PE(P-18:0_22:3)	GP	782.606	781.599	[M+H]+	C45H84NO7P	0.664064	0.150487	0.881324	0.309581	0.654159	0.952793	0.399621	0.65694	0.962764
PE(P-16:0_20:4)	GP	724.528	723.52	[M+H]+	C41H74NO7P	0.233785	0.668894	0.963373	0.58518	0.201498	0.902395	2.07462	0.00940172	1.16531
PE(P-18:0_20:4)	GP	752.559	751.552	[M+H]+	C43H78NO7P	0.108	0.658446	1.03497	0.273499	0.819058	0.976885	0.861517	0.345377	1.0544
PE(P-18:0_22:4)	GP	780.591	779.583	[M+H]+	C45H82NO7P	0.144686	0.860318	0.988533	0.189365	0.942425	0.993975	0.185958	0.85101	1.00863
PE(P-22:0_20:4)	GP	808.622	807.614	[M+H]+	C47H86NO7P	0.763223	0.0712074	1.19873	0.403498	0.222634	1.14874	0.580748	0.492988	1.09307
PE(P-18:1_20:4)	GP	750.544	749.536	[M+H]+	C43H76NO7P	0.148253	0.90049	0.987679	0.541757	0.337094	0.896519	0.922869	0.230238	1.09774
PE(P-17:0_22:5)	GP	764.559	763.552	[M+H]+	C44H78NO7P	0.457949	0.324568	1.14064	0.222044	0.640736	0.937098	0.232787	0.931274	1.01192
PE(P-18:0_22:5)	GP	778.575	777.567	[M+H]+	C45H80NO7P	0.126099	0.626846	1.04981	0.119258	0.840661	1.02248	0.359865	0.744414	1.02016
PE(P-16:0_22:6)	GP	748.528	747.52	[M+H]+	C43H74NO7P	0.197564	0.780118	0.975072	0.476505	0.323966	0.922005	1.30238	0.123649	1.09125
PE(P-18:0_22:6)	GP	776.559	775.552	[M+H]+	C45H78NO7P	0.115153	0.537983	1.05582	0.0674354	0.506258	1.06518	1.40739	0.0949685	1.07437
PE(P-20:0_22:6)	GP	804.591	803.583	[M+H]+	C47H82NO7P	0.236459	0.350806	1.09572	0.289777	0.174084	1.19565	1.4476	0.0782932	1.11204
PE(P-18:1_22:6)	GP	774.544	773.536	[M+H]+	C45H76NO7P	0.0248268	0.694918	1.04448	0.00182056	0.798511	1.02388	1.50897	0.0919614	1.11106
PE(P-20:2_20:6)	GP	772.528	771.52	[M+H]+	C45H74NO7P	0.388286	0.505719	0.922781	0.0531335	0.709426	1.04322	0.952457	0.256958	1.10919
PG(16:0_18:1)	GP	766.56	748.525	[M+NH4]+	C40H77O10P	1.41323	0.000442861	0.372982	0.952118	0.0162969	0.624942	0.930693	0.146272	0.795264
PG(18:0_18:1)	GP	794.591	776.557	[M+NH4]+	C42H81O10P	1.4805	2.18018e-06	0.311047	1.35475	6.40926e-05	0.486677	1.6536	0.034867	1.23959
PG(18:1_16:1)	GP	764.544	746.51	[M+NH4]+	C40H75O10P	1.53146	2.21213e-05	0.455897	0.906258	0.0372386	0.701432	0.952602	0.295782	1.10992
PG(18:1_18:1)	GP	792.575	774.541	[M+NH4]+	C42H79O10P	1.50549	0.000375346	0.449413	1.22375	0.00171778	0.53447	1.99518	0.023598	1.3085
PS(18:0_18:2)	GP	788.544	787.536	[M+H]+	C42H78NO10P	0.34265	0.452819	1.14139	0.52413	0.479355	0.840889	0.0907623	0.665803	0.936829
PS(16:0_20:4)	GP	784.513	783.505	[M+H]+	C42H74NO10P	0.129829	0.741614	1.05381	0.279948	0.179402	1.44288	1.39136	0.0873135	1.30463
PS(18:0_20:4)	GP	812.544	811.536	[M+H]+	C44H78NO10P	0.696489	0.0863883	1.29586	5.44636e-05	0.485357	1.17085	0.554125	0.562666	1.07365
PS(16:0_22:6)	GP	808.513	807.505	[M+H]+	C44H74NO10P	0.238568	0.818532	1.04271	0.508446	0.277224	1.23814	1.83897	0.022378	1.51858
PS(18:0_22:6)	GP	836.544	835.536	[M+H]+	C46H78NO10P	0.207297	0.751418	1.042	0.0775572	0.799291	1.0542	1.24232	0.115262	1.25901
PS(18:1_22:6)	GP	834.529	833.521	[M+H]+	C46H76NO10P	0.637186	0.114833	1.43726	0.745739	0.0621991	1.71619	1.18896	0.0994973	1.65212
SM(d18:0/12:0)	SL	649.528	648.521	[M+H]+	C35H73N2O6P	0.934844	0.0109585	0.759587	1.20201	0.000123113	0.638826	1.79582	0.0176357	0.810697
SM(d18:0/14:0)	SL	677.56	676.552	[M+H]+	C37H77N2O6P	0.113405	0.789685	0.977113	0.612064	0.172954	0.858093	0.0354342	0.807884	1.03353
SM(d18:0/16:0)	SL	705.591	704.583	[M+H]+	C39H81N2O6P	0.676955	0.0822866	1.37008	1.18119	0.00020566	1.70446	1.53465	0.0472114	1.30759
SM(d18:0/17:0)	SL	719.607	718.599	[M+H]+	C40H83N2O6P	0.265499	0.627499	1.04428	0.653458	0.106271	0.852588	1.11492	0.213554	0.900438
SM(d18:0/18:0)	SL	733.622	732.615	[M+H]+	C41H85N2O6P	0.200634	0.556237	1.0514	0.0629761	0.936872	1.00709	0.809191	0.283482	1.18367
SM(d18:0/22:0)	SL	789.685	788.677	[M+H]+	C45H93N2O6P	0.439787	0.12265	1.27372	0.184491	0.721861	0.949751	0.699016	0.381709	1.14669
SM(d18:1/12:0)	SL	647.513	646.505	[M+H]+	C35H71N2O6P	1.32466	0.000106944	0.658708	1.38505	2.78069e-05	0.619553	0.231327	0.701601	1.03111
SM(d18:1/14:0)	SL	675.544	674.536	[M+H]+	C37H75N2O6P	0.433262	0.321786	0.904432	0.406852	0.362649	0.903247	0.617996	0.490384	1.06327
SM(d18:1/15:0)	SL	689.56	688.552	[M+H]+	C38H77N2O6P	0.485199	0.344967	0.943547	0.109735	0.700639	1.02048	1.43093	0.0571195	1.11931
SM(d18:1/16:0)	SL	703.575	702.568	[M+H]+	C39H79N2O6P	0.726255	0.0555275	1.11758	0.866169	0.0265569	1.10631	1.80502	0.0144701	1.10895
SM(d18:1/17:0)	SL	717.591	716.583	[M+H]+	C40H81N2O6P	0.982125	0.0127469	1.12952	0.90843	0.0260348	1.17869	0.854485	0.276445	1.05081
SM(d18:1/18:0)	SL	731.607	730.599	[M+H]+	C41H83N2O6P	0.294649	0.498489	1.05585	0.103705	0.76582	1.0208	0.654519	0.366038	1.05936
SM(d18:1/19:0)	SL	745.622	744.615	[M+H]+	C42H85N2O6P	0.197477	0.705051	0.96806	0.0583182	0.870111	1.0127	1.3149	0.103851	1.10452
SM(d18:1/20:0)	SL	759.638	758.63	[M+H]+	C43H87N2O6P	0.626471	0.0388279	1.46877	0.450292	0.186538	1.22785	1.10847	0.0888335	1.25598
SM(d18:1/21:0)	SL	773.654	772.646	[M+H]+	C44H89N2O6P	0.476331	0.085208	1.27956	0.272834	0.390909	1.10832	0.374509	0.71092	1.03284
SM(d18:1/22:0)	SL	787.669	786.661	[M+H]+	C45H91N2O6P	0.622523	0.0240955	1.50293	0.197324	0.521303	1.094	0.39087	0.727338	1.042
SM(d18:1/23:0)	SL	801.685	800.677	[M+H]+	C46H93N2O6P	0.912334	0.0167919	1.28505	0.765197	0.0618016	1.17662	0.364077	0.648176	1.0331
SM(d18:1/24:0)	SL	815.701	814.693	[M+H]+	C47H95N2O6P	0.594476	0.0724646	1.33653	0.38556	0.463824	1.10652	0.195144	0.86278	1.02506
SM(d18:1/25:0)	SL	829.716	828.708	[M+H]+	C48H97N2O6P	0.177052	0.593891	1.05408	0.278586	0.569204	1.0466	0.645404	0.340863	1.07687
SM(d18:2/14:0)	SL	673.528	672.521	[M+H]+	C37H73N2O6P	0.951266	0.0141532	0.794499	0.841274	0.0246441	0.817664	0.960177	0.227862	1.09517
SM(d18:1/16:1)	SL	701.56	700.552	[M+H]+	C39H77N2O6P	0.149946	0.803473	0.975566	0.201418	0.416636	0.937907	1.18535	0.124243	1.13544
SM(d18:1/17:1)	SL	715.575	714.568	[M+H]+	C40H79N2O6P	0.42621	0.396986	0.945504	0.309751	0.582697	0.964412	1.39718	0.0709644	1.10532
SM(d18:1/18:1)	SL	729.591	728.583	[M+H]+	C41H81N2O6P	0.569698	0.167147	0.871195	0.352079	0.428249	0.924431	0.096798	0.98367	0.998256
SM(d18:1/20:1)	SL	757.622	756.615	[M+H]+	C43H85N2O6P	0.209433	0.373716	1.11187	0.19938	0.664107	1.03803	0.741866	0.356312	1.06983
SM(d18:1/21:1)	SL	771.638	770.63	[M+H]+	C44H87N2O6P	0.282379	0.279804	1.20551	0.0564218	0.744564	1.05962	0.386856	0.661223	1.06342
SM(d18:1/22:1)	SL	785.654	784.646	[M+H]+	C45H89N2O6P	0.433888	0.0810829	1.34076	0.539778	0.171967	1.18831	0.529261	0.633872	1.05322
SM(d18:1/23:1)	SL	799.669	798.661	[M+H]+	C46H91N2O6P	0.853315	0.0266859	1.23451	0.863055	0.0328851	1.24571	0.697005	0.411929	1.05701
SM(d18:1/24:1)	SL	813.685	812.677	[M+H]+	C47H93N2O6P	0.962877	0.00689456	1.34444	0.684209	0.106669	1.11917	1.08696	0.137813	1.11814
SM(d18:1/25:1)	SL	827.701	826.693	[M+H]+	C48H95N2O6P	1.18465	0.00701998	1.35249	1.10239	0.00398196	1.33884	1.38389	0.0724403	1.1188
SM(d18:1/26:1)	SL	841.716	840.708	[M+H]+	C49H97N2O6P	0.952357	0.011572	1.33698	0.793363	0.0458677	1.17658	1.40449	0.0678734	1.15651
SM(d18:2/18:1)	SL	727.575	726.568	[M+H]+	C41H79N2O6P	1.02386	0.00908659	0.78593	1.03643	0.00391895	0.683101	1.04059	0.235326	1.07235
SM(d18:2/20:1)	SL	755.607	754.599	[M+H]+	C43H83N2O6P	0.201028	0.538996	1.0507	1.22416	0.000453826	1.19359	0.924017	0.28298	1.05841
SM(d18:2/22:1)	SL	783.638	782.63	[M+H]+	C45H87N2O6P	0.744461	0.0266641	1.31069	0.802607	0.046544	1.23046	0.879825	0.283119	1.1068
SM(d18:2/23:1)	SL	797.654	796.646	[M+H]+	C46H89N2O6P	1.02921	0.0116539	1.25161	0.778793	0.042068	1.23036	0.972984	0.261107	0.939745
SM(d18:2/24:1)	SL	811.669	810.661	[M+H]+	C47H91N2O6P	0.609894	0.112325	1.14336	0.25469	0.629304	1.04929	1.35272	0.060807	1.17888
SM(d18:2/25:1)	SL	825.685	824.677	[M+H]+	C48H93N2O6P	0.504822	0.227089	1.10574	0.119451	0.89382	1.01194	0.324433	0.817378	1.01154
SM(d18:2/24:3)	SL	807.638	806.63	[M+H]+	C47H87N2O6P	0.585836	0.0513123	1.26363	0.755842	0.0527568	1.12951	0.807006	0.331674	1.06047
TG(10:0_16:0_12:0)	GL	684.613	666.58	[M+NH4]+	C41H78O6	0.281529	0.489831	0.937969	0.491992	0.225427	0.885274	0.871269	0.325436	0.908538
TG(13:0_14:0_16:0)	GL	754.688	736.658	[M+NH4]+	C46H88O6	1.04592	0.00423765	0.824126	1.11227	0.00209751	0.809395	0.247594	0.960155	1.00486
TG(14:0_14:0_16:0)	GL	768.708	750.674	[M+NH4]+	C47H90O6	1.62425	1.11084e-05	0.368184	1.5087	2.07711e-05	0.415729	0.279864	0.738228	0.956464
TG(12:0_16:0_16:0)	GL	768.707	750.674	[M+NH4]+	C47H90O6	1.48077	0.000111815	0.372932	1.39708	7.8772e-05	0.345747	1.23331	0.162459	1.21391
TG(14:0_15:0_16:0)	GL	782.717	764.689	[M+NH4]+	C48H92O6	1.19992	0.00200588	0.817768	1.26285	0.000534293	0.784727	0.513295	0.583514	0.962196
TG(14:0_16:0_16:0)	GL	796.739	778.705	[M+NH4]+	C49H94O6	1.61006	2.41891e-05	0.402956	1.59517	8.50918e-06	0.329029	0.309038	0.798023	1.03162
TG(15:0_16:0_16:0)	GL	810.752	792.721	[M+NH4]+	C50H96O6	1.35797	0.00411257	0.485399	1.43344	0.00149501	0.395571	0.229278	0.802693	1.05636
TG(16:0_16:0_16:0)	GL	824.771	806.736	[M+NH4]+	C51H98O6	1.67984	1.84817e-05	0.373886	1.61725	8.90001e-06	0.333644	1.17939	0.171033	1.20613
TG(14:0_16:0_18:0)	GL	824.771	806.736	[M+NH4]+	C51H98O6	1.42674	0.000210738	0.55611	1.55247	7.83252e-05	0.478841	0.626613	0.574085	1.06218
TG(15:0_16:0_17:0)	GL	824.763	806.736	[M+NH4]+	C51H98O6	0.974535	0.0155869	0.788044	1.14366	0.00438663	0.735812	0.242912	0.707806	0.961727
TG(16:0_16:0_17:0)	GL	838.786	820.752	[M+NH4]+	C52H100O6	1.47703	0.000725607	0.439644	1.57299	0.000224809	0.330461	0.327432	0.631234	1.10536
TG(15:0_16:0_18:0)	GL	838.784	820.752	[M+NH4]+	C52H100O6	1.50091	0.000188002	0.356945	1.6104	5.7527e-05	0.224252	0.28944	0.63951	1.10527
TG(16:0_16:0_18:0)	GL	852.802	834.768	[M+NH4]+	C53H102O6	1.5822	3.37925e-05	0.59229	1.54458	2.72931e-05	0.569442	1.05476	0.214178	1.11786
TG(15:0_17:0_18:0)	GL	852.796	834.768	[M+NH4]+	C53H102O6	0.826677	0.0506604	0.814043	1.36011	0.000160805	0.564005	0.350801	0.5913	0.944726
TG(16:0_17:0_18:0)	GL	866.815	848.783	[M+NH4]+	C54H104O6	1.53874	0.000510319	0.319408	1.60189	0.000185385	0.202855	0.952057	0.26919	1.29124
TG(14:0_18:0_20:0)	GL	880.833	862.799	[M+NH4]+	C55H106O6	1.55953	0.000483273	0.318212	1.58505	0.000206906	0.227662	1.17348	0.144141	1.35655
TG(16:0_18:0_18:0)	GL	880.833	862.799	[M+NH4]+	C55H106O6	1.22752	0.000909038	0.818158	1.06605	0.00328795	0.854461	0.204572	0.823695	1.01005
TG(15:0_18:0_20:0)	GL	894.843	876.815	[M+NH4]+	C56H108O6	1.50794	0.000443397	0.461817	1.61582	8.41845e-05	0.312173	0.639962	0.410363	1.15606
TG(17:0_18:0_18:0)	GL	894.85	876.815	[M+NH4]+	C56H108O6	0.784667	0.0848068	0.92381	1.19375	0.00114763	0.846258	0.165093	0.900793	1.00517
TG(16:0_18:0_19:0)	GL	894.848	876.815	[M+NH4]+	C56H108O6	1.45452	0.00351664	0.35248	1.37413	0.00223643	0.306905	0.955591	0.28956	1.38984
TG(18:0_18:0_18:0)	GL	908.865	890.83	[M+NH4]+	C57H110O6	1.12236	0.0024921	0.871569	0.808235	0.0316066	0.920167	0.369982	0.715254	0.984931
TG(16:0_18:0_20:0)	GL	908.861	890.83	[M+NH4]+	C57H110O6	1.43949	0.000619965	0.520935	1.50944	0.000259387	0.450147	0.840557	0.292503	1.18729
TG(16:0_18:0_22:0)	GL	936.896	918.862	[M+NH4]+	C59H114O6	1.39223	0.000727017	0.68112	1.31539	0.000706668	0.679549	0.135743	0.778599	1.03076
TG(12:0_14:0_16:1)	GL	738.66	720.627	[M+NH4]+	C45H84O6	1.19417	0.0053137	0.588593	0.90425	0.0094866	0.585054	0.155893	0.831662	0.970973
TG(12:0_16:0_16:1)	GL	766.692	748.658	[M+NH4]+	C47H88O6	1.57914	1.10329e-05	0.567776	1.49141	6.1e-06	0.555654	0.0419658	0.842096	1.02261
TG(10:0_16:0_18:1)	GL	766.692	748.658	[M+NH4]+	C47H88O6	1.65903	3.45668e-05	0.0872389	1.57698	2.56564e-05	0.0493548	0.712889	0.31114	1.24287
TG(12:0_14:0_18:1)	GL	766.692	748.658	[M+NH4]+	C47H88O6	1.53591	7.59452e-07	0.566627	1.56857	3.38086e-07	0.54252	0.117437	0.690033	1.0427
TG(14:0_15:0_16:1)	GL	780.71	762.674	[M+NH4]+	C48H90O6	0.714364	0.0812687	0.902284	0.89569	0.0191674	0.853979	0.507751	0.516942	1.04532
TG(12:0_16:0_18:1)	GL	794.724	776.689	[M+NH4]+	C49H92O6	1.65627	1.75433e-05	0.192749	1.58968	9.38581e-06	0.133649	0.279868	0.725219	1.05612
TG(14:0_16:0_16:1)	GL	794.724	776.689	[M+NH4]+	C49H92O6	1.57655	6.36103e-05	0.345416	1.54154	4.58451e-05	0.316575	0.265152	0.814494	1.0373
TG(15:0_16:0_16:1)	GL	808.737	790.705	[M+NH4]+	C50H94O6	1.41685	0.000834263	0.694835	1.41562	0.000247858	0.645639	0.225831	0.822274	1.02216
TG(14:0_15:0_18:1)	GL	808.736	790.705	[M+NH4]+	C50H94O6	1.31657	0.000633426	0.670277	1.3122	0.000675227	0.673547	0.0209818	0.899852	0.987724
TG(16:0_16:0_16:1)	GL	822.755	804.721	[M+NH4]+	C51H96O6	1.66866	1.3316e-05	0.20156	1.60445	8.15211e-06	0.163457	0.102382	0.863737	1.03039
TG(14:0_16:0_18:1)	GL	822.755	804.721	[M+NH4]+	C51H96O6	1.6523	1.32698e-05	0.232246	1.59206	6.64672e-06	0.177798	0.35435	0.638589	1.07829
TG(15:0_16:0_18:1)	GL	836.77	818.736	[M+NH4]+	C52H98O6	1.51305	0.000534716	0.301967	1.57589	0.000329729	0.238811	0.149632	0.782014	1.07081
TG(16:0_16:0_18:1)	GL	850.786	832.752	[M+NH4]+	C53H100O6	1.66665	2.51455e-05	0.227249	1.58738	1.29183e-05	0.182651	0.917075	0.248153	1.20863
TG(16:0_17:0_18:1)	GL	864.801	846.768	[M+NH4]+	C54H102O6	1.62006	7.18029e-05	0.288675	1.62704	3.45716e-05	0.20694	0.51991	0.474295	1.15932
TG(16:0_18:0_18:1)	GL	878.817	860.783	[M+NH4]+	C55H104O6	1.66833	5.16713e-05	0.259779	1.60674	2.45945e-05	0.195672	1.10264	0.200985	1.20637
TG(16:0_16:1_20:0)	GL	878.818	860.783	[M+NH4]+	C55H104O6	1.56932	0.000730634	0.238392	1.51154	0.000489945	0.197531	0.373739	0.643242	1.11341
TG(17:0_18:0_18:1)	GL	892.831	874.799	[M+NH4]+	C56H106O6	1.47231	0.000490884	0.37026	1.59634	0.000107256	0.207872	0.401485	0.573707	1.13583
TG(17:0_17:0_19:1)	GL	892.826	874.799	[M+NH4]+	C56H106O6	1.45345	0.00153022	0.350712	1.46553	0.000356462	0.199374	0.518435	0.497582	1.17584
TG(16:0_18:0_20:1)	GL	906.847	888.815	[M+NH4]+	C57H108O6	1.52254	0.00024375	0.271909	1.61388	6.77882e-05	0.121139	0.550338	0.472364	1.14354
TG(18:0_18:0_18:1)	GL	906.849	888.815	[M+NH4]+	C57H108O6	1.59315	0.0003087	0.343073	1.61106	8.21184e-05	0.210214	0.975749	0.28527	1.19095
TG(16:0_20:0_18:1)	GL	906.846	888.815	[M+NH4]+	C57H108O6	1.51864	0.000454825	0.333643	1.44269	0.000220365	0.279164	0.912357	0.305717	1.20852
TG(16:0_18:1_21:0)	GL	920.855	902.83	[M+NH4]+	C58H110O6	1.29581	0.00479164	0.248693	1.3359	0.00305388	0.190282	1.02719	0.330814	1.40885
TG(18:0_18:1_20:0)	GL	934.876	916.846	[M+NH4]+	C59H112O6	1.43776	0.000776974	0.263698	1.50473	0.000333547	0.164558	0.571487	0.406508	1.20624
TG(16:0_24:0_16:1)	GL	934.871	916.846	[M+NH4]+	C59H112O6	0.885567	0.033709	0.839255	0.708174	0.055467	0.842571	0.426902	0.543937	0.950361
TG(16:0_18:1_22:0)	GL	934.88	916.846	[M+NH4]+	C59H112O6	1.44692	0.00117778	0.376343	1.41244	0.000748504	0.338261	0.853063	0.279791	1.2996
TG(8:0_16:0_18:2)	GL	736.642	718.611	[M+NH4]+	C45H82O6	1.57686	0.000119719	0.106505	1.53391	7.83534e-05	0.0639915	0.330459	0.571236	1.15279
TG(10:0_16:0_18:2)	GL	764.672	746.642	[M+NH4]+	C47H86O6	1.63868	0.000102089	0.0928265	1.55148	8.56092e-05	0.0743222	0.64061	0.492954	1.14437
TG(12:0_14:0_18:2)	GL	764.676	746.642	[M+NH4]+	C47H86O6	1.59989	0.000131425	0.348653	1.52513	0.000110442	0.342499	0.557552	0.476988	0.897217
TG(14:0_14:1_16:1)	GL	764.673	746.642	[M+NH4]+	C47H86O6	1.37724	0.000144683	0.653572	1.22004	0.000742791	0.731278	0.1158	0.962022	1.00436
TG(12:0_16:0_18:2)	GL	792.707	774.674	[M+NH4]+	C49H90O6	1.69869	7.67648e-05	0.0905815	1.60754	6.1123e-05	0.0716962	0.551683	0.49242	1.14671
TG(14:0_14:1_18:1)	GL	792.708	774.674	[M+NH4]+	C49H90O6	1.65269	3.3537e-05	0.199283	1.58406	2.65913e-05	0.18898	0.598186	0.458575	1.14124
TG(14:1_16:0_16:1)	GL	792.708	774.674	[M+NH4]+	C49H90O6	1.55311	5.66716e-05	0.348896	1.55565	2.87515e-05	0.292032	0.0262755	0.98464	1.00337
TG(15:0_16:1_16:1)	GL	806.724	788.689	[M+NH4]+	C50H92O6	0.798036	0.0596305	0.900838	0.955436	0.0113283	0.853345	0.23032	0.806523	1.01352
TG(14:0_16:1_17:1)	GL	806.722	788.689	[M+NH4]+	C50H92O6	1.09464	0.0103125	0.671054	1.13075	0.00106877	0.518616	0.225902	0.913962	0.988659
TG(14:0_15:0_18:2)	GL	806.722	788.689	[M+NH4]+	C50H92O6	1.49968	0.000286775	0.238243	1.53889	0.000100985	0.111881	0.217317	0.894472	1.02771
TG(16:0_16:1_16:1)	GL	820.739	802.705	[M+NH4]+	C51H94O6	1.66554	1.78009e-05	0.166143	1.59822	1.05e-05	0.123435	0.274899	0.676023	1.07941
TG(14:0_16:0_18:2)	GL	820.739	802.705	[M+NH4]+	C51H94O6	1.6655	1.64848e-05	0.163051	1.59639	8.6248e-06	0.109225	0.448605	0.578493	1.09973
TG(14:0_16:1_18:1)	GL	820.739	802.705	[M+NH4]+	C51H94O6	1.66533	1.76015e-05	0.158894	1.58737	1.04611e-05	0.113099	0.418502	0.565167	1.10965
TG(16:0_16:1_17:1)	GL	834.755	816.721	[M+NH4]+	C52H96O6	1.59399	1.97722e-06	0.457976	1.52001	4.79367e-07	0.400441	0.81395	0.291152	1.13289
TG(15:0_16:0_18:2)	GL	834.755	816.721	[M+NH4]+	C52H96O6	1.54841	0.000429585	0.196012	1.58616	0.000252609	0.124601	0.267604	0.731577	1.09845
TG(15:0_16:1_18:1)	GL	834.755	816.721	[M+NH4]+	C52H96O6	1.58771	0.000324837	0.203619	1.60865	0.000193842	0.137793	0.158162	0.791736	1.07248
TG(16:0_16:1_18:1)	GL	848.771	830.736	[M+NH4]+	C53H98O6	1.65357	2.06371e-05	0.183259	1.55089	1.10554e-05	0.143479	0.429768	0.485392	1.16589
TG(14:0_18:0_18:2)	GL	848.771	830.736	[M+NH4]+	C53H98O6	1.61408	1.4068e-05	0.179079	1.53152	9.59517e-06	0.14567	0.592656	0.412007	1.14865
TG(16:0_17:1_18:1)	GL	862.785	844.752	[M+NH4]+	C54H100O6	1.62729	1.8339e-05	0.307984	1.56021	7.24993e-06	0.248123	0.544605	0.408864	1.16686
TG(15:0_17:0_19:2)	GL	862.785	844.752	[M+NH4]+	C54H100O6	1.54579	0.000129735	0.277578	1.58452	7.42049e-05	0.200445	0.444829	0.573199	1.13105
TG(16:0_18:1_18:1)	GL	876.802	858.768	[M+NH4]+	C55H102O6	1.63166	2.19196e-05	0.301542	1.50119	5.21277e-06	0.237171	1.39747	0.0785627	1.28336
TG(14:0_18:0_20:2)	GL	876.802	858.768	[M+NH4]+	C55H102O6	1.60537	0.000117356	0.314571	1.55118	7.43294e-05	0.27911	0.166964	0.639584	0.932672
TG(16:0_18:0_18:2)	GL	876.79	858.768	[M+NH4]+	C55H102O6	1.65923	5.83603e-05	0.26303	1.59652	2.38969e-05	0.190097	1.1186	0.230622	1.17658
TG(16:0_16:1_20:1)	GL	876.802	858.768	[M+NH4]+	C55H102O6	1.66147	4.05115e-05	0.246252	1.56557	1.98362e-05	0.199443	0.237679	0.746236	1.05584
TG(17:0_18:1_18:1)	GL	890.786	872.783	[M+NH4]+	C56H104O6	1.63421	8.42336e-06	0.306984	1.56559	2.83285e-06	0.25073	1.00148	0.202083	1.23193
TG(16:0_18:1_19:1)	GL	890.816	872.783	[M+NH4]+	C56H104O6	1.64691	3.19998e-05	0.256529	1.58622	1.65376e-05	0.19943	1.14174	0.157842	1.30656
TG(16:0_18:1_20:1)	GL	904.836	886.799	[M+NH4]+	C57H106O6	1.63813	4.19982e-05	0.282101	1.49608	1.73212e-05	0.236279	0.913783	0.286588	1.17277
TG(16:1_18:0_20:1)	GL	904.812	886.799	[M+NH4]+	C57H106O6	1.64833	1.79586e-05	0.279684	1.49402	6.45165e-06	0.238859	0.910074	0.259736	1.17667
TG(18:0_18:1_18:1)	GL	904.833	886.799	[M+NH4]+	C57H106O6	1.66655	1.37575e-05	0.303071	1.50736	3.89022e-06	0.273192	0.938646	0.247495	1.16022
TG(16:0_16:1_22:1)	GL	904.833	886.799	[M+NH4]+	C57H106O6	1.52655	0.000259773	0.276525	1.48567	9.28879e-05	0.173461	0.385882	0.543737	1.13716
TG(15:0_18:1_22:1)	GL	918.842	900.815	[M+NH4]+	C58H108O6	1.57454	0.000177151	0.310817	1.54217	5.63139e-05	0.20992	0.788874	0.312958	1.23881
TG(18:0_18:1_19:1)	GL	918.846	900.815	[M+NH4]+	C58H108O6	1.44294	6.37651e-05	0.325027	1.51772	1.06751e-05	0.175867	0.0760169	0.859879	1.03675
TG(16:0_18:1_21:1)	GL	918.846	900.815	[M+NH4]+	C58H108O6	1.50315	0.00150798	0.242567	1.51977	0.000884926	0.176438	0.798568	0.327231	1.34972
TG(18:0_18:1_20:1)	GL	932.866	914.83	[M+NH4]+	C59H110O6	1.53449	3.37781e-05	0.240452	1.46587	1.16759e-05	0.174547	0.254481	0.584507	1.10837
TG(18:0_18:2_20:0)	GL	932.865	914.83	[M+NH4]+	C59H110O6	1.53907	0.000514544	0.34489	1.43293	0.000233104	0.288499	0.966118	0.319386	1.1859
TG(16:0_18:1_22:1)	GL	932.86	914.83	[M+NH4]+	C59H110O6	1.53529	0.00025809	0.278987	1.44221	0.000147512	0.232231	0.805048	0.337165	1.21261
TG(16:0_18:1_24:1)	GL	960.886	942.862	[M+NH4]+	C61H114O6	1.60194	2.49093e-05	0.221555	1.42924	9.89252e-06	0.187943	0.344167	0.42938	1.17112
TG(14:1_14:1_16:1)	GL	762.656	744.627	[M+NH4]+	C47H84O6	1.69131	1.81739e-05	0.242272	1.58407	1.71041e-05	0.262582	0.725299	0.644858	0.909677
TG(8:0_18:1_18:2)	GL	762.657	744.627	[M+NH4]+	C47H84O6	1.60418	8.15417e-05	0.0629237	1.53635	7.16525e-05	0.0559712	0.554128	0.589164	1.12056
TG(10:0_16:0_18:3)	GL	762.659	744.627	[M+NH4]+	C47H84O6	1.62857	9.53837e-05	0.0969834	1.54996	6.75001e-05	0.0581918	0.723829	0.355518	1.21846
TG(14:1_16:1_16:1)	GL	790.688	772.658	[M+NH4]+	C49H88O6	1.6052	0.000190518	0.314431	1.56871	9.89156e-05	0.258767	0.215914	0.751994	1.06021
TG(12:0_16:1_18:2)	GL	790.695	772.658	[M+NH4]+	C49H88O6	1.67609	0.000123275	0.115281	1.60295	8.45409e-05	0.0778142	0.312667	0.684749	1.08983
TG(10:0_18:1_18:2)	GL	790.69	772.658	[M+NH4]+	C49H88O6	1.63645	0.000218176	0.0812154	1.60918	0.000210369	0.0760155	0.291151	0.78795	1.05832
TG(14:1_16:1_18:1)	GL	818.724	800.689	[M+NH4]+	C51H92O6	1.64583	7.35213e-05	0.190181	1.59344	5.80776e-05	0.166209	0.0597818	0.832256	1.0485
TG(14:0_16:1_18:2)	GL	818.724	800.689	[M+NH4]+	C51H92O6	1.67262	4.04637e-05	0.116663	1.60277	2.88437e-05	0.0767643	0.125213	0.660368	1.11117
TG(16:0_14:1_18:2)	GL	818.72	800.689	[M+NH4]+	C51H92O6	1.66553	2.59635e-05	0.115408	1.58859	1.82609e-05	0.0822005	0.237929	0.694504	1.08063
TG(16:1_16:1_17:1)	GL	832.737	814.705	[M+NH4]+	C52H94O6	1.62703	6.35044e-05	0.33589	1.56909	3.13751e-05	0.287718	0.00632954	0.821396	1.04685
TG(15:0_16:1_18:2)	GL	832.737	814.705	[M+NH4]+	C52H94O6	1.62489	5.36786e-05	0.250881	1.60496	2.86617e-05	0.189593	0.335954	0.599605	1.11853
TG(14:0_17:1_18:2)	GL	832.737	814.705	[M+NH4]+	C52H94O6	1.6035	4.39032e-05	0.225951	1.56091	1.65703e-05	0.119699	0.212636	0.66884	1.09598
TG(16:1_16:1_18:1)	GL	846.753	828.721	[M+NH4]+	C53H96O6	1.68197	9.40349e-06	0.179255	1.58934	4.47132e-06	0.131545	0.353861	0.558662	1.10921
TG(16:0_16:1_18:2)	GL	846.755	828.721	[M+NH4]+	C53H96O6	1.67857	7.90322e-06	0.18684	1.58426	3.24425e-06	0.13167	0.248617	0.612425	1.09931
TG(16:1_17:1_18:1)	GL	860.767	842.736	[M+NH4]+	C54H98O6	1.68297	6.35575e-06	0.248873	1.60361	2.63717e-06	0.207729	0.31421	0.533295	1.12865
TG(15:0_18:1_18:2)	GL	860.77	842.736	[M+NH4]+	C54H98O6	1.58894	4.12552e-05	0.210643	1.56381	2.4047e-05	0.141453	0.629161	0.433482	1.17537
TG(16:0_17:1_18:2)	GL	860.773	842.736	[M+NH4]+	C54H98O6	1.67102	2.32456e-05	0.184476	1.58003	1.18836e-05	0.131312	0.869083	0.241209	1.27688
TG(16:1_18:1_18:1)	GL	874.785	856.752	[M+NH4]+	C55H100O6	1.6876	9.87733e-06	0.18183	1.56958	4.57187e-06	0.14174	0.197244	0.680275	1.07666
TG(16:0_18:1_18:2)	GL	874.786	856.752	[M+NH4]+	C55H100O6	1.62766	1.07387e-05	0.343138	1.53245	1.40209e-06	0.237207	1.45244	0.0645187	1.26709
TG(14:0_18:1_20:2)	GL	874.786	856.752	[M+NH4]+	C55H100O6	1.61434	7.19071e-05	0.2432	1.54159	3.39752e-05	0.174161	0.458889	0.826156	1.0316
TG(17:0_18:1_18:2)	GL	888.803	870.768	[M+NH4]+	C56H102O6	1.64642	1.87247e-05	0.254037	1.54522	6.03032e-06	0.193457	0.962986	0.24066	1.21231
TG(17:1_18:1_18:1)	GL	888.802	870.768	[M+NH4]+	C56H102O6	1.68986	1.30365e-05	0.24042	1.54365	4.57668e-06	0.230518	0.663418	0.348954	1.16949
TG(18:1_18:1_18:1)	GL	902.818	884.783	[M+NH4]+	C57H104O6	1.66927	2.26913e-05	0.257887	1.50374	6.51185e-06	0.231235	0.740125	0.389349	1.12432
TG(18:0_18:1_18:2)	GL	902.818	884.783	[M+NH4]+	C57H104O6	1.6775	1.88213e-05	0.292253	1.53128	4.36794e-06	0.235742	1.00127	0.254019	1.1487
TG(16:0_18:1_20:2)	GL	902.823	884.783	[M+NH4]+	C57H104O6	1.67759	4.60611e-05	0.270458	1.54416	1.67046e-05	0.213205	0.98926	0.284045	1.15897
TG(17:1_18:1_20:1)	GL	916.827	898.799	[M+NH4]+	C58H106O6	1.39466	0.000129738	0.297339	1.5109	5.491e-05	0.215722	0.624451	0.43326	1.16958
TG(18:1_18:1_19:1)	GL	916.819	898.799	[M+NH4]+	C58H106O6	1.66387	6.23281e-06	0.274051	1.49333	1.40707e-06	0.248561	0.732647	0.30476	1.1762
TG(18:1_18:2_20:0)	GL	930.849	912.815	[M+NH4]+	C59H108O6	1.65555	2.80811e-05	0.299134	1.40705	1.9761e-05	0.303918	0.545171	0.523989	1.09425
TG(18:1_18:1_20:1)	GL	930.848	912.815	[M+NH4]+	C59H108O6	1.66422	3.09081e-05	0.284217	1.45	1.15483e-05	0.255676	0.600612	0.493188	1.10052
TG(16:1_18:1_22:1)	GL	930.842	912.815	[M+NH4]+	C59H108O6	1.58841	0.000284522	0.25313	1.54214	0.000144732	0.186671	1.08337	0.216538	1.26193
TG(20:1_18:2_18:0)	GL	930.842	912.815	[M+NH4]+	C59H108O6	1.60784	0.000109849	0.270139	1.57063	3.46865e-05	0.160769	0.660458	0.508013	1.10688
TG(21:0_18:1_18:2)	GL	944.864	926.83	[M+NH4]+	C60H110O6	1.55907	0.000627651	0.21727	1.56242	0.000277685	0.117334	0.399358	0.537142	1.20067
TG(18:1_18:1_22:1)	GL	958.877	940.846	[M+NH4]+	C61H112O6	1.47971	0.000433721	0.310033	1.4177	0.000201149	0.244615	0.829078	0.31504	1.21216
TG(18:1_18:2_22:0)	GL	958.876	940.846	[M+NH4]+	C61H112O6	1.57346	0.000388146	0.247913	1.54299	0.000194799	0.17468	0.818322	0.345063	1.21396
TG(18:1_20:1_20:1)	GL	958.88	940.846	[M+NH4]+	C61H112O6	1.34898	4.34517e-05	0.236278	1.49531	1.48608e-05	0.120104	0.203678	0.550246	1.13229
TG(18:1_20:1_22:1)	GL	986.912	968.877	[M+NH4]+	C63H116O6	1.30025	0.000412777	0.31951	1.2518	0.00118783	0.364596	0.554426	0.556569	1.11049
TG(24:0_18:1_18:2)	GL	986.91	968.877	[M+NH4]+	C63H116O6	1.37676	0.00370233	0.367833	1.2198	0.00427348	0.38006	0.668338	0.530828	1.16137
TG(14:1_16:1_16:2)	GL	788.673	770.642	[M+NH4]+	C49H86O6	1.48319	9.22666e-05	0.135852	1.48714	7.52017e-05	0.10137	0.0725134	0.910745	1.02873
TG(10:0_18:1_18:3)	GL	788.673	770.642	[M+NH4]+	C49H86O6	1.57896	0.000138131	0.0809025	1.56685	0.000123922	0.0597027	0.332858	0.616747	1.11586
TG(16:1_16:1_16:2)	GL	816.705	798.674	[M+NH4]+	C51H90O6	1.62589	0.00075123	0.134042	1.55345	0.000550911	0.0963223	0.35479	0.711303	1.09774
TG(14:1_16:1_18:2)	GL	816.708	798.674	[M+NH4]+	C51H90O6	1.63311	3.12098e-05	0.110801	1.51389	2.26415e-05	0.0690135	0.183777	0.927302	1.02115
TG(12:0_18:2_18:2)	GL	816.708	798.674	[M+NH4]+	C51H90O6	1.66593	0.000896417	0.109724	1.54179	0.000784354	0.097854	0.883344	0.435616	1.18899
TG(12:0_18:1_18:3)	GL	816.708	798.674	[M+NH4]+	C51H90O6	1.60859	0.000234354	0.138406	1.44129	0.000154155	0.0949761	0.235537	0.829846	1.04757
TG(14:0_16:1_18:3)	GL	816.708	798.674	[M+NH4]+	C51H90O6	1.66024	0.000148094	0.108427	1.62139	0.00012297	0.0844258	0.331209	0.919225	0.974036
TG(16:1_17:1_16:2)	GL	830.72	812.689	[M+NH4]+	C52H92O6	1.67252	0.000220545	0.17756	1.61947	0.000145359	0.13419	0.0960029	0.602206	1.16101
TG(15:0_16:1_18:3)	GL	830.726	812.689	[M+NH4]+	C52H92O6	1.46659	4.43708e-06	0.15911	1.55678	5.57649e-06	0.0977458	0.102887	0.628558	1.12393
TG(14:0_18:2_18:2)	GL	844.74	826.705	[M+NH4]+	C53H94O6	1.66766	0.000135734	0.16977	1.55979	7.45166e-05	0.117113	0.689509	0.480293	1.13119
TG(16:1_16:1_18:2)	GL	844.739	826.705	[M+NH4]+	C53H94O6	1.6831	3.00881e-05	0.114972	1.58812	2.00872e-05	0.0772864	0.0156643	0.694532	1.11049
TG(14:0_16:0_20:4)	GL	844.74	826.705	[M+NH4]+	C53H94O6	1.61408	4.49666e-05	0.217609	1.58372	1.9151e-05	0.135043	0.647836	0.518661	1.10485
TG(16:0_16:1_18:3)	GL	844.739	826.705	[M+NH4]+	C53H94O6	1.64916	9.30876e-06	0.1546	1.60489	5.31409e-06	0.0901737	0.167316	0.641152	1.10626
TG(15:0_18:2_18:2)	GL	858.755	840.721	[M+NH4]+	C54H96O6	1.61738	8.77527e-05	0.20677	1.58403	4.7097e-05	0.136419	0.46615	0.561661	1.13157
TG(16:1_17:1_18:2)	GL	858.752	840.721	[M+NH4]+	C54H96O6	1.65089	2.39903e-05	0.163498	1.56709	1.57423e-05	0.123699	0.0901606	0.696205	1.09301
TG(16:1_18:1_18:2)	GL	872.77	854.736	[M+NH4]+	C55H98O6	1.63967	3.8e-05	0.294435	1.55788	9.02546e-06	0.195168	1.35765	0.0930327	1.27446
TG(16:0_16:0_20:4)	GL	872.774	854.736	[M+NH4]+	C55H98O6	1.64373	1.87813e-05	0.239152	1.58889	5.58171e-06	0.15851	1.16344	0.164624	1.2064
TG(16:0_18:2_18:2)	GL	872.77	854.736	[M+NH4]+	C55H98O6	1.62773	1.76639e-05	0.361101	1.53744	1.9921e-06	0.243859	1.252	0.13692	1.17647
TG(15:0_19:2_19:2)	GL	886.787	868.752	[M+NH4]+	C56H100O6	1.57447	0.00010214	0.260804	1.44729	4.17826e-05	0.20477	1.2365	0.122823	1.31646
TG(17:1_18:1_18:2)	GL	886.785	868.752	[M+NH4]+	C56H100O6	1.67031	1.91141e-05	0.190543	1.54219	7.01759e-06	0.151956	0.98102	0.206912	1.25244
TG(18:1_18:1_18:2)	GL	900.802	882.768	[M+NH4]+	C57H102O6	1.65476	5.73219e-05	0.251064	1.50098	1.82763e-05	0.21084	0.719996	0.417231	1.12324
TG(16:0_18:0_20:4)	GL	900.802	882.768	[M+NH4]+	C57H102O6	1.53029	0.000583177	0.302598	1.46913	0.000229511	0.223899	0.888845	0.423693	1.13259
TG(17:1_18:1_20:2)	GL	914.813	896.783	[M+NH4]+	C58H104O6	1.6577	3.08333e-05	0.233415	1.4955	1.11012e-05	0.216528	0.750322	0.346604	1.16299
TG(17:0_19:2_19:2)	GL	914.816	896.783	[M+NH4]+	C58H104O6	1.5779	2.05461e-07	0.273235	1.44617	7.67663e-07	0.283296	1.10717	0.1637	1.18048
TG(16:0_18:1_22:3)	GL	928.83	910.799	[M+NH4]+	C59H106O6	1.6679	6.60023e-05	0.278259	1.44103	3.15097e-05	0.261816	0.51257	0.623447	1.07212
TG(18:1_18:2_20:1)	GL	928.82	910.799	[M+NH4]+	C59H106O6	1.67663	4.21251e-05	0.275407	1.48232	1.30592e-05	0.237864	0.516381	0.585091	1.07754
TG(18:0_18:1_20:3)	GL	928.831	910.799	[M+NH4]+	C59H106O6	1.54042	0.000222334	0.411001	1.40543	5.84568e-05	0.329061	0.806523	0.44405	1.10067
TG(16:1_18:1_22:2)	GL	928.818	910.799	[M+NH4]+	C59H106O6	1.5946	0.000184963	0.280317	1.49599	0.000108432	0.245593	0.0620971	0.906176	0.980735
TG(17:1_18:1_22:2)	GL	942.843	924.815	[M+NH4]+	C60H108O6	1.35312	0.00228447	0.363812	1.42771	0.00100989	0.277057	0.981248	0.357579	1.19892
TG(18:1_21:1_18:2)	GL	942.848	924.815	[M+NH4]+	C60H108O6	1.4893	0.00143663	0.266025	1.40469	0.000884338	0.21302	0.447617	0.615628	1.13899
TG(18:1_18:1_22:2)	GL	956.862	938.83	[M+NH4]+	C61H110O6	1.57986	0.000196381	0.301829	1.39006	0.000114148	0.272942	0.676164	0.53198	1.1062
TG(18:1_22:1_18:2)	GL	956.863	938.83	[M+NH4]+	C61H110O6	1.61846	9.74427e-05	0.284651	1.46027	4.74513e-05	0.245917	0.755826	0.412424	1.14059
TG(17:1_18:1_24:2)	GL	970.875	952.846	[M+NH4]+	C62H112O6	1.52014	0.000839187	0.183513	1.47752	0.000587217	0.138452	0.0228389	0.635676	1.20238
TG(18:1_24:1_18:2)	GL	984.895	966.862	[M+NH4]+	C63H114O6	1.56641	0.000152662	0.252716	1.40997	0.000108174	0.238873	0.79782	0.353319	1.21245
TG(14:1_16:1_16:3)	GL	786.663	768.627	[M+NH4]+	C49H84O6	1.60994	1.17396e-05	0.068702	1.60775	1.61178e-05	0.0544435	0.214581	0.750775	1.05662
TG(16:0_16:2_16:3)	GL	814.692	796.658	[M+NH4]+	C51H88O6	1.49193	0.000179052	0.121916	1.52272	0.000115397	0.0566841	0.063381	0.914156	1.02416
TG(12:0_18:2_18:3)	GL	814.69	796.658	[M+NH4]+	C51H88O6	1.66113	0.000333026	0.113169	1.47625	0.000265742	0.0919174	0.169753	0.792606	0.944308
TG(14:1_16:1_18:3)	GL	814.692	796.658	[M+NH4]+	C51H88O6	1.4791	0.000122794	0.111662	1.60021	9.45357e-05	0.0623848	0.654128	0.558539	0.874763
TG(16:1_16:1_18:3)	GL	842.717	824.689	[M+NH4]+	C53H92O6	1.67122	0.000159762	0.0996943	1.60402	0.000116518	0.0614692	0.0319744	0.713488	1.10919
TG(14:0_18:2_18:3)	GL	842.724	824.689	[M+NH4]+	C53H92O6	1.6738	0.00033243	0.123616	1.58766	0.000228798	0.0820449	0.143826	0.872516	1.03658
TG(14:1_18:2_18:2)	GL	842.726	824.689	[M+NH4]+	C53H92O6	1.61991	0.000271783	0.142123	1.50633	0.000186378	0.101199	0.0623258	0.925891	0.980572
TG(12:0_16:0_22:5)	GL	842.726	824.689	[M+NH4]+	C53H92O6	1.66066	8.31808e-05	0.126272	1.53803	5.19723e-05	0.0833262	0.729003	0.344508	1.22207
TG(14:0_16:1_20:4)	GL	842.724	824.689	[M+NH4]+	C53H92O6	1.61229	8.21433e-06	0.185286	1.49003	4.35027e-06	0.124657	0.260236	0.746959	1.05038
TG(15:0_16:1_20:4)	GL	856.735	838.705	[M+NH4]+	C54H94O6	1.60222	0.000381491	0.112882	1.44708	0.000312303	0.0968445	0.42023	0.632372	0.875691
TG(15:0_18:2_18:3)	GL	856.736	838.705	[M+NH4]+	C54H94O6	1.6758	3.88131e-05	0.176831	1.63041	2.61171e-05	0.140728	0.153827	0.695075	1.08709
TG(16:1_17:1_18:3)	GL	856.74	838.705	[M+NH4]+	C54H94O6	1.67069	0.000101477	0.196768	1.61878	3.83078e-05	0.0962824	0.48119	0.487724	1.17093
TG(16:1_18:2_18:2)	GL	870.754	852.721	[M+NH4]+	C55H96O6	1.68295	6.24674e-05	0.184979	1.57671	2.79461e-05	0.120802	0.614605	0.418946	1.1618
TG(16:0_18:2_18:3)	GL	870.752	852.721	[M+NH4]+	C55H96O6	1.65521	4.49202e-05	0.256241	1.58097	9.99727e-06	0.142153	0.870299	0.262926	1.20652
TG(16:1_18:1_18:3)	GL	870.746	852.721	[M+NH4]+	C55H96O6	1.64815	3.31873e-05	0.244353	1.5942	8.26923e-06	0.131906	0.881265	0.250565	1.21933
TG(16:0_16:1_20:4)	GL	870.755	852.721	[M+NH4]+	C55H96O6	1.63117	8.11252e-06	0.249628	1.54514	2.11072e-06	0.16987	0.614025	0.423712	1.12455
TG(14:0_16:0_22:5)	GL	870.755	852.721	[M+NH4]+	C55H96O6	1.66566	3.85003e-05	0.223556	1.58995	1.33576e-05	0.143576	0.953495	0.228975	1.22656
TG(16:0_17:1_20:4)	GL	884.771	866.736	[M+NH4]+	C56H98O6	1.58521	1.45891e-05	0.24671	1.44288	5.19808e-06	0.190643	0.780048	0.383159	1.13372
TG(17:1_18:2_18:2)	GL	884.771	866.736	[M+NH4]+	C56H98O6	1.6423	0.000153449	0.21101	1.52295	7.4856e-05	0.155879	0.723559	0.394191	1.17088
TG(15:0_18:1_20:4)	GL	884.771	866.736	[M+NH4]+	C56H98O6	1.46331	0.000661761	0.380296	1.49663	0.000121401	0.231554	0.46546	0.844695	1.03146
TG(18:1_18:2_18:2)	GL	898.786	880.752	[M+NH4]+	C57H100O6	1.63725	0.000186936	0.245431	1.49301	8.21605e-05	0.196685	0.76305	0.417997	1.13698
TG(16:0_18:1_20:4)	GL	898.786	880.752	[M+NH4]+	C57H100O6	1.61392	1.86636e-05	0.359467	1.55359	2.32311e-06	0.250031	1.51494	0.0558289	1.22081
TG(16:1_18:1_20:3)	GL	898.786	880.752	[M+NH4]+	C57H100O6	1.65063	5.20072e-05	0.258829	1.49633	1.90817e-05	0.225549	0.1881	0.895481	1.01966
TG(17:0_18:1_20:4)	GL	912.798	894.768	[M+NH4]+	C58H102O6	1.42141	0.00035516	0.414366	1.50665	8.65689e-05	0.301589	0.858262	0.401734	1.12409
TG(19:1_18:2_18:2)	GL	912.798	894.768	[M+NH4]+	C58H102O6	1.64043	0.000175001	0.209761	1.49996	8.85384e-05	0.174979	0.616236	0.487141	1.13163
TG(18:1_18:2_20:2)	GL	926.815	908.783	[M+NH4]+	C59H104O6	1.67069	0.000162661	0.253139	1.49416	6.74396e-05	0.211672	0.786385	0.477127	1.11063
TG(18:0_18:3_20:2)	GL	926.818	908.783	[M+NH4]+	C59H104O6	1.65404	3.75839e-05	0.259894	1.52352	1.41468e-05	0.228406	0.0996775	0.964455	1.006
TG(16:0_18:1_22:4)	GL	926.815	908.783	[M+NH4]+	C59H104O6	1.40279	0.00057093	0.402936	1.28498	0.000369616	0.369445	1.36305	0.138379	1.21014
TG(18:0_18:1_20:4)	GL	926.817	908.783	[M+NH4]+	C59H104O6	1.54113	5.0667e-05	0.445513	1.59256	3.84327e-06	0.272352	1.53895	0.0556471	1.22706
TG(18:2_18:2_20:1)	GL	926.816	908.783	[M+NH4]+	C59H104O6	1.68226	0.000205081	0.237955	1.50581	8.81074e-05	0.186438	0.718215	0.566999	1.08994
TG(18:2_18:2_22:1)	GL	954.848	936.815	[M+NH4]+	C61H108O6	1.64402	0.000684466	0.265658	1.49968	0.000379305	0.215995	0.779696	0.492464	1.12762
TG(18:1_18:2_22:2)	GL	954.844	936.815	[M+NH4]+	C61H108O6	1.39872	0.000151408	0.338676	1.13785	0.00187129	0.421087	0.178951	0.949345	1.00891
TG(18:0_18:1_22:4)	GL	954.846	936.815	[M+NH4]+	C61H108O6	1.31463	0.00228188	0.468175	1.2431	0.000868995	0.381049	0.972574	0.400275	1.12868
TG(16:0_18:1_24:4)	GL	954.844	936.815	[M+NH4]+	C61H108O6	1.26696	0.00121334	0.338373	1.0314	0.00339601	0.398993	0.203346	0.713596	0.936139
TG(24:1_18:2_18:2)	GL	982.88	964.846	[M+NH4]+	C63H112O6	1.62299	0.000185412	0.247106	1.51306	0.000122123	0.204127	0.704428	0.433615	1.16959
TG(14:1_18:2_18:3)	GL	840.704	822.674	[M+NH4]+	C53H90O6	1.63255	0.000522399	0.14144	1.47038	0.000380279	0.106183	0.108105	0.843974	0.95735
TG(16:0_18:2_16:4)	GL	840.707	822.674	[M+NH4]+	C53H90O6	1.64655	0.000219252	0.110289	1.50249	0.000147601	0.0696247	0.805381	0.398165	1.18253
TG(14:0_16:1_20:5)	GL	840.707	822.674	[M+NH4]+	C53H90O6	1.63876	5.96089e-05	0.131122	1.53207	3.39681e-05	0.0665181	0.036485	0.721763	1.09064
TG(12:0_16:0_22:6)	GL	840.707	822.674	[M+NH4]+	C53H90O6	1.66184	0.000289946	0.0958609	1.49713	0.000223642	0.0757663	1.06245	0.241569	1.2652
TG(16:0_16:1_20:5)	GL	868.739	850.705	[M+NH4]+	C55H94O6	1.63311	0.000178225	0.224214	1.56578	7.99075e-05	0.146757	0.425137	0.656072	1.0807
TG(16:1_18:2_18:3)	GL	868.738	850.705	[M+NH4]+	C55H94O6	1.67794	0.000254867	0.145379	1.58694	0.000153545	0.0908599	0.403894	0.606659	1.11711
TG(16:0_18:2_18:4)	GL	868.742	850.705	[M+NH4]+	C55H94O6	1.60102	3.91855e-05	0.220955	1.54592	1.0526e-05	0.0895121	0.491051	0.396934	1.20574
TG(17:1_18:2_18:3)	GL	882.745	864.721	[M+NH4]+	C56H96O6	1.61571	0.000609742	0.237209	1.5297	0.000221874	0.131117	0.547841	0.579137	1.11597
TG(16:0_18:2_20:4)	GL	896.772	878.736	[M+NH4]+	C57H98O6	1.63695	0.000316443	0.204329	1.48759	0.000208468	0.175543	0.752483	0.513657	1.11367
TG(18:1_18:2_18:3)	GL	896.771	878.736	[M+NH4]+	C57H98O6	1.66005	9.4894e-05	0.216868	1.55135	3.8741e-05	0.148728	0.605905	0.439396	1.14808
TG(16:0_16:1_22:5)	GL	896.771	878.736	[M+NH4]+	C57H98O6	1.65354	5.57623e-06	0.288506	1.55231	1.19444e-06	0.203523	0.632631	0.384296	1.12057
TG(16:0_16:0_22:6)	GL	896.771	878.736	[M+NH4]+	C57H98O6	1.67558	9.1091e-05	0.160989	1.5901	5.70889e-05	0.123222	1.28951	0.143457	1.26626
TG(17:1_18:1_20:4)	GL	910.782	892.752	[M+NH4]+	C58H100O6	1.51107	0.000146806	0.397053	1.46603	6.02889e-05	0.335885	0.0937922	0.719845	0.957156
TG(16:0_17:0_22:6)	GL	910.776	892.752	[M+NH4]+	C58H100O6	1.45171	8.13328e-06	0.472504	1.46563	3.46511e-07	0.342789	1.42539	0.0687721	1.21201
TG(16:0_18:1_22:5)	GL	924.802	906.768	[M+NH4]+	C59H102O6	1.58978	0.000290741	0.242653	1.5087	0.000163497	0.18941	1.24413	0.202591	1.20656
TG(18:0_18:2_20:4)	GL	924.802	906.768	[M+NH4]+	C59H102O6	1.5643	7.28947e-05	0.443065	1.51702	8.3044e-06	0.329829	1.06993	0.242876	1.12039
TG(16:0_18:0_22:6)	GL	924.802	906.768	[M+NH4]+	C59H102O6	1.48811	0.000510653	0.321716	1.46335	0.000255488	0.257382	1.3611	0.16923	1.21314
TG(18:2_18:2_20:2)	GL	924.802	906.768	[M+NH4]+	C59H102O6	1.53865	0.000354878	0.315218	1.40742	0.000212111	0.281055	0.425144	0.835241	1.0306
TG(18:1_18:1_22:4)	GL	952.832	934.799	[M+NH4]+	C61H106O6	1.47589	0.000581887	0.345462	1.2005	0.00188319	0.391346	0.722052	0.64124	1.06717
TG(18:0_18:0_22:6)	GL	952.834	934.799	[M+NH4]+	C61H106O6	1.65152	0.000105055	0.284174	1.52882	4.92507e-05	0.246123	1.66382	0.0561389	1.27601
TG(18:0_18:1_22:5)	GL	952.832	934.799	[M+NH4]+	C61H106O6	1.31394	0.00293872	0.503267	1.38074	0.000464378	0.364826	0.288291	0.974412	1.00428
TG(12:0_18:3_20:4)	GL	838.689	820.658	[M+NH4]+	C53H88O6	1.36597	0.000335008	0.254837	1.24962	9.8818e-05	0.130236	0.135997	0.897024	1.0257
TG(14:0_18:3_20:4)	GL	866.724	848.689	[M+NH4]+	C55H92O6	1.56571	0.000251455	0.176658	1.56568	0.000131523	0.0963467	0.0819679	0.827615	1.05331
TG(16:1_16:1_20:5)	GL	866.724	848.689	[M+NH4]+	C55H92O6	1.56966	3.88433e-05	0.183751	1.53474	1.40998e-05	0.0816511	0.150718	0.859907	1.04624
TG(16:2_18:2_18:3)	GL	866.723	848.689	[M+NH4]+	C55H92O6	1.58697	0.00039928	0.148651	1.46043	0.000229554	0.0825227	0.35032	0.698512	1.0929
TG(15:0_16:1_22:6)	GL	880.732	862.705	[M+NH4]+	C56H94O6	1.67073	9.50894e-05	0.127904	1.49961	7.27615e-05	0.102582	0.368512	0.540965	1.15983
TG(16:0_18:2_20:5)	GL	894.752	876.721	[M+NH4]+	C57H96O6	1.51736	0.0018911	0.302256	1.46271	0.000723381	0.199779	0.876868	0.575705	1.0992
TG(16:0_16:1_22:6)	GL	894.755	876.721	[M+NH4]+	C57H96O6	1.65482	4.75185e-05	0.169957	1.55829	2.80599e-05	0.135099	0.768841	0.375615	1.16287
TG(18:1_18:2_18:4)	GL	894.752	876.721	[M+NH4]+	C57H96O6	1.61961	9.48566e-05	0.199044	1.58845	3.60772e-05	0.0936205	0.00955075	0.859492	1.0365
TG(18:2_18:2_18:3)	GL	894.755	876.721	[M+NH4]+	C57H96O6	1.61732	0.00095039	0.211231	1.53951	0.000502298	0.138829	0.558821	0.59298	1.11991
TG(15:0_18:1_22:6)	GL	908.771	890.736	[M+NH4]+	C58H98O6	1.58398	8.59022e-05	0.249787	1.5413	4.06097e-05	0.185982	0.848674	0.388918	1.14813
TG(17:0_18:2_20:5)	GL	908.771	890.736	[M+NH4]+	C58H98O6	1.5113	0.00095313	0.358868	1.27715	0.000479554	0.307685	0.597119	0.706344	1.05683
TG(18:1_18:2_20:4)	GL	922.783	904.752	[M+NH4]+	C59H100O6	1.52948	0.000112359	0.465968	1.45504	1.2077e-05	0.346001	0.931779	0.341577	1.09614
TG(16:0_18:1_22:6)	GL	922.786	904.752	[M+NH4]+	C59H100O6	1.5293	0.000167475	0.335751	1.46924	7.47634e-05	0.276255	1.53952	0.0912126	1.22545
TG(16:1_16:1_24:5)	GL	922.807	904.752	[M+NH4]+	C59H100O6	1.6292	4.03498e-05	0.26527	1.50067	1.81364e-05	0.222061	0.684064	0.5679	1.07333
TG(17:0_18:1_22:6)	GL	936.807	918.768	[M+NH4]+	C60H102O6	1.55536	4.50023e-05	0.285385	1.48109	2.42057e-05	0.249938	1.15684	0.234746	1.17738
TG(18:0_18:1_22:6)	GL	950.818	932.783	[M+NH4]+	C61H104O6	1.63353	0.00011895	0.254516	1.54662	7.14353e-05	0.220428	1.3665	0.16912	1.19908
TG(18:1_18:1_22:5)	GL	950.818	932.783	[M+NH4]+	C61H104O6	0.980688	0.0343442	0.567502	0.704627	0.149869	0.671221	0.133691	0.557107	0.894908
TG(18:1_18:2_22:4)	GL	950.818	932.783	[M+NH4]+	C61H104O6	1.51887	0.000469981	0.303109	1.33166	0.000508371	0.297962	0.633256	0.718373	1.05431
TG(16:0_20:2_22:5)	GL	950.818	932.783	[M+NH4]+	C61H104O6	1.14378	0.00612301	0.500832	1.06521	0.00554904	0.47834	0.0554807	0.696843	0.941913
TG(19:0_18:1_22:6)	GL	964.833	946.799	[M+NH4]+	C62H106O6	1.55479	9.34951e-05	0.31738	1.45623	1.6412e-05	0.197114	1.27858	0.172417	1.25797
TG(14:1_16:1_22:6)	GL	864.705	846.674	[M+NH4]+	C55H90O6	1.5989	0.00100706	0.183665	1.42282	0.000610273	0.128894	0.687123	0.745186	1.06396
TG(14:1_18:2_20:5)	GL	864.708	846.674	[M+NH4]+	C55H90O6	0.968146	0.00596366	0.380443	1.05354	0.00567074	0.355473	0.630987	0.392163	0.829955
TG(18:2_18:3_18:3)	GL	892.739	874.705	[M+NH4]+	C57H94O6	1.58409	0.00107076	0.249379	1.50716	0.000467962	0.161276	0.223255	0.943629	1.01413
TG(16:1_16:1_22:6)	GL	892.725	874.705	[M+NH4]+	C57H94O6	1.60386	0.00135559	0.196379	1.53984	0.000870358	0.14464	0.809266	0.625048	1.09961
TG(16:0_18:2_22:6)	GL	920.766	902.736	[M+NH4]+	C59H98O6	1.37503	0.00169782	0.374552	1.41779	0.000589341	0.275721	0.939489	0.506836	1.10393
TG(16:1_18:1_22:6)	GL	920.766	902.736	[M+NH4]+	C59H98O6	1.59109	0.000104044	0.257054	1.46948	6.5989e-05	0.244012	0.485318	0.843201	1.02684
TG(16:1_16:1_24:6)	GL	920.766	902.736	[M+NH4]+	C59H98O6	1.38633	0.00242328	0.364602	1.42486	0.000870146	0.262186	1.16228	0.347588	1.15816
TG(17:0_18:2_22:6)	GL	934.786	916.752	[M+NH4]+	C60H100O6	1.47076	0.000393336	0.346032	1.38789	0.00023452	0.309764	0.672948	0.670833	1.05984
TG(18:1_18:2_22:5)	GL	948.798	930.768	[M+NH4]+	C61H102O6	0.77325	0.0640227	0.617144	0.819348	0.0666781	0.588724	0.366277	0.866767	0.968366
TG(18:1_18:1_22:6)	GL	948.797	930.768	[M+NH4]+	C61H102O6	1.28793	0.00322049	0.408875	1.15995	0.00469123	0.419972	0.427514	0.968559	0.99368
TG(18:0_18:2_22:6)	GL	948.801	930.768	[M+NH4]+	C61H102O6	1.35216	0.00215768	0.376709	1.27932	0.00164439	0.349208	0.57759	0.884224	1.02296
TG(18:2_18:2_22:4)	GL	948.801	930.768	[M+NH4]+	C61H102O6	1.51114	0.00148018	0.273018	1.39842	0.00112951	0.250991	0.359897	0.968592	1.00732
TG(17:1_17:1_24:6)	GL	948.801	930.768	[M+NH4]+	C61H102O6	0.7732	0.0600053	0.637062	0.839812	0.0265855	0.57473	1.18226	0.0994936	0.719381
TG(18:1_20:1_22:6)	GL	976.833	958.799	[M+NH4]+	C63H106O6	1.42821	0.0021957	0.371863	1.15639	0.00485694	0.408157	0.940514	0.586248	1.08822
TG(18:1_20:3_22:4)	GL	976.83	958.799	[M+NH4]+	C63H106O6	0.991743	0.0174019	0.528945	0.718126	0.159476	0.642478	0.258104	0.474854	0.872837
TG(18:1_22:1_22:6)	GL	1004.86	986.83	[M+NH4]+	C65H110O6	1.40805	0.000914454	0.389959	1.03708	0.00641427	0.479809	0.730048	0.414796	1.16215
TG(18:2_18:3_18:4)	GL	890.726	872.689	[M+NH4]+	C57H92O6	1.36948	2.14113e-05	0.35566	1.44384	1.93444e-06	0.170109	0.00464894	0.83164	1.03526
TG(16:1_16:2_22:6)	GL	890.724	872.689	[M+NH4]+	C57H92O6	1.27749	0.00655375	0.324442	1.20901	0.00394198	0.263946	0.0747182	0.603585	0.893382
TG(16:1_18:2_22:6)	GL	918.755	900.721	[M+NH4]+	C59H96O6	1.52087	0.00218191	0.253884	1.4969	0.00121715	0.185612	0.516099	0.939539	1.01483
TG(18:2_18:3_20:4)	GL	918.755	900.721	[M+NH4]+	C59H96O6	1.04766	0.0048125	0.622251	1.23598	7.38298e-05	0.385242	0.55844	0.592131	1.05943
TG(18:1_18:2_22:6)	GL	946.788	928.752	[M+NH4]+	C61H100O6	1.26423	0.00654854	0.383607	1.23819	0.00451404	0.340274	0.343742	0.865349	0.967865
TG(18:2_20:3_20:4)	GL	946.786	928.752	[M+NH4]+	C61H100O6	0.585679	0.148438	1.22433	0.207913	0.806734	0.958876	0.733779	0.293089	1.16283
TG(16:0_20:4_22:5)	GL	946.786	928.752	[M+NH4]+	C61H100O6	1.33204	0.00373388	0.339442	1.32581	0.00231962	0.289033	0.336386	0.869857	0.969471
TG(20:1_18:2_22:6)	GL	974.817	956.783	[M+NH4]+	C63H104O6	1.47884	0.00349986	0.305923	1.33405	0.00363037	0.302479	0.580618	0.903191	1.02367
TG(22:1_18:2_22:6)	GL	1002.85	984.815	[M+NH4]+	C65H108O6	1.54517	0.000511206	0.307277	1.24969	0.000903657	0.343484	1.57935	0.126148	1.27005
TG(18:2_18:3_20:5)	GL	916.739	898.705	[M+NH4]+	C59H94O6	0.977493	0.0234174	0.578492	1.19122	0.00146607	0.332039	0.224469	0.5632	0.905522
TG(16:1_20:4_20:5)	GL	916.739	898.705	[M+NH4]+	C59H94O6	0.868222	0.047011	0.608398	1.11748	0.00427268	0.380494	0.00688731	0.712466	0.936375
TG(18:2_18:2_22:6)	GL	944.77	926.736	[M+NH4]+	C61H98O6	1.21143	0.0154321	0.327815	1.22943	0.0103302	0.271961	0.437132	0.842084	0.951846
TG(18:2_20:4_20:4)	GL	944.771	926.736	[M+NH4]+	C61H98O6	1.12292	0.0209306	0.391915	1.13755	0.0126942	0.32491	0.373697	0.810707	0.944209
TG(16:0_20:4_22:6)	GL	944.771	926.736	[M+NH4]+	C61H98O6	1.58817	0.000106577	0.320166	1.48485	3.55425e-05	0.259989	1.75661	0.0356039	1.284
TG(18:0_20:4_22:6)	GL	972.802	954.768	[M+NH4]+	C63H102O6	0.992659	0.019061	0.55873	0.837181	0.0464517	0.595662	0.336463	0.981339	0.996025
TG(18:1_20:3_22:6)	GL	972.802	954.768	[M+NH4]+	C63H102O6	0.554883	0.290431	0.839313	0.718125	0.0540253	0.763289	0.0130916	0.931526	0.989693
TG(14:0_20:5_22:6)	GL	914.724	896.689	[M+NH4]+	C59H92O6	1.21584	0.005269	0.409677	1.12759	0.00264655	0.335669	0.0679303	0.531969	0.891754
TG(18:2_18:3_22:6)	GL	942.755	924.721	[M+NH4]+	C61H96O6	0.839475	0.0364099	0.531962	1.16295	0.00722625	0.348815	0.0331152	0.558567	0.88176
TG(18:2_20:4_20:5)	GL	942.755	924.721	[M+NH4]+	C61H96O6	0.0767618	0.869772	1.03769	0.339469	0.712388	0.901806	0.102057	0.910512	0.976306
TG(16:0_22:5_22:6)	GL	970.785	952.752	[M+NH4]+	C63H100O6	0.220333	0.253768	0.831124	0.693156	0.0334667	0.652985	0.525232	0.677695	1.06976
TG(18:1_20:4_22:6)	GL	970.782	952.752	[M+NH4]+	C63H100O6	0.0810837	0.901206	0.980559	0.352286	0.243893	0.817038	0.537315	0.493966	1.12897
TG(18:2_20:5_20:5)	GL	940.739	922.705	[M+NH4]+	C61H94O6	0.0140442	0.931135	0.978602	0.544692	0.282495	0.719109	0.11889	0.809857	0.945301
TG(14:0_22:6_22:6)	GL	940.739	922.705	[M+NH4]+	C61H94O6	0.875441	0.0234195	0.61221	1.17556	0.00156915	0.384194	0.842321	0.210468	0.803995
TG(16:0_22:6_22:6)	GL	968.771	950.736	[M+NH4]+	C63H98O6	0.239407	0.808441	1.05229	0.135209	0.498333	0.860546	0.493286	0.674531	1.0951
TG(18:1_22:5_22:6)	GL	996.802	978.768	[M+NH4]+	C65H102O6	0.755612	0.195365	1.38862	0.724719	0.118863	1.59521	0.134058	0.846038	0.945539
TG(18:2_20:5_22:6)	GL	966.755	948.721	[M+NH4]+	C63H96O6	0.0679617	0.562512	0.858145	0.390256	0.223372	0.69947	0.0833861	0.785331	0.931968
TG(18:2_22:5_22:6)	GL	994.786	976.752	[M+NH4]+	C65H100O6	0.100118	0.754499	0.918521	0.181881	0.807043	0.940801	0.387774	0.932405	1.02344

## Sheet: Table S2
Table S2 Representative differential metabolites among Model_7Day, Model_14Day, Model_28Day, and Control
Compounds	Class	Q1 (Da)	Molecular Weight (Da)	Ionization model	Formula	Control vs Model_7Day			Control vs Model_14Day			Control vs Model_28Day
						VIP	P-value	FC	VIP	P-value	FC	VIP	P-value	FC
Allantoin	Organic acid And Its derivatives	157.036	158.044	[M-H]-	C4H6N4O3	1.13331	0.00338775	0.774589	1.40551	6.05271e-05	0.659214	1.98266	0.0089159	0.809007
13-HOTrE	Oxidized lipids	293.212	294.1	[M-H]-	C18H30O3	1.14128	0.002532	0.581602	1.52853	1.20588e-05	0.209192	2.36896	0.00539791	0.591837
Hexadecanoic Acid(C16:0)	FA	255.232	256.24	[M-H]-	C16H32O2	1.60912	1.23543e-08	1.92419	1.56338	1.33516e-08	1.89328	3.27969	1.99376e-09	2.04613
Linoleic Acid(C18:2N6C)	FA	279.232	280.24	[M-H]-	C18H32O2	1.4936	4.92392e-07	1.39818	1.19485	0.000724927	1.25533	3.12576	6.60383e-08	1.47576
Dodecanoic Acid(C12:0)	FA	199.17	200.17	[M-H]-	C12H24O2	1.32914	0.000214219	0.553907	1.25822	0.000330131	0.564401	2.16072	0.00584429	0.699855
Elaidic Acid(C18:1N9T)	FA	281.248	282.25	[M-H]-	C18H34O2	1.5665	3.33335e-08	1.73173	1.5178	4.23337e-07	1.7825	3.25109	2.7702e-09	2.01909
DHA	Oxidized lipids	327.232	328.24	[M-H]-	C22H32O2	1.61736	6.52152e-09	1.84494	1.33591	0.000383187	1.52126	3.19709	1.11188e-06	1.84569
Xanthosine	Nucleotide And Its metabolomics	283.068	284.076	[M-H]-	C10H12N4O6	1.14311	0.0108072	1.48253	1.68205	2.01074e-07	0.156193	2.52948	0.00143053	0.707607
Carbamoyl phosphate	Organic acid And Its derivatives	139.975	140.983	[M-H]-	CH4NO5P	1.25972	0.00170192	0.668963	1.50863	2.71602e-05	0.465776	2.17131	0.00877628	0.732401
13(R)-HODE	Oxidized lipids	295.2	296.235	[M-H]-	C18H32O3	1.27927	0.00125523	0.542252	1.58107	1.85946e-05	0.215248	1.99314	0.0308874	0.68714
9,12-octadecadienoic acid	FA	275.201	276.209	[M-H]-	C18H28O2	1.46808	4.99662e-05	0.411416	1.46648	3.95583e-06	0.253804	2.02188	0.0138154	0.67127
4,7,10,13,16,19-hexanoic acid	Oxidized lipids	327.232	328.24	[M-H]-	C22H32O2	1.61736	6.52152e-09	1.84494	1.33591	0.000383187	1.52126	3.19709	1.11188e-06	1.84569
DL-2-hydroxystearic acid	FA	299.259	300.266	[M-H]-	C18H36O3	1.37401	0.000405292	1.84844	1.27492	0.00160791	1.74619	2.95751	8.08416e-05	1.85965
2-hydroxyhexadecanoic acid	FA	271.227	272.235	[M-H]-	C16H32O3	1.50413	7.71029e-06	1.77223	1.05465	0.00440606	1.48482	3.03207	3.77564e-06	1.81595
8,11-icosadienoic acid	FA	303.2	304.24	[M-H]-	C20H32O2	1.62664	4.31988e-09	2.02879	1.38674	2.71065e-05	1.4857	3.12285	2.22565e-07	1.74214
cis-1-Pentadecenoic Acid(C15: 1)	FA	239.201	240.209	[M-H]-	C15H28O2	1.27429	0.000248963	1.75916	1.19865	0.000383095	1.66732	2.28444	0.00319194	1.50532
Adenosine	Nucleotide And Its metabolomics	268.097	267.097	[M+H]+	C10H13N5O4	0.82144	0.0381535	1.26326	1.70323	5.922e-05	72.3115	1.42816	0.206557	2.19687
L-Thyroxine	Hormones and hormone related compunds	777.687	776.687	[M+H]+	C15H11I4NO4	1.2219	0.000673863	1.49849	1.38092	2.4595e-05	1.52825	1.93753	0.0143495	1.1892
N-Methyltryptamine	Tryptamines,Cholines,Pigments	175	174.116	[M+H]+	C11H14N2	1.30888	2.30612e-05	4.76273	1.33271	0.00422644	8.44891	1.83843	0.0158278	3.03168
Methyl Indole-3-Acetate	Heterocyclic compounds	190.1	189.079	[M+H]+	C11H11NO2	1.07671	0.00386069	1.80356	1.33082	9.58898e-05	2.07581	2.07556	0.0079832	1.83882
Punicic Acid	FA	279.3	278.225	[M+H]+	C18H30O2	1.23977	0.00100402	0.488275	1.50782	3.56371e-05	0.232912	2.23686	0.0100763	0.605505
LPI(18:2/0:0)	GP	595.288	596.296	[M-H]-	C27H49O12P	1.00132	0.00801185	1.36823	1.32194	0.000282168	0.50728	1.73776	0.0294843	0.717998
PE(22:6_16:0)	GP	762.507	763.515	[M-H]-	C43H74NO8P	1.65582	6.78402e-06	0.390628	1.05069	0.00729909	0.696298	2.22433	0.00498392	1.28677
PG(18:0_18:2)	GP	773.541	774.541	[M-H]-	C42H79O10P	1.40659	0.000157664	0.476157	1.08663	0.00246096	0.577561	2.15766	0.00522286	1.39709
PS(18:0_18:0)	GP	790.56	791.568	[M-H]-	C42H82NO10P	1.6278	5.54735e-05	0.330245	1.21295	0.00117777	0.536227	2.023	0.00724741	1.39659
Carnitine C12:1	FA	342.265	341.257	[M+H]+	C19H35NO4	1.25581	0.000421079	0.585167	1.04958	0.00162547	0.580694	1.52222	0.03576	0.77195
Carnitine C14:2	FA	368.281	367.272	[M+H]+	C21H37NO4	1.37274	0.000316831	0.643496	1.02506	0.00555554	0.632553	1.92205	0.0104269	0.776877
DG(15:0_18:0)	GL	600.554	582.522	[M+NH4]+	C36H70O5	1.13029	0.005079	0.765623	1.00298	0.00737201	0.756137	1.82716	0.0175149	0.811817
MG(17:0)	GL	362.321	344.293	[M+NH4]+	C20H40O4	1.42434	0.000102603	0.809381	1.23972	0.000186033	0.803358	1.90736	0.0196917	0.905518
MG(18:0)	GL	376.352	358.308	[M+NH4]+	C21H42O4	1.29018	0.000176756	0.85164	1.15627	0.00216949	0.901012	2.01492	0.0108319	0.914355
LPC(0:0/15:0)	GP	482.322	481.317	[M+H]+	C23H48NO7P	1.02416	0.00735988	0.819462	1.42486	3.48472e-06	0.632817	1.96056	0.011454	0.871551
LPC(16:1/0:0)	GP	494.325	493.317	[M+H]+	C24H48NO7P	1.26713	0.00114229	0.723855	1.49287	9.32914e-06	0.554019	1.91201	0.0142944	0.796899
PC(16:0_22:6)	GP	806.57	805.562	[M+H]+	C46H80NO8P	1.07711	0.00547425	0.82636	1.16197	0.0011833	0.810073	1.91737	0.0124833	1.11168
PE(18:0_22:4)	GP	796.586	795.578	[M+H]+	C45H82NO8P	1.34989	0.00028047	0.627364	1.0849	0.00252146	0.713576	1.7477	0.0265158	1.20691
PE(20:5_18:1)	GP	764.523	763.515	[M+H]+	C43H74NO8P	1.64772	1.84104e-05	0.29686	1.06918	0.00602066	0.643789	1.88796	0.0204217	1.28211
PE(17:0_22:6)	GP	778.539	777.531	[M+H]+	C44H76NO8P	1.64474	8.07292e-06	0.357096	1.09968	0.00153999	0.626356	1.95191	0.0192147	1.22819
PE(22:6_18:0)	GP	792.554	791.547	[M+H]+	C45H78NO8P	1.64671	4.95926e-05	0.303699	1.22925	0.000840606	0.506093	1.94942	0.0217049	1.29965
PE(19:0_22:6)	GP	806.57	805.562	[M+H]+	C46H80NO8P	1.70396	4.72403e-07	0.356315	1.31601	1.9088e-05	0.523869	1.68486	0.0378806	1.18721
PG(18:0_18:1)	GP	794.591	776.557	[M+NH4]+	C42H81O10P	1.4805	2.18018e-06	0.311047	1.35475	6.40926e-05	0.486677	1.6536	0.034867	1.23959
PG(18:1_18:1)	GP	792.575	774.541	[M+NH4]+	C42H79O10P	1.50549	0.000375346	0.449413	1.22375	0.00171778	0.53447	1.99518	0.023598	1.3085
TG(16:0_20:4_22:6)	GL	944.771	926.736	[M+NH4]+	C61H98O6	1.58817	0.000106577	0.320166	1.48485	3.55425e-05	0.259989	1.75661	0.0356039	1.284
O-Phosphorylethanolamine	GP	140.011	141.019	[M-H]-	C2H8NO4P	1.30456	0.000867011	0.640807	1.42394	4.20634e-05	0.49405	2.19249	0.00828844	0.739464
Sphingosine	SL	300.289	299.282	[M+H]+	C18H37NO2	1.13228	0.00304201	1.4569	0.975567	0.00978201	1.29153	0.285214	0.785448	1.02495
SPH(d18:1)	SL	300.29	299.282	[M+H]+	C18H37NO2	0.296707	0.471645	1.08187	1.40243	7.13375e-06	0.461234	2.33948	0.00228075	0.677383
S1P(d18:1)	SL	380.257	379.249	[M+H]+	C18H38NO5P	1.21285	0.00184694	1.96946	0.535352	0.227661	1.45468	1.09244	0.243207	1.32645
Cer(d18:1/24:1)	SL	648.629	647.622	[M+H]+	C42H81NO3	1.02348	0.00582116	0.789226	1.34811	7.0502e-05	0.692643	0.823793	0.232781	1.10444
HexCer(d18:1/18:0)	SL	728.604	727.596	[M+H]+	C42H81NO8	1.08094	0.00485186	0.704688	1.03927	0.00503287	0.67731	1.09963	0.185804	1.12872
SHexCer (d18:1:/24:0)	SL	892.8	891.647	[M+H]+	C48H93NO11S	1.16418	0.00145463	0.566619	1.3361	0.000133028	0.441822	0.81131	0.316556	1.13711
SM(d18:1/12:0)	SL	647.513	646.505	[M+H]+	C35H71N2O6P	1.32466	0.000106944	0.658708	1.38505	2.78069e-05	0.619553	0.231327	0.701601	1.03111

## Sheet: Table S3
Table S3 LEfSe (LDA effect size) analysis of all samples identified 79 taxa
Taxa	Abundace	Group	LDA_score	P-value
Bacteria.Verrucomicrobia.Verrucomicrobiae.Verrucomicrobiales.Akkermansiaceae	5.04762	Control	4.67886	0.031909
Bacteria.Firmicutes.Clostridia.Clostridiales.Ruminococcaceae.Faecalibacterium.Faecalibacterium_prausnitzii	0.937553	Control	2.44731	0.0299004
Bacteria.Verrucomicrobia	5.04762	Control	4.67886	0.031909
Bacteria.Firmicutes.Clostridia.Clostridiales.Ruminococcaceae.Faecalibacterium	0.956689	Control	2.51174	0.0254684
Bacteria.Firmicutes.Clostridia.Clostridiales.Lachnospiraceae.Roseburia.Roseburia_inulinivorans	1.41231	Control	2.22163	0.00335399
Bacteria.Verrucomicrobia.Verrucomicrobiae	5.04762	Control	4.67886	0.031909
Bacteria.Verrucomicrobia.Verrucomicrobiae.Verrucomicrobiales.Akkermansiaceae.Akkermansia	5.04762	Control	4.67886	0.031909
Bacteria.Verrucomicrobia.Verrucomicrobiae.Verrucomicrobiales.Akkermansiaceae.Akkermansia.Akkermansia_muciniphila	5.04762	Control	4.67886	0.031909
Bacteria.Verrucomicrobia.Verrucomicrobiae.Verrucomicrobiales	5.04762	Control	4.67886	0.031909
Bacteria.Firmicutes.Clostridia.Clostridiales.Eubacteriaceae	3.79507	Model_7Day	3.32626	0.0258997
Bacteria.Firmicutes.Clostridia.Clostridiales.Catabacteriaceae.Catabacter	0	Model_7Day	3.42369	0.0236589
Bacteria.Bacteroidetes.Bacteroidia.Bacteroidales.Prevotellaceae.Prevotella.Prevotella_sp_MGM1	4.56775	Model_7Day	4.14987	0.0129711
Bacteria.Firmicutes.Clostridia.Clostridiales.Catabacteriaceae	0	Model_7Day	3.23705	0.0236589
Eukaryota.Apicomplexa.Conoidasida.Eucoccidiorida	1.01807	Model_7Day	2.86182	0.0236589
Bacteria.Firmicutes.Clostridia.Clostridiales.Ruminococcaceae.Negativibacillus	1.32408	Model_7Day	2.36734	0.00246823
Bacteria.Proteobacteria.Betaproteobacteria.Burkholderiales.Burkholderiaceae.Pandoraea	0	Model_7Day	3.47001	0.0236589
Eukaryota.Apicomplexa.Conoidasida.Eucoccidiorida.Cryptosporidiidae.Cryptosporidium.Cryptosporidium_muris	1.01807	Model_7Day	2.71809	0.0236589
Bacteria.Actinobacteria.Coriobacteriia.Eggerthellales.Eggerthellaceae.Gordonibacter.Gordonibacter_sp_An232A	2.34841	Model_7Day	2.04434	0.0245881
Eukaryota.Ascomycota	0.337859	Model_7Day	2.60715	0.0047349
Bacteria.Firmicutes.Bacilli.Bacillales.Staphylococcaceae.Staphylococcus.Staphylococcus_lentus	1.25815	Model_7Day	2.58495	0.00352224
Bacteria.Proteobacteria	3.93174	Model_7Day	3.4775	0.0260381
Eukaryota.Ascomycota.Sordariomycetes.Hypocreales.Nectriaceae.Fusarium.Fusarium_verticillioides	0.337859	Model_7Day	2.59559	0.0047349
Bacteria.Firmicutes.Clostridia.Clostridiales.Lachnospiraceae.Blautia	3.60948	Model_7Day	3.00968	0.0288084
Eukaryota.Ascomycota.Sordariomycetes.Hypocreales	0.337859	Model_7Day	2.56777	0.0047349
Eukaryota.Apicomplexa.Conoidasida.Eucoccidiorida.Cryptosporidiidae	1.01807	Model_7Day	2.89208	0.0236589
Bacteria.Firmicutes.Clostridia.Clostridiales.Eubacteriaceae.Eubacterium	3.79456	Model_7Day	3.32624	0.0258997
Eukaryota	1.10999	Model_7Day	2.46532	0.00175767
Bacteria.Firmicutes.Bacilli.Bacillales.Staphylococcaceae.Jeotgalicoccus.Jeotgalicoccus_halotolerans	0.311771	Model_7Day	3.08337	0.0236589
Bacteria.Proteobacteria.Betaproteobacteria.Burkholderiales.Burkholderiaceae.Pandoraea.Pandoraea_sputorum	0	Model_7Day	3.54857	0.0236589
Eukaryota.Ascomycota.Sordariomycetes.Hypocreales.Nectriaceae.Fusarium	0.337859	Model_7Day	2.59158	0.0047349
Bacteria.Firmicutes.Clostridia.Clostridiales.Ruminococcaceae.Negativibacillus.Negativibacillus_massiliensis	1.32408	Model_7Day	2.36734	0.00246823
Bacteria.Firmicutes.Bacilli.Bacillales.Staphylococcaceae.Jeotgalicoccus	0.311771	Model_7Day	3.0783	0.0236589
Eukaryota.Apicomplexa.Conoidasida	1.01807	Model_7Day	2.65728	0.0236589
Bacteria.Firmicutes.Clostridia.Clostridiales.Eubacteriaceae.Eubacterium.Eubacterium_sp_14_2	3.60599	Model_7Day	3.2532	0.0113802
Eukaryota.Ascomycota.Sordariomycetes	0.337859	Model_7Day	2.57865	0.0047349
Eukaryota.Apicomplexa.Conoidasida.Eucoccidiorida.Cryptosporidiidae.Cryptosporidium	1.01807	Model_7Day	2.66272	0.0236589
Eukaryota.Apicomplexa	1.01807	Model_7Day	2.79061	0.0236589
Bacteria.Bacteroidetes.Bacteroidia.Bacteroidales.Bacteroidaceae.Bacteroides.Bacteroides_sp_AM44_19	2.94119	Model_7Day	2.44806	0.0404857
Bacteria.Firmicutes.Clostridia.Clostridiales.Lachnospiraceae.Blautia.Blautia_coccoides	3.33139	Model_7Day	2.9234	0.000258635
Bacteria.Firmicutes.Clostridia.Clostridiales.Catabacteriaceae.Catabacter.Catabacter_hongkongensis	0	Model_7Day	3.22266	0.0236589
Eukaryota.Ascomycota.Sordariomycetes.Hypocreales.Nectriaceae	0.337859	Model_7Day	2.55436	0.0047349
Bacteria.Candidatus_Saccharibacteria	1.01399	Model_7Day	2.8604	0.000910388
Bacteria.Firmicutes.Bacilli.Lactobacillales.Lactobacillaceae.Lactobacillus.Lactobacillus_reuteri	3.2364	Model_14Day	2.94724	0.00259543
Bacteria.Firmicutes.Clostridia.Clostridiales.Lachnospiraceae.Anaerostipes	1.11092	Model_14Day	2.495	0.00682083
Bacteria.Firmicutes.Bacilli.Lactobacillales.Lactobacillaceae.Lactobacillus	4.77479	Model_14Day	4.41997	0.0325931
Bacteria.Firmicutes.Clostridia.Clostridiales.Peptostreptococcaceae	3.3519	Model_14Day	2.68178	0.00582351
Bacteria.Firmicutes.Clostridia.Clostridiales.Lachnospiraceae.Lachnoclostridium._Clostridium__lavalense	2.88098	Model_14Day	2.47621	0.015493
Bacteria.Proteobacteria.Betaproteobacteria.Burkholderiales.Burkholderiaceae.Cupriavidus.Cupriavidus_pauculus	1.23056	Model_14Day	2.58078	0.000135531
Bacteria.Bacteroidetes.Bacteroidia.Bacteroidales.Bacteroidaceae.Bacteroides.Bacteroides_sp_3_1_40A	2.35294	Model_14Day	2.3151	0.0236589
Bacteria.Firmicutes.Bacilli.Lactobacillales.Lactobacillaceae	4.77479	Model_14Day	4.41997	0.0325931
Bacteria.Firmicutes.Clostridia.Clostridiales.Lachnospiraceae.Anaerostipes.Anaerostipes_sp_AF04_45	1.09239	Model_14Day	2.66529	0.00101039
Bacteria.Actinobacteria.Actinobacteria.Bifidobacteriales.Bifidobacteriaceae.Bifidobacterium.Bifidobacterium_pseudolongum	4.65378	Model_28Day	4.28144	0.00572132
Bacteria.Actinobacteria.Coriobacteriia.Coriobacteriales.Atopobiaceae.Olsenella	0.794381	Model_28Day	2.66179	0.0302235
Bacteria.Bacteroidetes.Bacteroidia.Bacteroidales.Bacteroidaceae.Bacteroides.Bacteroides_fragilis	3.11744	Model_28Day	2.46346	0.0133075
Bacteria.Proteobacteria.Gammaproteobacteria.Enterobacterales.Enterobacteriaceae.Cronobacter.Cronobacter_dublinensis	1.17671	Model_28Day	2.91068	0.00490283
Bacteria.Actinobacteria.Actinobacteria.Bifidobacteriales.Bifidobacteriaceae.Bifidobacterium.Bifidobacterium_gallinarum	0.76565	Model_28Day	3.04916	0.00338845
Bacteria.Actinobacteria.Actinobacteria.Bifidobacteriales.Bifidobacteriaceae	4.65461	Model_28Day	4.28231	0.00572132
Bacteria.Bacteroidetes.Bacteroidia.Bacteroidales.Odoribacteraceae.Butyricimonas.Butyricimonas_synergistica	2.6651	Model_28Day	2.1048	0.0368141
Bacteria.Proteobacteria.Gammaproteobacteria.Vibrionales.Vibrionaceae.Vibrio	0	Model_28Day	3.52365	0.0047349
Bacteria.Actinobacteria.Actinobacteria.Micrococcales.Micrococcaceae.Arthrobacter.Arthrobacter_psychrolactophilus	0.292829	Model_28Day	3.27803	0.00187068
Bacteria.Firmicutes.Bacilli.Lactobacillales.Enterococcaceae.Enterococcus.Enterococcus_plantarum	0.885654	Model_28Day	2.77627	0.00187068
Bacteria.Actinobacteria.Actinobacteria.Bifidobacteriales.Bifidobacteriaceae.Bifidobacterium	4.65461	Model_28Day	4.28231	0.00572132
Bacteria.Proteobacteria.Gammaproteobacteria.Vibrionales	0	Model_28Day	3.6708	0.0047349
Bacteria.Bacteroidetes.Bacteroidia.Bacteroidales.Bacteroidaceae.Bacteroides.Bacteroides_stercoris	1.29938	Model_28Day	2.6177	0.00392562
Bacteria.Bacteroidetes.Bacteroidia.Bacteroidales.Muribaculaceae.Duncaniella	3.57597	Model_28Day	2.76604	0.0221722
Bacteria.Proteobacteria.Gammaproteobacteria.Vibrionales.Vibrionaceae	0	Model_28Day	3.22978	0.0047349
Bacteria.Bacteroidetes.Bacteroidia.Bacteroidales.Tannerellaceae.Parabacteroides.Parabacteroides_distasonis	4.40392	Model_28Day	3.7058	0.0260381
Bacteria.Proteobacteria.Gammaproteobacteria.Vibrionales.Vibrionaceae.Vibrio.Vibrio_parahaemolyticus	0	Model_28Day	3.47606	0.0047349
Bacteria.Bacteroidetes.Bacteroidia.Bacteroidales.Rikenellaceae.Alistipes.Alistipes_sp_Marseille_P2431	2.19303	Model_28Day	2.03526	0.000753086
Bacteria.Firmicutes.Clostridia.Clostridiales.Ruminococcaceae.Bittarella.Bittarella_massiliensis	1.00426	Model_28Day	2.78144	0.0176365
Bacteria.Actinobacteria.Actinobacteria.Bifidobacteriales	4.65461	Model_28Day	4.28231	0.00572132
Bacteria.Actinobacteria.Actinobacteria.Bifidobacteriales.Bifidobacteriaceae.Bifidobacterium.Bifidobacterium_choerinum	1.07342	Model_28Day	2.71991	0.00855356
Bacteria.Actinobacteria.Coriobacteriia.Eggerthellales.Eggerthellaceae.Enterorhabdus.Enterorhabdus_mucosicola	3.3216	Model_28Day	2.52695	0.0307659
Bacteria.Actinobacteria.Actinobacteria	4.65503	Model_28Day	4.28245	0.00572132
Bacteria.Actinobacteria.Coriobacteriia.Coriobacteriales.Atopobiaceae	0.794381	Model_28Day	2.64521	0.0302235
Bacteria.Firmicutes.Clostridia.Clostridiales.Ruminococcaceae.Bittarella	1.00426	Model_28Day	2.78144	0.0176365
Bacteria.Actinobacteria.Coriobacteriia.Coriobacteriales.Atopobiaceae.Olsenella.Olsenella_umbonata	0.794381	Model_28Day	2.60673	0.0302235
Bacteria.Bacteroidetes.Bacteroidia.Bacteroidales.Muribaculaceae.Duncaniella.Duncaniella_muris	3.57597	Model_28Day	2.76604	0.0221722
Bacteria.Actinobacteria	4.74174	Model_28Day	4.30423	0.00703558

## Sheet: Table S4
Table S4 Representative differential gut microbes functional unit in all samples
Taxon	Control vs Model_7Day			Control vs Model_14Day			Control vs Model_28Day
	FC	P-value	FDR	FC	P-value	FDR	FC	P-value	FDR
K00712	2.70567	0.000366914	0.0211756	1.41984	0.227893	0.626781	0.635196	0.138566	0.421624
K00799	5.33862	5.54757e-05	0.00969284	1.60336	0.256106	0.655532	2.18198	0.0223976	0.289326
K01419	2.08533	2.75345e-07	0.000865959	1.62987	0.00387191	0.19861	1.11586	0.293163	0.566657
K01584	12.0267	7.73832e-06	0.0048674	4.84434	0.00519325	0.216268	1.17336	0.654439	0.807796
K03089	2.75752	2.86434e-05	0.00746526	1.72516	0.0306294	0.349112	1.20997	0.0228077	0.289326
K03203	13.3987	4.92437e-05	0.00911009	4.17799	0.0155727	0.294904	1.33311	0.619845	0.783006
K03930	1.48533	0.0184393	0.177162	1.20505	0.209401	0.609096	0.715938	0.0937973	0.369323
K08095	4.77059	7.18395e-06	0.0048674	2.80301	0.0118011	0.280033	1.43113	0.280442	0.562391
K09798	2.05329	0.000466769	0.0257542	1.16101	0.472118	0.752983	0.72794	0.0799227	0.356896
K09969	10.8583	2.81503e-05	0.00746526	4.88198	0.0109586	0.272325	3.34774	0.0121553	0.266262
K10771	0.453688	6.16377e-05	0.00978741	0.634291	0.0147607	0.294499	1.1514	0.334621	0.570886
K10796	2.84837	0.000888499	0.0355965	1.555	0.248184	0.646794	0.645639	0.229764	0.509303
K12049	9.68834	3.15309e-05	0.00746526	3.44293	0.0974256	0.476222	2.57511	0.0220484	0.289326
K12810	637.364	6.01513e-05	0.00978741	144.587	0.00629547	0.236426	2.87779	0.323055	0.566657
K13283	10.1132	3.5679e-05	0.00746526	3.12327	0.00965924	0.26167	2.76194	0.0076934	0.245571
K13588	6.94523	3.13914e-05	0.00746526	1.59487	0.199743	0.598376	2.73176	0.0221341	0.289326
K14326	17.4283	5.15629e-05	0.00926659	9.77974	0.0222481	0.316284	2.85918	0.0481654	0.329757
K16150	0.307951	3.56714e-06	0.00373955	0.355478	1.81545e-05	0.0167712	1.08398	0.765786	0.875384
K17235	1.48058	0.00503969	0.0869898	1.28309	0.131564	0.52179	0.679945	0.0236628	0.289731
K17245	2.49163	6.24684e-06	0.0048674	1.62343	0.0236403	0.322305	1.40214	0.304497	0.566657
K18197	2.36144	2.58334e-06	0.00373955	2.41478	0.000482666	0.0801733	1.3974	0.031742	0.312888
K19426	3.18925	9.53922e-05	0.0109094	1.64121	0.189273	0.586458	0.740507	0.387168	0.616487
