# Supplementary material for: The Time-Dependent Dynamics of Gut Microbiota and the Interaction With Host Metabolism in Mouse Pulmonary Fibrosis Models
Source: Research Square preprint supplement (doi:10.21203/rs.3.rs-882650/v1), 2021-09-30
Supplement: Supplementary file 7 [file c1cecaec82c8f60b24144b6f.xlsx]

## Sheet: Sheet1
Table S4 Representative differential gut microbes functional unit in all samples
Taxon	Control vs Model_7Day			Control vs Model_14Day			Control vs Model_28Day
	FC	P-value	FDR	FC	P-value	FDR	FC	P-value	FDR
K00712	2.70567	0.000366914	0.0211756	1.41984	0.227893	0.626781	0.635196	0.138566	0.421624
K00799	5.33862	5.54757e-05	0.00969284	1.60336	0.256106	0.655532	2.18198	0.0223976	0.289326
K01419	2.08533	2.75345e-07	0.000865959	1.62987	0.00387191	0.19861	1.11586	0.293163	0.566657
K01584	12.0267	7.73832e-06	0.0048674	4.84434	0.00519325	0.216268	1.17336	0.654439	0.807796
K03089	2.75752	2.86434e-05	0.00746526	1.72516	0.0306294	0.349112	1.20997	0.0228077	0.289326
K03203	13.3987	4.92437e-05	0.00911009	4.17799	0.0155727	0.294904	1.33311	0.619845	0.783006
K03930	1.48533	0.0184393	0.177162	1.20505	0.209401	0.609096	0.715938	0.0937973	0.369323
K08095	4.77059	7.18395e-06	0.0048674	2.80301	0.0118011	0.280033	1.43113	0.280442	0.562391
K09798	2.05329	0.000466769	0.0257542	1.16101	0.472118	0.752983	0.72794	0.0799227	0.356896
K09969	10.8583	2.81503e-05	0.00746526	4.88198	0.0109586	0.272325	3.34774	0.0121553	0.266262
K10771	0.453688	6.16377e-05	0.00978741	0.634291	0.0147607	0.294499	1.1514	0.334621	0.570886
K10796	2.84837	0.000888499	0.0355965	1.555	0.248184	0.646794	0.645639	0.229764	0.509303
K12049	9.68834	3.15309e-05	0.00746526	3.44293	0.0974256	0.476222	2.57511	0.0220484	0.289326
K12810	637.364	6.01513e-05	0.00978741	144.587	0.00629547	0.236426	2.87779	0.323055	0.566657
K13283	10.1132	3.5679e-05	0.00746526	3.12327	0.00965924	0.26167	2.76194	0.0076934	0.245571
K13588	6.94523	3.13914e-05	0.00746526	1.59487	0.199743	0.598376	2.73176	0.0221341	0.289326
K14326	17.4283	5.15629e-05	0.00926659	9.77974	0.0222481	0.316284	2.85918	0.0481654	0.329757
K16150	0.307951	3.56714e-06	0.00373955	0.355478	1.81545e-05	0.0167712	1.08398	0.765786	0.875384
K17235	1.48058	0.00503969	0.0869898	1.28309	0.131564	0.52179	0.679945	0.0236628	0.289731
K17245	2.49163	6.24684e-06	0.0048674	1.62343	0.0236403	0.322305	1.40214	0.304497	0.566657
K18197	2.36144	2.58334e-06	0.00373955	2.41478	0.000482666	0.0801733	1.3974	0.031742	0.312888
K19426	3.18925	9.53922e-05	0.0109094	1.64121	0.189273	0.586458	0.740507	0.387168	0.616487
